# Supplementary material for: Stress management in obesity during a thermal spa residential programme (ObesiStress): protocol for a randomised controlled trial study
Source: PubMed Central journal article supplement — BMJ Open. 2019 Dec 23;9(12):e027058. doi: 10.1136/bmjopen-2018-027058 (PMC7008425; doi:10.1136/bmjopen-2018-027058), 2019-12-23
Supplement: bmjopen-2018-027058.draft_revisions.pdf [file bmjopen-2018-027058.draft_revisions.pdf]

# BMJ Open

BMJ Open is committed to open peer review. As part of this commitment we make the peer review history of every article we publish publicly available.

When an article is published we post the peer reviewers' comments and the authors' responses online. We also post the versions of the paper that were used during peer review. These are the versions that the peer review comments apply to.

The versions of the paper that follow are the versions that were submitted during the peer review process. They are not the versions of record or the final published versions. They should not be cited or distributed as the published version of this manuscript.

BMJ Open is an open access journal and the full, final, typeset and author-corrected version of record of the manuscript is available on our site with no access controls, subscription charges or pay-per-view fees (<http://bmjopen.bmj.com>).

If you have any questions on BMJ Open's open peer review process please email [info.bmjopen@bmj.com](mailto:info.bmjopen@bmj.com)

# BMJ Open

## ObesiStress: Stress Management in Obesity during a thermal spa residential program – The protocol of a randomized controlled trial study.

|                               |                                                                                                                                                                                                                                                                                                                                                                                                                                                                                                                                                                                                                                                                                                                                                                                                                                                                                                                                                                                                                                                                                                                                                                                                                                                                                                                                                                                                                                                                                                                                                                                                                                                                                                                                                                                                                                                                                                                                                                                                                                                                                                                                                                                                                                |
|-------------------------------|--------------------------------------------------------------------------------------------------------------------------------------------------------------------------------------------------------------------------------------------------------------------------------------------------------------------------------------------------------------------------------------------------------------------------------------------------------------------------------------------------------------------------------------------------------------------------------------------------------------------------------------------------------------------------------------------------------------------------------------------------------------------------------------------------------------------------------------------------------------------------------------------------------------------------------------------------------------------------------------------------------------------------------------------------------------------------------------------------------------------------------------------------------------------------------------------------------------------------------------------------------------------------------------------------------------------------------------------------------------------------------------------------------------------------------------------------------------------------------------------------------------------------------------------------------------------------------------------------------------------------------------------------------------------------------------------------------------------------------------------------------------------------------------------------------------------------------------------------------------------------------------------------------------------------------------------------------------------------------------------------------------------------------------------------------------------------------------------------------------------------------------------------------------------------------------------------------------------------------|
| Journal:                      | <i>BMJ Open</i>                                                                                                                                                                                                                                                                                                                                                                                                                                                                                                                                                                                                                                                                                                                                                                                                                                                                                                                                                                                                                                                                                                                                                                                                                                                                                                                                                                                                                                                                                                                                                                                                                                                                                                                                                                                                                                                                                                                                                                                                                                                                                                                                                                                                                |
| Manuscript ID                 | bmjopen-2018-027058                                                                                                                                                                                                                                                                                                                                                                                                                                                                                                                                                                                                                                                                                                                                                                                                                                                                                                                                                                                                                                                                                                                                                                                                                                                                                                                                                                                                                                                                                                                                                                                                                                                                                                                                                                                                                                                                                                                                                                                                                                                                                                                                                                                                            |
| Article Type:                 | Protocol                                                                                                                                                                                                                                                                                                                                                                                                                                                                                                                                                                                                                                                                                                                                                                                                                                                                                                                                                                                                                                                                                                                                                                                                                                                                                                                                                                                                                                                                                                                                                                                                                                                                                                                                                                                                                                                                                                                                                                                                                                                                                                                                                                                                                       |
| Date Submitted by the Author: | 22-Oct-2018                                                                                                                                                                                                                                                                                                                                                                                                                                                                                                                                                                                                                                                                                                                                                                                                                                                                                                                                                                                                                                                                                                                                                                                                                                                                                                                                                                                                                                                                                                                                                                                                                                                                                                                                                                                                                                                                                                                                                                                                                                                                                                                                                                                                                    |
| Complete List of Authors:     | <p>DUTHEIL, Frédéric; Occupational Medicine, University Hospital CHU G. Montpied; Australian Catholic University, Faculty of Health, School of Exercise Science</p> <p>CHAPLAIS, Elodie; Australian Catholic University, School of Exercise Science; University of Lorraine; DevAH Laboratory (EA 3450), Exercise Sciences</p> <p>VILMANT, Audrey; Occupational Medicine, University Hospital CHU G. Montpied</p> <p>COURTEIX, Daniel; Laboratoire AME2P - Université Clermont Auvergne; Australian Catholic University, School of Exercise Science</p> <p>DUCHE, Pascale; AME2P Laboratory - Université Clermont Auvergne</p> <p>ABERGEL, Armand; Université Clermont Auvergne, CNRS, UMR 6284, University Hospital of Clermont-Ferrand, CHU Clermont-Ferrand, Hepatology Gastroenterology</p> <p>PFABIGAN, Daniela M. ; School of Psychological and Cognitive Sciences, PKU-IDG/McGovern Institute for Brain Research, Beijing Key Laboratory of Behavior and Mental Health, Peking University</p> <p>HAN, Shihui; School of Psychological and Cognitive Sciences, PKU-IDG/McGovern Institute for Brain Research, Beijing Key Laboratory of Behavior and Mental Health, Peking University</p> <p>MONDILLON, Laurie; University Clermont Auvergne, and LAPSCO-CNRS, Psychology</p> <p>VALLET, Guillaume T.; Université Clermont Auvergne, CNRS, LaPSCo, Physiological and Psychosocial Stress</p> <p>Mermillod, Martial; Centre Hospitalier Universitaire Grenoble Alpes</p> <p>BOUDET, Gil; Occupational Medicine, University Hospital CHU G. Montpied</p> <p>Obert, Philippe; University of Avignon, Laboratory of Pharm-Ecology Cardiovascular EA4278</p> <p>Izem, Omar; Laboratory of Cardiovascular Pharm-ecology (LaPEC EA4278), Avignon University</p> <p>MIOLANNE-DEBOUIT, Magalie; University Hospital of Clermont-Ferrand, CHU Clermont-Ferrand, Unit of Human Nutrition</p> <p>Farigon, Nicolas; University Hospital of Clermont-Ferrand, CHU Clermont-Ferrand, Unit of Human Nutrition</p> <p>Pereira, Bruno; University Hospital CHU Clermont-Ferrand,</p> <p>Boirie, Yves; Université Clermont Auvergne, INRA, CRNH, University Hospital of Clermont-Ferrand, CHU Clermont-Ferrand, Unit of Human Nutrition</p> |

1  
2  
3  
4  
5  
6  
7  
8  
9  
10  
11  
12  
13  
14  
15  
16  
17  
18  
19  
20  
21  
22  
23  
24  
25  
26  
27  
28  
29  
30  
31  
32  
33  
34  
35  
36  
37  
38  
39  
40  
41  
42  
43  
44  
45  
46  
47  
48  
49  
50  
51  
52  
53  
54  
55  
56  
57  
58  
59  
60

|           |                                                               |
|-----------|---------------------------------------------------------------|
| Keywords: | obesity, stress, prevention, heart rate variability, spa bath |
|           |                                                               |

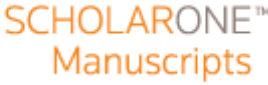

# ObesiStress: Stress Management in Obesity during a thermal spa residential program – The protocol of a randomized controlled trial study.

Frédéric DUTHEIL<sup>1,2</sup>, Elodie CHAPLAIS<sup>2,4,5,15</sup>, Audrey Vilmant<sup>1</sup>, Daniel COURTEIX<sup>2,3</sup>, Pascale DUCHE<sup>3</sup>,  
Armand ABERGEL<sup>6</sup>, Daniela M. PFABIGAN<sup>7</sup>, Shihui HAN<sup>7</sup>, Laurie MONDILLON<sup>8</sup>, Guillaume T. VALLET<sup>8</sup>,  
Martial MERMILLOD<sup>9,10</sup>, Gil BOUDET<sup>1</sup>, Philippe OBERT<sup>2,11</sup>, Omar IZEM<sup>11</sup>, Magalie MIOLANNE-DEBOUIT<sup>12</sup>,  
Nicolas FARIGON<sup>12</sup>, Bruno PEREIRA<sup>13</sup>, Yves BOIRIE<sup>14</sup>

## Authors' affiliations:

<sup>1</sup> Université Clermont Auvergne, CNRS, LaPSCo, Physiological and Psychosocial Stress, University Hospital of Clermont-Ferrand, CHU Clermont-Ferrand, Preventive and Occupational Medicine, WittyFit, Clermont-Ferrand, France

<sup>2</sup> Australian Catholic University, Faculty of Health, School of Exercise Science, Melbourne, Victoria 3065 Australia

<sup>3</sup> Université Clermont Auvergne, Laboratory of the Metabolic Adaptations to Exercise under Physiological and Pathological Conditions (AME2P - EA 3533), Clermont-Ferrand, France

<sup>4</sup> Australian Catholic University, Faculty of Health Science, School of Exercise Science, Strathfield, NSW 2135 Australia

<sup>5</sup> University Hospital of Clermont-Ferrand, CHU Clermont-Ferrand, Biostatistics Unit, Clinical research and Innovation Department (DRCI), Clermont-Ferrand, France

<sup>6</sup> Université Clermont Auvergne, CNRS, UMR 6284, University Hospital of Clermont-Ferrand, CHU Clermont-Ferrand, Hepatology Gastroenterology, Clermont-Ferrand, France

<sup>7</sup> School of Psychological and Cognitive Sciences, PKU-IDG/McGovern Institute for Brain Research, Beijing Key Laboratory of Behavior and Mental Health, Peking University, Beijing, China

<sup>8</sup> Université Clermont Auvergne, CNRS, LaPSCo, Physiological and Psychosocial Stress, Clermont-Ferrand, France

<sup>9</sup> Grenoble Alpes University, LNPC, CNRS, Grenoble, France

<sup>10</sup> Institut Universitaire de France, Paris, France

<sup>11</sup> Laboratory of Cardiovascular Pharm-ecology (LaPEC EA4278), Avignon University, Avignon, France

1  
2  
3 <sup>12</sup> University Hospital of Clermont–Ferrand, CHU Clermont–Ferrand, Unit of Human Nutrition, Clermont-  
4 Ferrand, France.

5  
6 <sup>13</sup> University Hospital of Clermont-Ferrand, CHU Clermont-Ferrand, Biostatistics Unit, Clinical research and  
7 Innovation Department (DRCI), Clermont-Ferrand, France

8  
9  
10 <sup>14</sup> Université Clermont Auvergne, INRA, CRNH, University Hospital of Clermont–Ferrand, CHU Clermont–  
11 Ferrand, Unit of Human Nutrition, Clermont-Ferrand, France.

12  
13 <sup>15</sup> Université de Lorraine, Laboratory ``Development, Adaption and Disability" (DevAH - EA 3450), Nancy,  
14 France

15  
16  
17  
18 - **Corresponding author** – CHAPLAIS Elodie (PhD), Université de Lorraine, Laboratory ``Development,  
19 Adaption and Disability" (EA 3450), Faculty of Sports Sciences and Faculty of Medicine, 9 avenue de la  
20 Forêt de Haye, CS 50184, F-54505 Vandœuvre-lès-Nancy, France; elodie.chaplais@acu.edu.au  
21  
22  
23

24  
25  
26  
27 **Keywords:** obesity, stress, prevention, heart rate variability, spa bath

28  
29 **Word count:** 4023 words (without abstract + strength and limitation)

30  
31 **Number of figure:** 1

32  
33  
34 **Protocol version:** version 1, 10/2018  
35  
36  
37  
38  
39  
40  
41  
42  
43  
44  
45  
46  
47  
48  
49  
50  
51  
52  
53  
54  
55  
56  
57  
58  
59  
60

1  
2  
3 **Abstract - Introduction:** Stress and obesity are two public health issues. The relationships between obesity  
4 and stress are biological via the action of stress on the major hormones regulating appetite (leptin,  
5 ghrelin). Many spa resorts are specialized in the treatment of obesity in France but actually no thermal spa  
6 proposes a specific program to manage stress in obesity. The ObesiStress protocol was designed to offer  
7 thermal spa residential program of stress management in the treatment of obesity, which implement  
8 stress management strategies as suggested by International recommendations.  
9  
10  
11  
12  
13  
14  
15

16 **Methods and analysis:** 140 overweight or obese participants with Body Mass Index (BMI) >25 kg.m<sup>-2</sup> and  
17 aged over 18 years will be recruited. Participants will be randomized into two groups: a control group of  
18 usual practice (restrictive diet, physical activity and thermal spa treatment) and an intervention group with  
19 a stress management in addition to the usual practice. In the present protocol, parameters will be  
20 measured on five occasions (at inclusion, at the beginning of the spa (day 0), at the end of the spa (day  
21 21), at 6 and 12 months). The study will assess participants' heart rate variability, cardiac remodeling and  
22 function, electrodermal activity, blood markers, anthropometry profile, body composition, psychology and  
23 quality of life via questionnaires and bone parameters.  
24  
25  
26  
27  
28  
29  
30  
31  
32  
33

34 **Ethics and dissemination:** The ObesiStress protocol complies with the Ethics guidelines for Clinical  
35 Research and has been approved by the Ethic Committee (CPP Sud-Est VI, Clermont-Ferrand - ANSM: 2016-  
36 A01774-47). This study would highlight the effect of a 21 days thermal spa residential program of stress  
37 management in obesity will exhibit its efficacy through objective measures of well-being and  
38 cardiovascular morbidity. Results will be disseminated at several research conferences and published  
39 articles in peer-reviewed journals.  
40  
41  
42  
43  
44  
45  
46

47 **Trial Registration:** NCT 03578757  
48  
49  
50  
51

52 **Strengths and limitations of this study:**  
53  
54  
55  
56  
57  
58  
59  
60

- 1  
2  
3 • Reliability and validity of a 21 days specific thermal spa residential program on stress management  
4  
5 in the treatment of obesity  
6  
7  
8 • Better comprehension of psychological and psychological mechanisms involved in stress  
9  
10 management in obesity.  
11  
12 • 12-months mixt gender longitudinal study  
13  
14  
15 • Unable to accurately account for the long-term cost-effective benefits of the study  
16  
17  
18  
19  
20  
21  
22  
23  
24  
25  
26  
27  
28  
29  
30  
31  
32  
33  
34  
35  
36  
37  
38  
39  
40  
41  
42  
43  
44  
45  
46  
47  
48  
49  
50  
51  
52  
53  
54  
55  
56  
57  
58  
59  
60
- Reliability and validity of a 21 days specific thermal spa residential program on stress management in the treatment of obesity
  - Better comprehension of psychological and psychological mechanisms involved in stress management in obesity.
  - 12-months mixt gender longitudinal study
  - Unable to accurately account for the long-term cost-effective benefits of the study

## Introduction

Stress and obesity are two public health issues.[1-3] Stress can lead to obesity via inappropriate eating behaviors.[4] In addition, obesity is a major stress factor.[5] Furthermore, stressed people are also those who have the greatest difficulties to lose weight.[6] The relationships between obesity and stress are biological via the action of stress on the major hormones regulating appetite (leptin, ghrelin).[7, 8] The relationships between obesity and stress are so strong that proposals of international recommendation suggest to implement stress management programs in obesity for a sustainable weight loss.[9]

Among the multiple physical and psychological consequences of stress and obesity, increased mortality and cardiovascular morbidity seem the main concern.[10] Stress and obesity alter the functioning of the autonomic nervous system. [11-13] A deregulation of sympatho-vagal balance is a major factor of morbidity cardiovascular mortality.[14] Stress and obesity also cause arterial ischemic pathology, [15] via complex mechanisms involving changes of endothelial and arterial atherosclerosis.[15] These microvascular changes are linked to systemic inflammation caused by stress[16] and obesity.[17]

The thermal spa resort of Vichy, as well as other some spa centers in France, have already an expertise in obesity treatment by physical activity, diet, and hydrotherapy. However, there are no spa resort centers which has ever proposed to include a stress management program in obesity treatment. Non-pharmacological stress management can be done through psychological interventions (i.e. physical [18] and psychoanalytic approaches [19], cognitive behavioral therapy,[20] acceptance and commitment therapy,[21, 22] or mindfulness.[23, 24]), physical activity,[25, 26] and improvement of eating disorders induced by stress.[27] The benefits of physical activity on the physical and mental health are indisputable, at any age, and with any activity.[28]



1  
2  
3 The main hypothesis of this project is that a thermal spa residential program (21 days) of stress in obesity  
4 will exhibit its efficacy through objective measures of well-being and cardiovascular morbidity, such as  
5 heart rate variability which is both a biomarker of stress and linked with life expectancy.  
6  
7  
8  
9  
10  
11  
12

### 13 **Methods**

14  
15  
16 **Protocol design:** This one-year randomized controlled study with repeated measures on five occasions  
17 (inclusion, at the start, at the end of the spa, at 6 and 12 months), will allow us to understand the effect of  
18 a 21 days spa residential program of stress management in the treatment of obesity especially through  
19 measures of well-being and cardiovascular morbidity.  
20  
21  
22  
23  
24

25 For this study, two groups of overweight or obese participants will be compared: one receiving a 21 days  
26 usual thermal spa residential program, one receiving a 21 days usual thermal spa residential program plus  
27 a psychological intervention (Figure1). Randomization will be stratified by BMI category (25-30, 30-35,  
28 >35), sex, and level of stress (visual analog scale of stress <50, between 50 and 80, >80), using minimization  
29 approach.  
30  
31  
32  
33  
34  
35  
36  
37  
38  
39

### 40 **Selection criteria:**

41  
42 **Inclusion criteria common to studies:** Volunteers will be overweight or obese participants aged over 18  
43 years, who wish to follow a spa thermal residential program for the treatment of obesity. Participants must  
44 have a stable weight during the last three months, with no hepatic, renal or endocrine diseases  
45 uncontrolled. Stress at baseline will not be an inclusion criteria but an explanatory/independent variable.  
46  
47  
48  
49 In compliance with Human Ethics guidelines, participants will have to be covered by a social health  
50 insurance and will have to sign consent forms.  
51  
52  
53  
54  
55  
56  
57  
58  
59  
60

1  
2  
3 **Exclusion criteria:** Volunteers participating in the study will be excluded if major treatment and/or  
4  
5 protocol deviations are observed.  
6  
7

8  
9  
10  
11 **Power analysis:** The rationale for the sample size calculation is based on (HRV) the log LF / HF with low  
12  
13 values associated with a good adaptation of the autonomic nervous system. We considered a comparison  
14  
15 of two randomized groups with the same sample size, with a statistical power at 90%, and a two-sided  
16  
17 type I error of 5%. According to our results from a pilot study, [3] we assumed that log LF / HF would  
18  
19 decrease the by  $25\pm 22\%$  in the group with a stress management program vs  $13\pm 20\%$  in the group without  
20  
21 a stress management program. Assuming a difference of  $12\pm 20\%$  between the two groups at one year, we  
22  
23 need to include  $n = 59$  participants by group. Finally, to take into account lost to follow-up, it is proposed  
24  
25 to recruit 70 patients per arm.  
26  
27  
28  
29  
30  
31  
32

33 **Participants:** As previously stated participants engaged in this protocol will be mixed gender overweight  
34  
35 or obese volunteers aged over 18 years. Following approval from Ethic committees, and based on our  
36  
37 calculation, a total of 70 volunteers per group (i.e. 140 in total) will be enrolled to account for potential  
38  
39 dropouts. All participants will be given written information regarding the project and will have to signed  
40  
41 consent forms before enrollment. Patients will be recruited through the usual participants of the spa resort  
42  
43 of Vichy, through health-care workers (physicians, dieticians, physiotherapist, etc.), or through  
44  
45 advertisements. Inclusions will be realized at the CHU Clermont-Ferrand or at the thermal spa resort of  
46  
47  
48  
49 Vichy.  
50  
51  
52  
53  
54  
55  
56  
57  
58  
59  
60

1  
2  
3 **Usual thermal spa care:** All participants will benefit from a usual practice thermal spa treatment combining  
4 corrections of eating disorders (and a negative energy balance of 500 kcal/day), physical activity (2h30 per  
5 day, minimum), thermal spa treatment (2h per day, minimum), and health education (1h30 per day,  
6 minimum: cooking, nutrition and physical activity classes...). Physical activity will be diverse (endurance,  
7 strength, circuit training) and personalized to the target of each participant.  
8  
9  
10  
11  
12  
13  
14  
15  
16  
17

18 **Psychological interventions:** Participants randomized to the intervention group will benefit from  
19 psychological interventions based on validated approaches of stress (3 x 1h30 per week). Participants will  
20 attend psychological sessions by group of less than 10 individuals. Individual meeting with the psychologist  
21 will occur at least twice: at the beginning of the residential program and at the end. Psychological  
22 interventions will include various validated approaches of work-related stress: physical [18] and  
23 psychoanalytic [19] approaches, cognitive behavioral therapy,[20] acceptance and commitment  
24 therapy,[22, 29] mindfulness,[23, 24] etc. Participants will have to acquire techniques in order to be  
25 autonomous and pursue at-home psychological training.  
26  
27  
28  
29  
30  
31  
32  
33  
34  
35  
36  
37  
38  
39

40 **Follow-up:** After the intervention phase of the study, participants will undergo a one-year at-home follow-  
41 up.  
42  
43  
44  
45  
46  
47

48 **Measurements:** Each participant will perform a battery of tests (described below). Data collection will be  
49 performed 5 times as previously described, except for DXA and pQCT which will be performed at inclusion  
50 and after 12 months, cardiac remodeling and function which will be performed at inclusion and after 6  
51 months.  
52  
53  
54  
55  
56  
57

1  
2  
3 **Primary outcome:** To assess the ability of a 21 days spa residential program of stress management  
4  
5 in the treatment of obesity on increasing heart rate variability, a biomarker of both stress and  
6  
7 morbidity/mortality.  
8  
9

10 Heart rate variability: HRV parameters will be assessed during 26 hours with a heart rate  
11  
12 transmitter belt simply positioned on the chest, with a 26h recording time, a beat per minute within a 25-  
13  
14 240 range, and respiratory rate within a 3-70 range (Zephyr™ BioHarness™ BT, Zephyr Technology,  
15  
16 Annapolis, USA). The HRV data will be examined according to the recommendations of the European  
17  
18 Society of Cardiology and the North American Society (Task Force). HRV will be explored in time and  
19  
20 frequency domains. [30] The methodology developed by our team will also be applied.[31]  
21  
22  
23  
24  
25  
26  
27

28 **Secondary outcomes:** Secondary outcomes will be (1) to demonstrate an improvement in stress-  
29  
30 and obesity-related variables following the short spa residential program, (2) to study the influence of  
31  
32 genetic polymorphisms on stress, obesity, and on the response to our stress management program, (3) to  
33  
34 examine the relationship between stress- and obesity-related variables, (4) to propose a salient biomarker  
35  
36 or a salient composite index of biomarkers of stress in obesity and (5) to study the effect of observance to  
37  
38 the program during the follow-up on stress- and obesity-related variables.  
39  
40  
41

42 Anthropometry: Anthropometric measures will be taken according to the recommendations of the  
43  
44 International Society for the Advancement of Kinanthropometry for the following measures: standing  
45  
46 height (*m*) and body mass (*kg*), waist circumference (*cm*), and lower limb bone lengths/breadths (*cm*)[32].  
47  
48

49 Body Composition: Body composition (muscle mass and fat mass) will be measured by DXA (DXA,  
50  
51 QDR-4500A, Hologic, Inc., Waltham, MA).  
52

53 Biomarkers of stress and cardiovascular risk: Skin conductance will be measured using wrist band  
54  
55 electrodes with sampling rates at 2, 4, 8, 16 and 32 Hz during the phases 1 to 3. The SC sensor (Q-Sensor®-  
56  
57  
58  
59  
60

1  
2  
3 Affectiva®, Massachusetts Institute of Technology, USA) is set on a wristband and has a 24-hour battery  
4  
5 life when logging. In addition, it will measure wrist movements with a built-in 3-Axis accelerometer.  
6  
7

8  
9 Blood flow velocity and myocardial longitudinal strain will be measured by Speckle  
10 echocardiography (Vivid Q, GE Healthcare, USA). All 2D-dimensional, time-motion, Doppler and 2D-strain  
11 acquisitions and measurements will be performed according to recent guidelines. [33, 34] Left ventricular  
12 (LV) volumes and ejection fraction (EF) will be measured using the Simpson's biplane method. LV mass  
13 (LVM) will be calculated by the Devereux formula and indexed for height (Cornell adjustment). Pulsed-  
14 Doppler LV transmitral velocities, including early (E) and atrial (A) waves, will be obtained in the apical 4-  
15 chamber view. Tissue Doppler Imaging (TDI) measures of myocardial systolic (S'), early diastolic (E') and  
16 atrial (A') velocities will be assessed at the mitral annulus level in the apical 4- and 2-chamber views. The  
17 E/Em ratio was used as an index of LV filling pressure 85. Left atrium (LA) volume was assessed on apical  
18 4- and 2 chamber views. A gradation of LV diastolic dysfunction will be obtained according to recent  
19 guidelines 85. 2D cine-loops (frame rate >70ips) of at least 5 cycles will be recorded in the short-axis views  
20 (base, mid, apex), as well as in the apical 4-, 3- and 2-chamber views. 2D-strain analysis will be performed  
21 post-processing using EchoPAC 201TM software (GE Healthcare, USA). Longitudinal and circumferential  
22 strains and strain rates (SR), as well as rotations at the apex and base, will be directly obtained from the 6  
23 segment model. Twist mechanics will be computed from apical and basal rotational data using dedicated  
24 software (Scilab, Paris, France). For each view, the 3 cardiac cycles displaying the best image quality will  
25 be selected. Blood pressure and heart rate will be continuously monitored, and the systolic meridional  
26 wall stress, an index of afterload, will be calculated. LV end-diastolic volumes will also be obtained as  
27 preload index.  
28  
29  
30  
31  
32  
33  
34  
35  
36  
37  
38  
39  
40  
41  
42  
43  
44  
45  
46  
47  
48  
49  
50  
51  
52  
53  
54  
55  
56  
57  
58  
59  
60

1  
2  
3 Endocrine assays: Blood samples will be collected by a qualified pediatric nurse after participants  
4  
5 have fasted overnight. Blood will be collected using a venipuncture at the brachial vein. After collection,  
6  
7 blood will be centrifuged and aliquots will be stored ( $-80^{\circ}$ ) for subsequent analysis.  
8

9  
10 Basic biology (*TG, cholesterol, LDLC, HDLC, HbA1c, cortisol, DHEAS*) as well as all other biochemical  
11  
12 determination (*leptin, ghrelin, BDNF, IL-1 $\beta$ , IL-6, IL-1, TNF $\alpha$ , NPY*) will be assessed in the biochemistry  
13  
14 laboratory of Clermont-Ferrand University Hospital. All analyses will be conducted by the same technician.  
15  
16 Polymorphism of the angiotensin converting enzyme and polymorphism of the serotonin will be measured  
17  
18 by blood cells.  
19

20  
21 Complementary measures: Stress fatigue and sleep (Visual analogue scale of 100 mm), burn out  
22  
23 (Maslach Burn Out Inventory), depression and anxiety (Hospital Anxiety and Depression Scale, STAI-Y and  
24  
25 Hamilton scale for anxiety 7 items), mindfulness (Freiburg Mindfulness Inventory), coping strategies (Brief  
26  
27 COPE Questionnaire), emotions (Emotion Regulation Questionnaire), perception of work (Job Content  
28  
29 Questionnaire of Karasek), self-efficacy (Perceived self-efficacy scale), alexithymia (Toronto Alexithymia  
30  
31 Scale), illness perception (Brief Illness Perception Questionnaire (B-IPQ)), metacognition (MetaCognition  
32  
33 Questionnaire), general health (General health questionnaire 12 items), lifestyle (smoking, alcohol...), and  
34  
35 physical activity (Recent Physical Activity Questionnaire (RPAQ)) will be obtained by questionnaires.  
36  
37  
38

39  
40 Bone parameters: Bone microarchitecture will be measured by Peripheral Quantitative Computed  
41  
42 Tomography (pQCT, XCT 3000 Stratec Medizintechnik Pforzheim, Germany).[35-37] Bone mineral content  
43  
44 ( $g/cm$ ), volumetric cortical and trabecular BMC ( $mg/cm^3$ ), total area ( $mm^2$ ), cortical and trabecular area  
45  
46 ( $mm^2$ ) and density ( $g/cm^2$ ), bone strength ( $mm^3$ ), will be assessed by tomographic slices of 2 mm thickness  
47  
48 at the distal (4%), proximal (66%) site of the non-dominant tibia and radius. Scan speed and voxel size are  
49  
50 20 mm/s and 0.4 mm, respectively. To assure quality of measurement, calibration checks will be  
51  
52 performed by scanning a standard phantom with known densities, prior to each scan.  
53  
54  
55  
56  
57  
58  
59

1  
2  
3 Bone densitometry will be measured by Dual energy X ray Absorptiometry (DXA, QDR-4500A,  
4 Hologic, Inc., Waltham, MA). Bone mineral density (BMD, g/cm<sup>2</sup>), bone mineral content (BMC, g), bone  
5 area (cm<sup>2</sup>) will be determined for each participant. The DXA measurements will be taken for whole body,  
6 lumbar spine (L2-L4) and non-dominant hip (including the femoral neck, trochanteric and intertrochanteric  
7 regions). All DXA scans will be conducted by the same technician and quality assurance checks will be  
8 performed routinely. The in-vivo coefficient of variation (CV) is 0.5%.  
9  
10  
11  
12  
13  
14  
15

16  
17  
18 **Statistical analysis:** Statistical analysis will be performed using Stata software (version 13; Stata-Corp,  
19 College Station, Tex., USA). All statistical tests will be two-sided and p<0.05 will be considered significant.  
20 After testing for normal distribution (Shapiro-Wilk test), data will be treated either by parametric or non-  
21 parametric analyses according to statistical assumptions. Inter-groups comparisons will be performed 1)  
22 without adjustment and 2) adjusting on possible confounder's factors.  
23  
24  
25  
26  
27  
28  
29

30 To highlight that the spa residential program will have long-term benefits (one year) on biomarkers  
31 of stress, the comparisons will be performed using Student t-test or Mann-Whitney test if assumptions of  
32 t-test are not respected (normality and homoscedasticity analyzed using Fisher-Snedecor's test). The  
33 results will be expressed as effect-size and 95% confidence interval. This primary analysis will be completed  
34 by multivariable analysis (linear regression with logarithmic transformation of dependent outcome if  
35 necessary) considering an adjustment on covariates fixed according to univariate results, epidemiological  
36 relevance and observance to physical activity. The results will be expressed as regression coefficients and  
37 95% confidence intervals.  
38  
39  
40  
41  
42  
43  
44  
45  
46  
47  
48

49 Comparisons between groups will be performed similarly as presented previously for quantitative  
50 outcomes. Comparisons concerning categorical variables will be performed using Chi-squared or when  
51 appropriate Fischer-exact test. The results will be expressed as absolute risk differences and 95%  
52 confidence intervals. Then, the multivariable analysis will be conducted using linear and generalized linear  
53  
54  
55  
56  
57  
58  
59  
60

1  
2  
3 models according to the statistical nature of dependent endpoint. The results will be expressed as  
4 regression coefficients or relative risks, and 95% confidence intervals.  
5

6  
7 Moreover, the relations between quantitative parameters will be analyzed using correlation  
8 coefficients (Pearson or Spearman according to statistical distribution). Considering the several multiple  
9 comparisons, a correction of the type I error will be applied (Sidak's correction). The comparisons of  
10 correlation coefficients (in different groups of subjects and within a single group of subjects) will be  
11 performed using Fisher's Z transformation [38] and Williams' T2 statistic [39]. Multidimensional factorial  
12 analyses will be performed to complete these statistical analyses.  
13  
14  
15  
16

17  
18 Concerning the parameters collected longitudinally, mixed models will be performed to study fixed  
19 effects – group, time points evaluation and their interaction – taking into account between and within  
20 subject variability (as random-effect). For continuous endpoints, the normality of residuals will be assessed  
21 using the Shapiro-Wilk test.  
22  
23  
24  
25  
26  
27

## 28 **Radiation**

29  
30 Both DXA and pQCT provide measures of body composition and bone properties by exposing participants  
31 to low level radiation: 0.0056 mSv from DXA scans (*whole body, lumbar and hip*) and 0.0014 mSv from the  
32 pQCT scans (*tibia and radius measures*) [40]. Over the duration of each study, the effective dose of 0.014  
33 mSv will be administered.  
34  
35  
36  
37  
38  
39  
40

## 41 **Patient and public involvement**

42  
43 The Thermal spa center of Vichy in collaboration with the Preventive and Occupational Medicine  
44 Department of the University Hospital of Clermont-Ferrand identified and addressed the following  
45 priorities: prevention, obesity, weight loss, stress, cardiovascular morbidity. We are grateful for the  
46 opinion of volunteers and professionals from the Vichy Spa Center on the psychological intervention.  
47  
48 Conferences and meetings with participants will be organised in order to provide them feedback from this  
49 research.  
50  
51  
52  
53  
54  
55  
56  
57  
58  
59  
60



### **Ethical considerations and dissemination**

The ObesiStress protocol complies with the Ethics guidelines for Clinical Research and has been approved by the Ethic Committee (CPP Sud-Est VI, Clermont-Ferrand - ANSM: 2016-A01774-47), the protocol has also been registered in Clinical Trial NCT 03578757. In accordance with Ethical considerations, the chief investigator is responsible of ensuring that participants understand potential risks and benefits of taking part in the study. Moreover, the chief investigator is responsible for obtaining writing consent from participants. The results will be disseminated at several research conferences and published articles in peer-reviewed journals.

### **Discussion**

The ObesiStress protocol was designed to provide a better understanding of the effect of a spa residential program combined with a stress management program on the improvement of heart rate variability in the treatment of obesity. The creation of a new thermal program would allow new innovative approaches for stress management in obesity. The long-term success of lifestyle interventions such as those proposed in prevention of obesity is the observance to the treatment (nutrition, physical activity, psychology).[41] We previously demonstrated that a spa program may play a major role in sustainable lifestyle changes.[42] Because of the stress management program and because the participants will be accompanied by health-care professionals, the observance to treatment during a one-year follow-up could be more efficient.

### **Current study status**

The status of the trial is ongoing recruitment.

## **Funding**

The study is integrally funded by the Auvergne Rhône-Alpes, the University Hospital of Clermont-Ferrand and by the European Regional Development Fund (FEDER, Fonds Europeen de Développement Economique et Régional). The funding source had no role in the design, conduct, or reporting of the study.

## **Competing interests**

The authors declare that they have no competing interests.

## **Author's contributions**

FD contributed to the study design. FD was responsible for ethics committee. FD and AV will coordinate the recruitment of patients. DC, EC and PD will be responsible for bone measures. AA will be responsible for liver-related factors. DP and SH will be responsible for psychosocial analysis. LM and MM will be responsible for mindfulness, psychological education and cognitive-compartmental therapy analysis. GV will be responsible for the analysis of memory-related data. PO, OI and GB will be responsible for cardiovascular measures. YB, NF and MMD will be responsible for nutritional measures and analysis. DC, EC and PD will be responsible for physical activity analysis. AV will be responsible for the collection of psychological factors. BP is responsible for the statistical analysis. EC was responsible for the clinical trial and wrote the first draft of this manuscript. All authors read, contributed towards and approved of the final manuscript.

## Acknowledgement

Nothing to declare

## References

1. Quine, L., *Workplace bullying in NHS community trust: staff questionnaire survey*. BMJ, 1999. **318**(7178): p. 228-32.
2. *Plus de 3 millions de Français au bord du burn-out*. Le Monde, 2014(24 janvier).
3. Dutheil, F., et al., *Different modalities of exercise to reduce visceral fat mass and cardiovascular risk in metabolic syndrome: the RESOLVE\* randomized trial*. International Journal of Cardiology, 2013.
4. Sinha, R. and A.M. Jastreboff, *Stress as a Common Risk Factor for Obesity and Addiction*. Biological Psychiatry, 2013.
5. Foss, B. and S.M. Dyrstad, *Stress in obesity: cause or consequence?* Medical Hypotheses, 2011. **77**(1): p. 7-10.
6. Robinson, E., J.M. Hunger, and M. Daly, *Perceived weight status and risk of weight gain across life in US and UK adults*. Int J Obes (Lond), 2015.
7. Haleem, D.J., *Investigations into the involvement of leptin in responses to stress*. Behavioural Pharmacology, 2014. **25**(5-6): p. 384-97.
8. Schellekens, H., et al., *Ghrelin signalling and obesity: at the interface of stress, mood and food reward*. Pharmacology and Therapeutics, 2012. **135**(3): p. 316-26.
9. Isasi, C.R., et al., *Psychosocial stress is associated with obesity and diet quality in Hispanic/Latino adults*. Annals of Epidemiology, 2015. **25**(2): p. 84-9.
10. Backe, E.M., et al., *The role of psychosocial stress at work for the development of cardiovascular diseases: a systematic review*. International Archives of Occupational and Environmental Health, 2012. **85**(1): p. 67-79.
11. Dutheil, F., et al., *JOBSTRESS study: comparison of heart rate variability in emergency physicians working a 24-hour shift or a 14-hour night shift - a randomized trial*. Int J Cardiol, 2012. **158**(2): p. 322-5.
12. Karason, K., et al., *Heart rate variability in obesity and the effect of weight loss*. American Journal of Cardiology, 1999. **83**(8): p. 1242-7.
13. Chintala, K.K., B.H. Krishna, and M.R. N, *Heart rate variability in overweight health care students: correlation with visceral fat*. J Clin Diagn Res, 2015. **9**(1): p. 1.
14. Tsuji, H., et al., *Impact of reduced heart rate variability on risk for cardiac events. The Framingham Heart Study*. Circulation, 1996. **94**(11): p. 2850-5.
15. Proietti, R., et al., *Mental stress and ischemic heart disease: evolving awareness of a complex association*. Future Cardiol, 2011. **7**(3): p. 425-37.
16. Elenkov, I.J., et al., *Cytokine dysregulation, inflammation and well-being*. Neuroimmunomodulation, 2005. **12**(5): p. 255-69.
17. Dutheil, F., et al., *Blood lipids and adipokines concentrations during a 6-month nutritional and physical activity intervention for metabolic syndrome treatment*. Lipids Health Dis, 2010. **9**: p. 148.
18. Bloom, L., et al., *Psychosocial outcomes of a non-dieting based positive body image community program for overweight adults: a pilot study*. J Eat Disord, 2013. **1**: p. 44.
19. Waysfeld, B., *[Psychological approaches to the obese]*. Presse Medicale, 2000. **29**(10): p. 556-63.
20. van der Klink, J.J., et al., *The benefits of interventions for work-related stress*. American Journal of Public Health, 2001. **91**(2): p. 270-6.

- 1
  - 2
  - 3
  - 4
  - 5
  - 6
  - 7
  - 8
  - 9
  - 10
  - 11
  - 12
  - 13
  - 14
  - 15
  - 16
  - 17
  - 18
  - 19
  - 20
  - 21
  - 22
  - 23
  - 24
  - 25
  - 26
  - 27
  - 28
  - 29
  - 30
  - 31
  - 32
  - 33
  - 34
  - 35
  - 36
  - 37
  - 38
  - 39
  - 40
  - 41
  - 42
  - 43
  - 44
  - 45
  - 46
  - 47
  - 48
  - 49
  - 50
  - 51
  - 52
  - 53
  - 54
  - 55
  - 56
  - 57
  - 58
  - 59
  - 60
21. Banz, W.J., et al., *Effects of resistance versus aerobic training on coronary artery disease risk factors*. *Exp Biol Med* (Maywood), 2003. **228**(4): p. 434-40.
22. Brinkborg, H., et al., *Acceptance and commitment therapy for the treatment of stress among social workers: a randomized controlled trial*. *Behaviour Research and Therapy*, 2011. **49**(6-7): p. 389-98.
23. Davies, W.R., *Mindful meditation: healing burnout in critical care nursing*. *Holistic Nursing Practice*, 2008. **22**(1): p. 32-6.
24. Cohen-Katz, J., et al., *The effects of mindfulness-based stress reduction on nurse stress and burnout: a quantitative and qualitative study*. *Holistic Nursing Practice*, 2004. **18**(6): p. 302-8.
25. Stults-Kolehmainen, M.A. and R. Sinha, *The effects of stress on physical activity and exercise*. *Sports Medicine*, 2014. **44**(1): p. 81-121.
26. Hansen, A.M., et al., *Physical activity, job demand-control, perceived stress-energy, and salivary cortisol in white-collar workers*. *International Archives of Occupational and Environmental Health*, 2010. **83**(2): p. 143-53.
27. Kiecolt-Glaser, J.K., *Stress, food, and inflammation: psychoneuroimmunology and nutrition at the cutting edge*. *Psychosomatic medicine*, 2010. **72**(4): p. 365.
28. Bhui, K.S., et al., *A synthesis of the evidence for managing stress at work: a review of the reviews reporting on anxiety, depression, and absenteeism*. *J Environ Public Health*, 2012. **2012**: p. 515874.
29. Bond, F.W. and D. Bunce, *The role of acceptance and job control in mental health, job satisfaction, and work performance*. *Journal of Applied Psychology*, 2003. **88**(6): p. 1057-67.
30. Tochikubo, O., et al., *Effects of insufficient sleep on blood pressure monitored by a new multibiomedical recorder*. *Hypertension*, 1996. **27**(6): p. 1318-24.
31. Khalfa, N., et al., *Heart rate regulation processed through wavelet analysis and change detection: some case studies*. *Acta Biotheoretica*, 2012. **60**(1-2): p. 109-29.
32. Marfell-Jones, M.J., A. Stewart, and J. de Ridder, *International standards for anthropometric assessment*. 2012.
33. Lang, R.M., et al., *Recommendations for cardiac chamber quantification by echocardiography in adults: an update from the American Society of Echocardiography and the European Association of Cardiovascular Imaging*. *Journal of the American Society of Echocardiography*, 2015. **28**(1): p. 1-39. e14.
34. Mor-Avi, V., et al., *Current and evolving echocardiographic techniques for the quantitative evaluation of cardiac mechanics: ASE/EAE consensus statement on methodology and indications: endorsed by the Japanese Society of Echocardiography*. *Journal of the American Society of Echocardiography*, 2011. **24**(3): p. 277-313.
35. Sornay-Rendu, E., et al., *Cortical and trabecular architecture are altered in postmenopausal women with fractures*. *Osteoporos Int*, 2009. **20**(8): p. 1291-7.
36. Boutroy, S., et al., *In vivo assessment of trabecular bone microarchitecture by high-resolution peripheral quantitative computed tomography*. *J Clin Endocrinol Metab*, 2005. **90**(12): p. 6508-15.
37. Stein, E.M., et al., *Abnormal microarchitecture and reduced stiffness at the radius and tibia in postmenopausal women with fractures*. *J Bone Miner Res*, 2010. **25**(12): p. 2572-81.
38. Kullback, S., *Information theory and statistics*. 1959, New York: John Wiley & Sons.
39. Steiger, J.H., *Tests for comparing elements of a correlation matrix*. *Psychological Bulletin*, 1980. **87**: p. 245-251.
40. Damilakis, J., et al., *Radiation exposure in X-ray-based imaging techniques used in osteoporosis*. *Eur Radiol*, 2010. **20**(11): p. 2707-14.
41. Fappa, E., et al., *Lifestyle intervention in the management of metabolic syndrome: could we improve adherence issues?* *Nutrition*, 2008. **24**(3): p. 286-91.

- 1  
2  
3 42. Courteix, D., et al., *Multilevel Approach of a 1-Year Program of Dietary and Exercise Interventions*  
4 *on Bone Mineral Content and Density in Metabolic Syndrome - the RESOLVE Randomized*  
5 *Controlled Trial*. PLoS One, 2015. **10**(9): p. e0136491.  
6  
7  
8  
9

10 **Figure Title:** ObestiStress protocol  
11

12 **Figure Abbreviation:** M months, D days  
13  
14  
15  
16  
17  
18  
19  
20  
21  
22  
23  
24  
25  
26  
27  
28  
29  
30  
31  
32  
33  
34  
35  
36  
37  
38  
39  
40  
41  
42  
43  
44  
45  
46  
47  
48  
49  
50  
51  
52  
53  
54  
55  
56  
57  
58  
59  
60

For peer review only

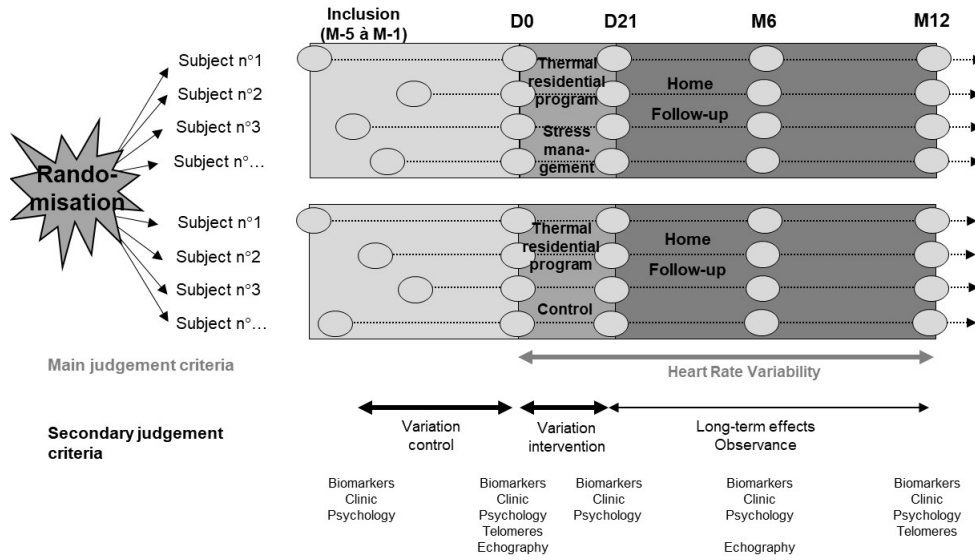

Title: The ObesiStress protocol  
M months, D day

105x59mm (300 x 300 DPI)

# Reporting checklist for protocol of a clinical trial.

Based on the SPIRIT guidelines.

## Instructions to authors

Complete this checklist by entering the page numbers from your manuscript where readers will find each of the items listed below.

Your article may not currently address all the items on the checklist. Please modify your text to include the missing information. If you are certain that an item does not apply, please write "n/a" and provide a short explanation.

Upload your completed checklist as an extra file when you submit to a journal.

In your methods section, say that you used the SPIRIT reporting guidelines, and cite them as:

Chan A-W, Tetzlaff JM, Altman DG, Laupacis A, Gøtzsche PC, Krleža-Jerić K, Hróbjartsson A, Mann H, Dickersin K, Berlin J, Doré C, Parulekar W, Summerskill W, Groves T, Schulz K, Sox H, Rockhold FW, Rennie D, Moher D. SPIRIT 2013 Statement: Defining standard protocol items for clinical trials. *Ann Intern Med.* 2013;158(3):200-207

|                                             |                     | Reporting Item                                                                                               | Page Number  |
|---------------------------------------------|---------------------|--------------------------------------------------------------------------------------------------------------|--------------|
| Title                                       | <a href="#">#1</a>  | Descriptive title identifying the study design, population, interventions, and, if applicable, trial acronym | Page 1       |
| Trial registration                          | <a href="#">#2a</a> | Trial identifier and registry name. If not yet registered, name of intended registry                         | Page 3       |
| Trial registration: data set                | <a href="#">#2b</a> | All items from the World Health Organization Trial Registration Data Set                                     |              |
| Protocol version                            | <a href="#">#3</a>  | Date and version identifier                                                                                  | Page 2       |
| Funding                                     | <a href="#">#4</a>  | Sources and types of financial, material, and other support                                                  | Page 14      |
| Roles and responsibilities: contributorship | <a href="#">#5a</a> | Names, affiliations, and roles of protocol contributors                                                      | Pages 1-2;14 |
| Roles and responsibilities:                 | <a href="#">#5b</a> | Name and contact information for the trial sponsor                                                           | Page 2       |

|    |                      |                      |                                                                                 |
|----|----------------------|----------------------|---------------------------------------------------------------------------------|
| 1  | sponsor contact      |                      |                                                                                 |
| 2  | information          |                      |                                                                                 |
| 3  |                      |                      |                                                                                 |
| 4  | Roles and            | <a href="#">#5c</a>  | Role of study sponsor and funders, if any, in study design; <b>Page 14</b>      |
| 5  | responsibilities:    |                      | collection, management, analysis, and interpretation of                         |
| 6  | sponsor and funder   |                      | data; writing of the report; and the decision to submit the                     |
| 7  |                      |                      | report for publication, including whether they will have                        |
| 8  |                      |                      | ultimate authority over any of these activities                                 |
| 9  |                      |                      |                                                                                 |
| 10 |                      |                      |                                                                                 |
| 11 |                      |                      |                                                                                 |
| 12 | Roles and            | <a href="#">#5d</a>  | Composition, roles, and responsibilities of the coordinating                    |
| 13 | responsibilities:    |                      | centre, steering committee, endpoint adjudication                               |
| 14 | committees           |                      | committee, data management team, and other individuals                          |
| 15 |                      |                      | or groups overseeing the trial, if applicable (see Item 21a                     |
| 16 |                      |                      | for data monitoring committee)                                                  |
| 17 |                      |                      |                                                                                 |
| 18 |                      |                      |                                                                                 |
| 19 |                      |                      |                                                                                 |
| 20 | Background and       | <a href="#">#6a</a>  | Description of research question and justification for <b>Page 5</b>            |
| 21 | rationale            |                      | undertaking the trial, including summary of relevant studies                    |
| 22 |                      |                      | (published and unpublished) examining benefits and harms                        |
| 23 |                      |                      | for each intervention                                                           |
| 24 |                      |                      |                                                                                 |
| 25 |                      |                      |                                                                                 |
| 26 |                      |                      |                                                                                 |
| 27 | Background and       | <a href="#">#6b</a>  | Explanation for choice of comparators                                           |
| 28 | rationale: choice of |                      |                                                                                 |
| 29 | comparators          |                      |                                                                                 |
| 30 |                      |                      |                                                                                 |
| 31 |                      |                      |                                                                                 |
| 32 | Objectives           | <a href="#">#7</a>   | Specific objectives or hypotheses <b>Page 5</b>                                 |
| 33 |                      |                      |                                                                                 |
| 34 |                      |                      |                                                                                 |
| 35 | Trial design         | <a href="#">#8</a>   | Description of trial design including type of trial (eg, parallel <b>Page 6</b> |
| 36 |                      |                      | group, crossover, factorial, single group), allocation ratio,                   |
| 37 |                      |                      | and framework (eg, superiority, equivalence, non-                               |
| 38 |                      |                      | inferiority, exploratory)                                                       |
| 39 |                      |                      |                                                                                 |
| 40 |                      |                      |                                                                                 |
| 41 |                      |                      |                                                                                 |
| 42 | Study setting        | <a href="#">#9</a>   | Description of study settings (eg, community clinic, <b>Page 6</b>              |
| 43 |                      |                      | academic hospital) and list of countries where data will be                     |
| 44 |                      |                      | collected. Reference to where list of study sites can be                        |
| 45 |                      |                      | obtained                                                                        |
| 46 |                      |                      |                                                                                 |
| 47 |                      |                      |                                                                                 |
| 48 | Eligibility criteria | <a href="#">#10</a>  | Inclusion and exclusion criteria for participants. If <b>Page 6</b>             |
| 49 |                      |                      | applicable, eligibility criteria for study centres and                          |
| 50 |                      |                      | individuals who will perform the interventions (eg,                             |
| 51 |                      |                      | surgeons, psychotherapists)                                                     |
| 52 |                      |                      |                                                                                 |
| 53 |                      |                      |                                                                                 |
| 54 |                      |                      |                                                                                 |
| 55 | Interventions:       | <a href="#">#11a</a> | Interventions for each group with sufficient detail to allow <b>Pages 7-</b>    |
| 56 | description          |                      | replication, including how and when they will be <b>8</b>                       |
| 57 |                      |                      | administered                                                                    |
| 58 |                      |                      |                                                                                 |
| 59 |                      |                      |                                                                                 |
| 60 |                      |                      |                                                                                 |



|    |                      |                      |                                                             |                  |
|----|----------------------|----------------------|-------------------------------------------------------------|------------------|
| 1  | Interventions:       | <a href="#">#11b</a> | Criteria for discontinuing or modifying allocated           |                  |
| 2  | modifications        |                      | interventions for a given trial participant (eg, drug dose  |                  |
| 3  |                      |                      | change in response to harms, participant request, or        |                  |
| 4  |                      |                      | improving / worsening disease)                              |                  |
| 5  |                      |                      |                                                             |                  |
| 6  |                      |                      |                                                             |                  |
| 7  | Interventions:       | <a href="#">#11c</a> | Strategies to improve adherence to intervention protocols,  |                  |
| 8  | adherence            |                      | and any procedures for monitoring adherence (eg, drug       |                  |
| 9  |                      |                      | tablet return; laboratory tests)                            |                  |
| 10 |                      |                      |                                                             |                  |
| 11 |                      |                      |                                                             |                  |
| 12 | Interventions:       | <a href="#">#11d</a> | Relevant concomitant care and interventions that are        |                  |
| 13 | concomitant care     |                      | permitted or prohibited during the trial                    |                  |
| 14 |                      |                      |                                                             |                  |
| 15 |                      |                      |                                                             |                  |
| 16 | Outcomes             | <a href="#">#12</a>  | Primary, secondary, and other outcomes, including the       | <b>Pages 8-</b>  |
| 17 |                      |                      | specific measurement variable (eg, systolic blood           | <b>11</b>        |
| 18 |                      |                      | pressure), analysis metric (eg, change from baseline, final |                  |
| 19 |                      |                      | value, time to event), method of aggregation (eg, median,   |                  |
| 20 |                      |                      | proportion), and time point for each outcome. Explanation   |                  |
| 21 |                      |                      | of the clinical relevance of chosen efficacy and harm       |                  |
| 22 |                      |                      | outcomes is strongly recommended                            |                  |
| 23 |                      |                      |                                                             |                  |
| 24 |                      |                      |                                                             |                  |
| 25 |                      |                      |                                                             |                  |
| 26 |                      |                      |                                                             |                  |
| 27 |                      |                      |                                                             |                  |
| 28 | Participant timeline | <a href="#">#13</a>  | Time schedule of enrolment, interventions (including any    | <b>Pages 6,</b>  |
| 29 |                      |                      | run-ins and washouts), assessments, and visits for          | <b>8, Figure</b> |
| 30 |                      |                      | participants. A schematic diagram is highly recommended     | <b>1</b>         |
| 31 |                      |                      | (see Figure)                                                |                  |
| 32 |                      |                      |                                                             |                  |
| 33 |                      |                      |                                                             |                  |
| 34 |                      |                      |                                                             |                  |
| 35 | Sample size          | <a href="#">#14</a>  | Estimated number of participants needed to achieve study    | <b>Pages 6-</b>  |
| 36 |                      |                      | objectives and how it was determined, including clinical    | <b>7</b>         |
| 37 |                      |                      | and statistical assumptions supporting any sample size      |                  |
| 38 |                      |                      | calculations                                                |                  |
| 39 |                      |                      |                                                             |                  |
| 40 |                      |                      |                                                             |                  |
| 41 |                      |                      |                                                             |                  |
| 42 | Recruitment          | <a href="#">#15</a>  | Strategies for achieving adequate participant enrolment to  | <b>Page 7</b>    |
| 43 |                      |                      | reach target sample size                                    |                  |
| 44 |                      |                      |                                                             |                  |
| 45 |                      |                      |                                                             |                  |
| 46 | Allocation: sequence | <a href="#">#16a</a> | Method of generating the allocation sequence (eg,           | <b>Page 6</b>    |
| 47 | generation           |                      | computer-generated random numbers), and list of any         |                  |
| 48 |                      |                      | factors for stratification. To reduce predictability of a   |                  |
| 49 |                      |                      | random sequence, details of any planned restriction (eg,    |                  |
| 50 |                      |                      | blocking) should be provided in a separate document that    |                  |
| 51 |                      |                      | is unavailable to those who enrol participants or assign    |                  |
| 52 |                      |                      | interventions                                               |                  |
| 53 |                      |                      |                                                             |                  |
| 54 |                      |                      |                                                             |                  |
| 55 |                      |                      |                                                             |                  |
| 56 |                      |                      |                                                             |                  |
| 57 | Allocation           | <a href="#">#16b</a> | Mechanism of implementing the allocation sequence (eg,      |                  |
| 58 | concealment          |                      | central telephone; sequentially numbered, opaque, sealed    |                  |
| 59 |                      |                      |                                                             |                  |
| 60 |                      |                      |                                                             |                  |

|    |                        |                      |                                                                |          |
|----|------------------------|----------------------|----------------------------------------------------------------|----------|
| 1  | mechanism              |                      | envelopes), describing any steps to conceal the sequence       |          |
| 2  |                        |                      | until interventions are assigned                               |          |
| 3  |                        |                      |                                                                |          |
| 4  | Allocation:            | <a href="#">#16c</a> | Who will generate the allocation sequence, who will enrol      |          |
| 5  | implementation         |                      | participants, and who will assign participants to              |          |
| 6  |                        |                      | interventions                                                  |          |
| 7  |                        |                      |                                                                |          |
| 8  |                        |                      |                                                                |          |
| 9  | Blinding (masking)     | <a href="#">#17a</a> | Who will be blinded after assignment to interventions (eg,     |          |
| 10 |                        |                      | trial participants, care providers, outcome assessors, data    |          |
| 11 |                        |                      | analysts), and how                                             |          |
| 12 |                        |                      |                                                                |          |
| 13 |                        |                      |                                                                |          |
| 14 | Blinding (masking):    | <a href="#">#17b</a> | If blinded, circumstances under which unblinding is            |          |
| 15 | emergency              |                      | permissible, and procedure for revealing a participant's       |          |
| 16 | unblinding             |                      | allocated intervention during the trial                        |          |
| 17 |                        |                      |                                                                |          |
| 18 |                        |                      |                                                                |          |
| 19 |                        |                      |                                                                |          |
| 20 | Data collection plan   | <a href="#">#18a</a> | Plans for assessment and collection of outcome, baseline,      | Pages 8- |
| 21 |                        |                      | and other trial data, including any related processes to       | 11       |
| 22 |                        |                      | promote data quality (eg, duplicate measurements, training     |          |
| 23 |                        |                      | of assessors) and a description of study instruments (eg,      |          |
| 24 |                        |                      | questionnaires, laboratory tests) along with their reliability |          |
| 25 |                        |                      | and validity, if known. Reference to where data collection     |          |
| 26 |                        |                      | forms can be found, if not in the protocol                     |          |
| 27 |                        |                      |                                                                |          |
| 28 |                        |                      |                                                                |          |
| 29 |                        |                      |                                                                |          |
| 30 |                        |                      |                                                                |          |
| 31 | Data collection plan:  | <a href="#">#18b</a> | Plans to promote participant retention and complete follow-    |          |
| 32 | retention              |                      | up, including list of any outcome data to be collected for     |          |
| 33 |                        |                      | participants who discontinue or deviate from intervention      |          |
| 34 |                        |                      | protocols                                                      |          |
| 35 |                        |                      |                                                                |          |
| 36 |                        |                      |                                                                |          |
| 37 |                        |                      |                                                                |          |
| 38 | Data management        | <a href="#">#19</a>  | Plans for data entry, coding, security, and storage,           |          |
| 39 |                        |                      | including any related processes to promote data quality        |          |
| 40 |                        |                      | (eg, double data entry; range checks for data values).         |          |
| 41 |                        |                      | Reference to where details of data management                  |          |
| 42 |                        |                      | procedures can be found, if not in the protocol                |          |
| 43 |                        |                      |                                                                |          |
| 44 |                        |                      |                                                                |          |
| 45 |                        |                      |                                                                |          |
| 46 | Statistics: outcomes   | <a href="#">#20a</a> | Statistical methods for analysing primary and secondary        | Pages    |
| 47 |                        |                      | outcomes. Reference to where other details of the              | 11-12    |
| 48 |                        |                      | statistical analysis plan can be found, if not in the protocol |          |
| 49 |                        |                      |                                                                |          |
| 50 |                        |                      |                                                                |          |
| 51 |                        |                      |                                                                |          |
| 52 | Statistics: additional | <a href="#">#20b</a> | Methods for any additional analyses (eg, subgroup and          | Pages    |
| 53 | analyses               |                      | adjusted analyses)                                             | 11-12    |
| 54 |                        |                      |                                                                |          |
| 55 |                        |                      |                                                                |          |
| 56 | Statistics: analysis   | <a href="#">#20c</a> | Definition of analysis population relating to protocol non-    | Pages    |
| 57 | population and         |                      | adherence (eg, as randomised analysis), and any                | 11-12    |
| 58 | missing data           |                      | statistical methods to handle missing data (eg, multiple       |          |
| 59 |                        |                      |                                                                |          |
| 60 |                        |                      |                                                                |          |

imputation)

|    |                    |                      |                                                                 |
|----|--------------------|----------------------|-----------------------------------------------------------------|
| 1  |                    |                      |                                                                 |
| 2  |                    |                      |                                                                 |
| 3  | Data monitoring:   | <a href="#">#21a</a> | Composition of data monitoring committee (DMC);                 |
| 4  | formal committee   |                      | summary of its role and reporting structure; statement of       |
| 5  |                    |                      | whether it is independent from the sponsor and competing        |
| 6  |                    |                      | interests; and reference to where further details about its     |
| 7  |                    |                      | charter can be found, if not in the protocol. Alternatively, an |
| 8  |                    |                      | explanation of why a DMC is not needed                          |
| 9  |                    |                      |                                                                 |
| 10 |                    |                      |                                                                 |
| 11 |                    |                      |                                                                 |
| 12 | Data monitoring:   | <a href="#">#21b</a> | Description of any interim analyses and stopping                |
| 13 | interim analysis   |                      | guidelines, including who will have access to these interim     |
| 14 |                    |                      | results and make the final decision to terminate the trial      |
| 15 |                    |                      |                                                                 |
| 16 |                    |                      |                                                                 |
| 17 | Harms              | <a href="#">#22</a>  | Plans for collecting, assessing, reporting, and managing        |
| 18 |                    |                      | solicited and spontaneously reported adverse events and         |
| 19 |                    |                      | other unintended effects of trial interventions or trial        |
| 20 |                    |                      | conduct                                                         |
| 21 |                    |                      |                                                                 |
| 22 |                    |                      |                                                                 |
| 23 |                    |                      |                                                                 |
| 24 | Auditing           | <a href="#">#23</a>  | Frequency and procedures for auditing trial conduct, if any,    |
| 25 |                    |                      | and whether the process will be independent from                |
| 26 |                    |                      | investigators and the sponsor                                   |
| 27 |                    |                      |                                                                 |
| 28 |                    |                      |                                                                 |
| 29 |                    |                      |                                                                 |
| 30 | Research ethics    | <a href="#">#24</a>  | Plans for seeking research ethics committee / institutional     |
| 31 | approval           |                      | review board (REC / IRB) approval                               |
| 32 |                    |                      |                                                                 |
| 33 |                    |                      |                                                                 |
| 34 | Protocol           | <a href="#">#25</a>  | Plans for communicating important protocol modifications        |
| 35 | amendments         |                      | (eg, changes to eligibility criteria, outcomes, analyses) to    |
| 36 |                    |                      | relevant parties (eg, investigators, REC / IRBs, trial          |
| 37 |                    |                      | participants, trial registries, journals, regulators)           |
| 38 |                    |                      |                                                                 |
| 39 |                    |                      |                                                                 |
| 40 | Consent or assent  | <a href="#">#26a</a> | Who will obtain informed consent or assent from potential       |
| 41 |                    |                      | trial participants or authorised surrogates, and how (see       |
| 42 |                    |                      | Item 32)                                                        |
| 43 |                    |                      |                                                                 |
| 44 |                    |                      |                                                                 |
| 45 |                    |                      |                                                                 |
| 46 | Consent or assent: | <a href="#">#26b</a> | Additional consent provisions for collection and use of         |
| 47 | ancillary studies  |                      | participant data and biological specimens in ancillary          |
| 48 |                    |                      | studies, if applicable                                          |
| 49 |                    |                      |                                                                 |
| 50 |                    |                      |                                                                 |
| 51 | Confidentiality    | <a href="#">#27</a>  | How personal information about potential and enrolled           |
| 52 |                    |                      | participants will be collected, shared, and maintained in       |
| 53 |                    |                      | order to protect confidentiality before, during, and after the  |
| 54 |                    |                      | trial                                                           |
| 55 |                    |                      |                                                                 |
| 56 |                    |                      |                                                                 |
| 57 |                    |                      |                                                                 |
| 58 | Declaration of     | <a href="#">#28</a>  | Financial and other competing interests for principal           |
| 59 |                    |                      |                                                                 |
| 60 |                    |                      |                                                                 |

Page 24

Page 13

Page 14

|    |                       |                      |                                                                 |
|----|-----------------------|----------------------|-----------------------------------------------------------------|
| 1  | interests             |                      | investigators for the overall trial and each study site         |
| 2  |                       |                      |                                                                 |
| 3  | Data access           | <a href="#">#29</a>  | Statement of who will have access to the final trial dataset,   |
| 4  |                       |                      | and disclosure of contractual agreements that limit such        |
| 5  |                       |                      | access for investigators                                        |
| 6  |                       |                      |                                                                 |
| 7  |                       |                      |                                                                 |
| 8  | Ancillary and post    | <a href="#">#30</a>  | Provisions, if any, for ancillary and post-trial care, and for  |
| 9  | trial care            |                      | compensation to those who suffer harm from trial                |
| 10 |                       |                      | participation                                                   |
| 11 |                       |                      |                                                                 |
| 12 |                       |                      |                                                                 |
| 13 | Dissemination policy: | <a href="#">#31a</a> | Plans for investigators and sponsor to communicate trial        |
| 14 | trial results         |                      | results to participants, healthcare professionals, the public,  |
| 15 |                       |                      | and other relevant groups (eg, via publication, reporting in    |
| 16 |                       |                      | results databases, or other data sharing arrangements),         |
| 17 |                       |                      | including any publication restrictions                          |
| 18 |                       |                      |                                                                 |
| 19 |                       |                      |                                                                 |
| 20 |                       |                      |                                                                 |
| 21 | Dissemination policy: | <a href="#">#31b</a> | Authorship eligibility guidelines and any intended use of       |
| 22 | authorship            |                      | professional writers                                            |
| 23 |                       |                      |                                                                 |
| 24 |                       |                      |                                                                 |
| 25 | Dissemination policy: | <a href="#">#31c</a> | Plans, if any, for granting public access to the full protocol, |
| 26 | reproducible          |                      | participant-level dataset, and statistical code                 |
| 27 | research              |                      |                                                                 |
| 28 |                       |                      |                                                                 |
| 29 |                       |                      |                                                                 |
| 30 | Informed consent      | <a href="#">#32</a>  | Model consent form and other related documentation given        |
| 31 | materials             |                      | to participants and authorised surrogates                       |
| 32 |                       |                      |                                                                 |
| 33 |                       |                      |                                                                 |
| 34 | Biological specimens  | <a href="#">#33</a>  | Plans for collection, laboratory evaluation, and storage of     |
| 35 |                       |                      | biological specimens for genetic or molecular analysis in       |
| 36 |                       |                      | the current trial and for future use in ancillary studies, if   |
| 37 |                       |                      | applicable                                                      |
| 38 |                       |                      |                                                                 |
| 39 |                       |                      |                                                                 |
| 40 |                       |                      |                                                                 |

Page 13

41 The SPIRIT checklist is distributed under the terms of the Creative Commons Attribution License CC-  
 42 BY-ND 3.0. This checklist can be completed online using <https://www.goodreports.org/>, a tool made  
 43 by the [EQUATOR Network](#) in collaboration with [Penelope.ai](#)  
 44  
 45  
 46  
 47  
 48  
 49  
 50  
 51  
 52  
 53  
 54  
 55  
 56  
 57  
 58  
 59  
 60

# BMJ Open

## ObesiStress: Stress Management in Obesity during a thermal spa residential program – The protocol of a randomized controlled trial study.

|                               |                                                                                                                                                                                                                                                                                                                                                                                                                                                                                                                                                                                                                                                                                                                                                                                                                                                                                                                                                                                                                                                                                                                                                                                                                                                                                                                                                                                                                                                                                                                                                                                                                                                                                                                                                                                                                                                                                                                                                                                                                                                                                                                                                                                                                                |
|-------------------------------|--------------------------------------------------------------------------------------------------------------------------------------------------------------------------------------------------------------------------------------------------------------------------------------------------------------------------------------------------------------------------------------------------------------------------------------------------------------------------------------------------------------------------------------------------------------------------------------------------------------------------------------------------------------------------------------------------------------------------------------------------------------------------------------------------------------------------------------------------------------------------------------------------------------------------------------------------------------------------------------------------------------------------------------------------------------------------------------------------------------------------------------------------------------------------------------------------------------------------------------------------------------------------------------------------------------------------------------------------------------------------------------------------------------------------------------------------------------------------------------------------------------------------------------------------------------------------------------------------------------------------------------------------------------------------------------------------------------------------------------------------------------------------------------------------------------------------------------------------------------------------------------------------------------------------------------------------------------------------------------------------------------------------------------------------------------------------------------------------------------------------------------------------------------------------------------------------------------------------------|
| Journal:                      | <i>BMJ Open</i>                                                                                                                                                                                                                                                                                                                                                                                                                                                                                                                                                                                                                                                                                                                                                                                                                                                                                                                                                                                                                                                                                                                                                                                                                                                                                                                                                                                                                                                                                                                                                                                                                                                                                                                                                                                                                                                                                                                                                                                                                                                                                                                                                                                                                |
| Manuscript ID                 | bmjopen-2018-027058.R1                                                                                                                                                                                                                                                                                                                                                                                                                                                                                                                                                                                                                                                                                                                                                                                                                                                                                                                                                                                                                                                                                                                                                                                                                                                                                                                                                                                                                                                                                                                                                                                                                                                                                                                                                                                                                                                                                                                                                                                                                                                                                                                                                                                                         |
| Article Type:                 | Protocol                                                                                                                                                                                                                                                                                                                                                                                                                                                                                                                                                                                                                                                                                                                                                                                                                                                                                                                                                                                                                                                                                                                                                                                                                                                                                                                                                                                                                                                                                                                                                                                                                                                                                                                                                                                                                                                                                                                                                                                                                                                                                                                                                                                                                       |
| Date Submitted by the Author: | 23-May-2019                                                                                                                                                                                                                                                                                                                                                                                                                                                                                                                                                                                                                                                                                                                                                                                                                                                                                                                                                                                                                                                                                                                                                                                                                                                                                                                                                                                                                                                                                                                                                                                                                                                                                                                                                                                                                                                                                                                                                                                                                                                                                                                                                                                                                    |
| Complete List of Authors:     | <p>DUTHEIL, Frédéric; Occupational Medicine, University Hospital CHU G. Montpied; Australian Catholic University, Faculty of Health, School of Exercise Science</p> <p>CHAPLAIS, Elodie; Australian Catholic University, School of Exercise Science; University of Lorraine; DevAH Laboratory (EA 3450), Exercise Sciences</p> <p>VILMANT, Audrey; Occupational Medicine, University Hospital CHU G. Montpied</p> <p>COURTEIX, Daniel; Laboratoire AME2P - Université Clermont Auvergne; Australian Catholic University, School of Exercise Science</p> <p>DUCHE, Pascale; AME2P Laboratory - Université Clermont Auvergne</p> <p>ABERGEL, Armand; Université Clermont Auvergne, CNRS, UMR 6284, University Hospital of Clermont-Ferrand, CHU Clermont-Ferrand, Hepatology Gastroenterology</p> <p>PFABIGAN, Daniela M. ; School of Psychological and Cognitive Sciences, PKU-IDG/McGovern Institute for Brain Research, Beijing Key Laboratory of Behavior and Mental Health, Peking University</p> <p>HAN, Shihui; School of Psychological and Cognitive Sciences, PKU-IDG/McGovern Institute for Brain Research, Beijing Key Laboratory of Behavior and Mental Health, Peking University</p> <p>MONDILLON, Laurie; University Clermont Auvergne, and LAPSCO-CNRS, Psychology</p> <p>VALLET, Guillaume T.; Université Clermont Auvergne, CNRS, LaPSCo, Physiological and Psychosocial Stress</p> <p>Mermillod, Martial; Centre Hospitalier Universitaire Grenoble Alpes</p> <p>BOUDET, Gil; Occupational Medicine, University Hospital CHU G. Montpied</p> <p>Obert, Philippe; University of Avignon, Laboratory of Pharm-Ecology Cardiovascular EA4278</p> <p>Izem, Omar; Laboratory of Cardiovascular Pharm-ecology (LaPEC EA4278), Avignon University</p> <p>MIOLANNE-DEBOUIT, Magalie; University Hospital of Clermont-Ferrand, CHU Clermont-Ferrand, Unit of Human Nutrition</p> <p>Farigon, Nicolas; University Hospital of Clermont-Ferrand, CHU Clermont-Ferrand, Unit of Human Nutrition</p> <p>Pereira, Bruno; University Hospital CHU Clermont-Ferrand,</p> <p>Boirie, Yves; Université Clermont Auvergne, INRA, CRNH, University Hospital of Clermont-Ferrand, CHU Clermont-Ferrand, Unit of Human Nutrition</p> |

1  
2  
3  
4  
5  
6  
7  
8  
9  
10  
11  
12  
13  
14  
15  
16  
17  
18  
19  
20  
21  
22  
23  
24  
25  
26  
27  
28  
29  
30  
31  
32  
33  
34  
35  
36  
37  
38  
39  
40  
41  
42  
43  
44  
45  
46  
47  
48  
49  
50  
51  
52  
53  
54  
55  
56  
57  
58  
59  
60

|                                    |                                                                       |
|------------------------------------|-----------------------------------------------------------------------|
| <b>Primary Subject Heading</b> :   | Cardiovascular medicine                                               |
| <b>Secondary Subject Heading</b> : | Nutrition and metabolism, Sports and exercise medicine, Public health |
| <b>Keywords</b> :                  | obesity, stress, prevention, heart rate variability, spa bath         |
|                                    |                                                                       |

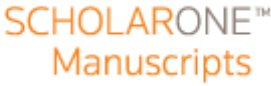

# ObesiStress: Stress Management in Obesity during a thermal spa residential program – The protocol of a randomized controlled trial study

Frédéric DUTHEIL<sup>1,2</sup>, Elodie CHAPLAIS<sup>2,4,5,15</sup>, Audrey Vilmant<sup>1</sup>, Daniel COURTEIX<sup>2,3</sup>, Pascale DUCHE<sup>3</sup>, Armand ABERGEL<sup>6</sup>, Daniela M. PFABIGAN<sup>7</sup>, Shihui HAN<sup>7</sup>, Laurie MONDILLON<sup>8</sup>, Guillaume T. VALLET<sup>8</sup>, Martial MERMILLOD<sup>9,10</sup>, Gil BOUDET<sup>1</sup>, Philippe OBERT<sup>2,11</sup>, Omar IZEM<sup>11</sup>, Magalie MIOLANNE-DEBOUIT<sup>12</sup>, Nicolas FARIGON<sup>12</sup>, Bruno PEREIRA<sup>13</sup>, Yves BOIRIE<sup>14</sup>

## Authors' affiliations:

<sup>1</sup> Université Clermont Auvergne, CNRS, LaPSCo, Physiological and Psychosocial Stress, University Hospital of Clermont-Ferrand, CHU Clermont-Ferrand, Preventive and Occupational Medicine, WittyFit, Clermont-Ferrand, France

<sup>2</sup> Australian Catholic University, Faculty of Health, School of Exercise Science, Melbourne, Victoria 3065 Australia

<sup>3</sup> Université Clermont Auvergne, Laboratory of the Metabolic Adaptations to Exercise under Physiological and Pathological Conditions (AME2P - EA 3533), Clermont-Ferrand, France

<sup>4</sup> Australian Catholic University, Faculty of Health Science, School of Exercise Science, Strathfield, NSW 2135 Australia

<sup>5</sup> University Hospital of Clermont-Ferrand, CHU Clermont-Ferrand, Biostatistics Unit, Clinical research and Innovation Department (DRCI), Clermont-Ferrand, France

<sup>6</sup> Université Clermont Auvergne, CNRS, UMR 6284, University Hospital of Clermont-Ferrand, CHU Clermont-Ferrand, Hepatology Gastroenterology, Clermont-Ferrand, France

<sup>7</sup> School of Psychological and Cognitive Sciences, PKU-IDG/McGovern Institute for Brain Research, Beijing Key Laboratory of Behavior and Mental Health, Peking University, Beijing, China

<sup>8</sup> Université Clermont Auvergne, CNRS, LaPSCo, Physiological and Psychosocial Stress, Clermont-Ferrand, France

<sup>9</sup> Grenoble Alpes University, LNPC, CNRS, Grenoble, France

<sup>10</sup> Institut Universitaire de France, Paris, France

<sup>11</sup> Laboratory of Cardiovascular Pharm-ecology (LaPEC EA4278), Avignon University, Avignon, France

<sup>12</sup> University Hospital of Clermont-Ferrand, CHU Clermont-Ferrand, Unit of Human Nutrition, Clermont-Ferrand, France.

1  
2  
3 <sup>13</sup> University Hospital of Clermont-Ferrand, CHU Clermont-Ferrand, Biostatistics Unit, Clinical  
4 research and Innovation Department (DRCI), Clermont-Ferrand, France

5  
6 <sup>14</sup> Université Clermont Auvergne, INRA, CRNH, University Hospital of Clermont-Ferrand, CHU  
7 Clermont-Ferrand, Unit of Human Nutrition, Clermont-Ferrand, France.

8  
9 <sup>15</sup> Université de Lorraine, Laboratory "Development, Adaption and Disability" (DevAH - EA 3450),  
10 Nancy, France  
11  
12  
13

14 **Corresponding author** – CHAPLAIS Elodie (PhD), Université de Lorraine, Laboratory  
15 "Development, Adaption and Disability" (EA 3450), Faculty of Sports Sciences and Faculty of  
16 Medicine, 9 avenue de la Forêt de Haye, CS 50184, F-54505 Vandœuvre-lès-Nancy, France;  
17 elodie.chaplais@acu.edu.au  
18  
19  
20  
21  
22  
23

24 **Keywords:** obesity, stress, prevention, heart rate variability, spa bath

25  
26 **Word count:** 4023 words (without abstract + strength and limitation)

27  
28 **Number of figure:** 1

29  
30 **Protocol version:** version 1, 10/2018  
31  
32  
33  
34  
35  
36  
37  
38  
39  
40  
41  
42  
43  
44  
45  
46  
47  
48  
49  
50  
51  
52  
53  
54  
55  
56  
57  
58  
59  
60



## Abstract

**Introduction:** Stress and obesity are two public health issues. The relationships between obesity and stress are biological via the action of stress on the major hormones regulating appetite (leptin, ghrelin). Many spa resorts are specialized in the treatment of obesity in France but actually no thermal spa proposes a specific program to manage stress in obesity. The ObesiStress protocol was designed to offer thermal spa residential program of stress management in the treatment of obesity, which implement stress management strategies as suggested by International recommendations.

**Methods and analysis:** 140 overweight or obese participants with Body Mass Index (BMI)  $>25$  kg.m<sup>-2</sup> and aged over 18 years will be recruited. Participants will be randomized into two groups: a control group of usual practice (restrictive diet, physical activity and thermal spa treatment) and an intervention group with a stress management in addition to the usual practice. In the present protocol, parameters will be measured on five occasions (at inclusion, at the beginning of the spa (day 0), at the end of the spa (day 21), at 6 and 12 months). The study will assess participants' heart rate variability, cardiac remodeling and function, electrodermal activity, blood markers, anthropometry profile, body composition, psychology and quality of life via questionnaires and bone parameters.

**Ethics and dissemination:** The ObesiStress protocol complies with the Ethics guidelines for Clinical Research and has been approved by the Ethic Committee (CPP Sud-Est VI, Clermont-Ferrand - ANSM: 2016-A01774-47). This study would highlight the effect of a 21 days thermal spa residential program of stress management in obesity will exhibit its efficacy through objective measures of well-being and cardiovascular morbidity. Results will be disseminated at several research conferences and published articles in peer-reviewed journals.

**Trial Registration:** NCT 03578757

**Strengths and limitations of this study:**

- Reliability and validity of a 21 days specific thermal spa residential program on stress management in the treatment of obesity
- Better comprehension of psychological and psychological mechanisms involved in stress management in obesity.
- 12-months mixt gender longitudinal study
- Unable to accurately account for the long-term cost-effective benefits of the study

For peer review only

## Introduction

Stress and obesity are two public health issues.<sup>1 2</sup> Stress can lead to obesity via inappropriate eating behaviors.<sup>3</sup> In addition, obesity is a major stress factor.<sup>4</sup> Furthermore, stressed people are also those who have the greatest difficulties to lose weight.<sup>5</sup> The relationships between obesity and stress are biological via the action of stress on the major hormones regulating appetite (leptin, ghrelin).<sup>6 7</sup> The relationships between obesity and stress are so strong that proposals of international recommendation suggest to implement stress management programs in obesity for a sustainable weight loss.<sup>8</sup>

Among the multiple physical and psychological consequences of stress and obesity, increased mortality and cardiovascular morbidity seem the main concern.<sup>9</sup> Stress and obesity alter the functioning of the autonomic nervous system.<sup>10-12</sup> A deregulation of sympatho-vagal balance is a major factor of morbidity cardiovascular mortality.<sup>13</sup> Conveniently, the sympatho-vagal balance can be measured easily and pain-free by heart rate variability (HRV), which is a biomarker of both stress and morbidity/mortality.<sup>10 14 15</sup> Stress and obesity also cause arterial ischemic pathology,<sup>16</sup> via complex mechanisms involving changes of endothelial and arterial atherosclerosis.<sup>16</sup> These microvascular changes are linked to systemic inflammation caused by stress<sup>17</sup> and obesity.<sup>18</sup>

The thermal spa resort of Vichy, as well as other some spa centers in France, have already an expertise in obesity treatment by physical activity, diet, and hydrotherapy. However, there are no spa resort centers which has ever proposed to include a stress management program in obesity treatment. Non-pharmacological stress management can be done through psychological interventions (i.e. physical<sup>19</sup> and psychoanalytic approaches<sup>20</sup>, cognitive behavioral therapy,<sup>21</sup> acceptance and commitment therapy,<sup>22 23</sup> or mindfulness.<sup>24 25</sup>), physical activity,<sup>26 27</sup> and improvement of eating disorders induced by stress.<sup>28</sup> The benefits of physical activity on the physical and mental health are indisputable, at any age, and with any activity.<sup>29</sup>

The main hypothesis of this project is that a thermal spa residential program (21 days) of stress management in obesity will exhibit its efficacy through objective measures of well-being and cardiovascular morbidity, via a randomised controlled design comparing a group with stress management and a group without stress management (both groups will benefit from the same spa treatments, physical activity, and diet).

## Objectives

The main objective will be to assess the ability of a 21 days spa residential program of stress management in the treatment of obesity on increasing heart rate variability, a biomarker of both stress and morbidity/mortality.

Secondary outcomes will be (1) to demonstrate an improvement in stress- and obesity-related variables following the short spa residential program, (2) to study the influence of genetic polymorphisms on stress, obesity, and on the response to our stress management program, (3) to examine the relationship between stress- and obesity-related variables, (4) to propose a salient biomarker or a salient composite index of biomarkers of stress in obesity and (5) to study the effect of observance to the program during the follow-up on stress- and obesity-related variables.

## Methods

**Protocol design:** This one-year randomized controlled study with repeated measures on five occasions (inclusion, at the start, at the end of the spa program, at 6 and 12 months), will allow us to understand the effect of a 21 days spa residential program of stress management in the treatment of obesity especially through measures of well-being and cardiovascular morbidity.

For this study, two randomized groups of overweight or obese participants will be compared: one receiving a 21 days usual thermal spa residential program, and one receiving a 21 days usual thermal spa residential program plus a psychological intervention (Figure1).

### **Randomisation**

Randomization will be stratified by BMI category (25-30, 30-35, >35), sex, and level of stress (visual analog scale of stress <50, between 50 and 80, >80), using minimization approach. A permuted-block randomization (i.e. random block sizes) will be conducted using a computer-generated random allocation (Stata software, version 13, StataCorp, College Station, US), with a 1:1 ratio allocation,

1  
2  
3 ensuring complete randomness of the assignment of a participant to each randomized group. To  
4  
5 guarantee concealment of allocation, the participants will be randomized after it is clear that they have  
6  
7 met the inclusion criteria and have provided written consent.  
8  
9

### 10 11 ***Selection criteria:***

12  
13 ***Inclusion criteria:*** Volunteers will be overweight or obese participants aged over 18 years, who wish  
14  
15 to follow a spa thermal residential program for the treatment of obesity. We will also promote the study  
16  
17 by advertisements in local newspaper and on radio. Volunteers will be screened by phone interview or  
18  
19 directly by spa physicians. Participants must have a stable weight during the last three months, with no  
20  
21 cardiac, hepatic, renal or endocrine diseases uncontrolled.<sup>2</sup> Stress at baseline will not be an inclusion  
22  
23 criteria but an explanatory/independent variable. In compliance with Human Ethics guidelines,  
24  
25 participants will have to be covered by a social health insurance and will have to sign consent forms.  
26  
27

28  
29 ***Exclusion criteria:*** Volunteers participating in the study will be excluded if major treatment and/or  
30  
31 protocol deviations are observed.<sup>14</sup> Drugs and medical conditions that significantly affect the primary  
32  
33 outcome (heart rate variability) will also be exclusion criteria (e.g. alpha or beta-blockers; arrhythmias  
34  
35 or conduction disorders such as bundle branch block, atrioventricular heart block).<sup>30</sup> Bariatric surgery is  
36  
37 also an exclusion criteria.  
38  
39

40  
41 ***Power analysis:*** The rationale for the sample size calculation is based on HRV which is a biomarker of  
42  
43 both stress and morbidity/mortality.<sup>10 14 15</sup> In particular, within multiple parameters of HRV, we  
44  
45 considered the log Low-Frequency/High-Frequency (LF/HF) for sample size calculation because it is  
46  
47 the parameter that traditionally represents sympathovagal balance (see description of LF/HF below in  
48  
49 the description of the primary outcome section).<sup>10 14</sup> The log LF/HF with low values associated with a  
50  
51 good adaptation of the autonomic nervous system. According to our results from a pilot study (data not  
52  
53 published),<sup>2</sup> we hope to highlight an absolute difference of 12% between groups concerning the decrease  
54  
55 of log LF/HF at one year after the stress management program. For a standard-deviation at 20%, the  
56  
57 expected size will be around 0.60. For a two-sided type I error of 5%, we need to include 59 participants  
58  
59  
60

1  
2  
3 by group to achieve a statistical power equals 90%. Finally, to take into account lost to follow-up, it is  
4  
5 proposed to recruit 70 patients per arm.  
6  
7  
8

9 **Participants:** As previously stated participants engaged in this protocol will be mixed gender overweight  
10 or obese volunteers aged over 18 years. Following approval from Ethic committees, and based on our  
11 calculation, a total of 70 volunteers per group (i.e. 140 in total) will be enrolled to account for potential  
12 dropouts. All participants will be given written information regarding the project and will have to signed  
13 consent forms before enrollment. Participants will be recruited through the usual clients of the spa resort  
14 of Vichy, through health-care workers (physicians, dieticians, physiotherapist, etc.), or through  
15 advertisements. Inclusions will be realized at the CHU Clermont-Ferrand or at the thermal spa resort of  
16 Vichy.  
17  
18  
19  
20  
21  
22  
23  
24  
25  
26  
27

28 **Usual thermal spa care:** All participants will benefits a usual practice thermal spa treatment combining  
29 corrections of eating disorders (and a negative energy balance of 500 kcal/day), physical activity (2h30  
30 per day, minimum), thermal spa treatment (2h per day, minimum), and health education (1h30 per day,  
31 minimum: cooking, nutrition and physical activity classes...). Physical activity will be diverse  
32 (endurance, strength, circuit training) and personalized to the target of each participant.  
33  
34  
35  
36  
37  
38  
39  
40

41 **Psychological interventions:** Participants randomized to the intervention group will benefit from  
42 psychological interventions based on validated approaches of stress (3 x 1h30 per week i.e. 9 sessions  
43 in total). Participants will attend psychological sessions by group of less than 10 individuals. Individual  
44 meeting with the psychologist will occur at least twice: at the beginning of the residential program and  
45 at the end. Psychological interventions will include various validated approaches of work-related stress:  
46 physical<sup>19</sup> and psychoanalytic<sup>20</sup> approaches, cognitive behavioral therapy,<sup>21</sup> acceptance and  
47 commitment therapy,<sup>23 31</sup> mindfulness,<sup>24 25</sup> etc. Participants will have to acquire techniques in order to  
48 be autonomous and pursue at-home psychological training. The 9 psychological sessions will be the  
49 following: 1) Stress management and lack of self-confidence, 2) cognitive behavioral therapy, 3) Body-  
50 centered approach: body language, 4) Management of emotions, 5) Identity approach: concept and self-  
51  
52  
53  
54  
55  
56  
57  
58  
59  
60

1  
2  
3 image, 6) Cognitive approach (information processing), 7) Sophrology – relaxation, 8) Food and  
4 addictive behavior, and 9) Psychopathological approach and anxiety disorders. Each session will be  
5 constructed and validated by a psychologist specialized in the field of the session and already working  
6 in the management of obese individuals. The aim is to build a psychological program that can be easily  
7 replicated for long term used after evidence based medicine proof of success of our program.  
8  
9  
10  
11  
12

13  
14  
15  
16 ***Follow-up:*** After the intervention phase of the study, participants will undergo a one-year at-home  
17 follow-up with measures at 6 and 12 months.  
18

19  
20  
21  
22 ***Measurements:*** Each participants will perform a battery of tests (described below). Data collection will  
23 be performed 5 times as previously described (inclusion, at the start, at the end of the spa program, at 6  
24 and 12 months), except for DXA and pQCT which will be performed at inclusion and after 12 months,  
25 cardiac remodeling and function which will be performed at inclusion and after 6 months.  
26  
27  
28  
29

30  
31  
32 ***Primary outcome:***

33  
34 ***Heart rate variability:*** Our primary outcome will be changes in HRV parameters. HRV parameters will  
35 be assessed during 26 hours with a heart rate transmitter belt simply positioned on the chest, with a 26h  
36 recording time, a beat per minute within a 25-240 range, and respiratory rate within a 3-70 range  
37 (Zephyr™ BioHarness™ BT, Zephyr Technology, Annapolis, USA). The HRV data will be examined  
38 according to the recommendations of the European Society of Cardiology and the North American  
39 Society (Task Force). HRV will be explored in time and frequency domains.<sup>32</sup> The methodology  
40 developed by our team will also be applied.<sup>33</sup> Premature beats will be visually checked and automatically  
41 discarded. In time domain, we will analyze R-R intervals, standard deviation of R-R intervals (SDNN),  
42 square root of the mean squared difference of successive R-R intervals (rMSSD), number of adjacent  
43 N-N differing by more than 50 milliseconds divided by the total number of N-N intervals (pNN50). The  
44 rMSSD and pNN50 are associated with high-frequency power (HF) and hence parasympathetic activity.  
45 In the spectral domain, we will analyze low-frequency (LF; 0.04–0.15 Hz) and high-frequency (0.15–  
46 0.4 Hz) power. LF is an index of both sympathetic and parasympathetic activity, and HF represents the  
47  
48  
49  
50  
51  
52  
53  
54  
55  
56  
57  
58  
59  
60

1  
2  
3 main efferent parasympathetic (vagal) activity to the sinus node. Very low frequency (VLF; 0.003–0.04  
4 Hz) partially reflects variation within activity of the renin–angiotensin system, thermoregulatory  
5 mechanisms, and function of peripheral chemoreceptors. LF and HF will also be assessed in normalised  
6 units (nu) i.e. the relative value of each power component in proportion to the total power minus the  
7 VLF component. Thus, LFnu and HFnu were proposed to represent best sympathetic and  
8 parasympathetic activity, respectively. The LF/HF ratio, i.e. the sympathovagal balance, will also be  
9 calculated.<sup>14</sup>  
10  
11  
12  
13  
14  
15  
16  
17  
18  
19

### 20 ***Secondary outcomes :***

21 Table 1 synthetize the secondary outcomes of the project.

22  
23 *Anthropometry and clinical parameters* will be measured such as height (*m*), body mass (*kg*), or blood  
24 pressure (*mmHg*). Waist circumference (*cm*) was measured at mid-abdomen, midpoint between sub-  
25 costal and supra-iliac landmarks, according to the World Health Organization protocol.<sup>34</sup>  
26  
27  
28  
29

30 *Body Composition:* Body composition (muscle mass and fat mass) will be measured by DXA (DXA,  
31 QDR-4500A, Hologic, Inc., Waltham, MA)<sup>35</sup> and by impedancemeter.<sup>36</sup>  
32  
33

34 *Biomarkers of stress and cardiovascular risk:* Skin conductance will be measured using wrist band  
35 electrodes with sampling rates at 2, 4, 8, 16 and 32 Hz during the phases 1 to 3. The SC sensor (Q-  
36 Sensor®-Affectiva®, Massachusetts Institute of Technology, USA) is set on a wristband and has a 24-  
37 hour battery life when logging. In addition, it will measure wrist movements with a build in 3-Axis  
38 accelerometer.<sup>37</sup>  
39  
40  
41  
42  
43  
44

45 *Blood flow velocity and myocardial longitudinal strain* will be measured by Speckle echocardiography  
46 (Vivid Q, GE Healthcare, USA). All 2D-dimensionnal, time-motion, Doppler and 2D-strain acquisitions  
47 and measurements will be performed according to recent guidelines.<sup>38 39</sup> Left ventricular (LV) volumes  
48 and ejection fraction (EF) will be measured using the Simpson's biplane method. LV mass (LVM) will  
49 be calculated by the Devereux formula and indexed for height (Cornell adjustment). Pulsed-Doppler LV  
50 transmitral velocities, including early (E) and atrial (A) waves, will be obtained in the apical 4-chamber  
51 view. Tissue Doppler Imaging (TDI) measures of myocardial systolic (S'), early diastolic (E') and atrial  
52 (A') velocities will be assessed at the mitral annulus level in the apical 4- and 2-chamber views. The  
53  
54  
55  
56  
57  
58  
59  
60



1  
2  
3 E/Em ratio was used as an index of LV filling pressure.<sup>40</sup> Left atrium (LA) volume was assessed on  
4 apical 4- and 2 chamber views. A graduation of LV diastolic dysfunction will be obtained according to  
5 recent guidelines.<sup>40</sup> 2D cine-loops (frame rate >70ips) of at least 5 cycles will be recorded in the short-axis  
6 views (base, mid, apex), as well as in the apical 4-, 3- and 2-chambers views. 2D-strain analysis will be  
7 performed post-processing using EchoPAC 201™ software (GE Healthcare, USA). Longitudinal and  
8 circumferential strains and strain rates (SR), as well as rotations at the apex and base, will be directly  
9 obtained from the 6 segment model. Twist mechanics will be computed from apical and basal rotational  
10 data using dedicated software (Scilab, Paris, France). For each view, the 3 cardiac cycles displaying the  
11 best image quality will be selected. Blood pressure and heart rate will be continuously monitored, and  
12 the systolic meridional wall stress, an index of afterload, will be calculated. LV end-diastolic volumes  
13 will also be obtained as preload index.

14  
15  
16  
17  
18  
19  
20  
21  
22  
23  
24  
25  
26 Endocrine assays: Blood samples will be collected by a qualified nurse after participants have fasted  
27 overnight. Blood will be collected using a venipuncture at the brachial vein. After collection, blood will  
28 be centrifuged and aliquots will be stored (-80°C) for subsequent analysis. Basic biology (e.g.  
29 triglycerides, cholesterol, LDLC, HDLC, HbA1c)<sup>35</sup> as well as all other biochemical determination (e.g.,  
30 leptin,<sup>35</sup> ghrelin,<sup>7 41</sup> BDNF,<sup>42-44</sup> IL-1β,<sup>35</sup> IL-6,<sup>35</sup> IL-1,<sup>35</sup> TNFα,<sup>35</sup> NPY,<sup>45</sup> cortisol,<sup>46 47</sup> DHEAS<sup>46 47</sup>) will  
31 be assessed in the biochemistry laboratory of Clermont-Ferrand University Hospital. All analyses will  
32 be conducted by the same technician. Polymorphism of the angiotensin converting enzyme<sup>48-51</sup> and  
33 polymorphism of the serotonin<sup>52-54</sup> will be measured by blood cells, as well as telomeres length,<sup>55</sup> that  
34 are all linked with stress.

35  
36  
37  
38  
39  
40  
41  
42  
43  
44  
45 Complementary measures: Stress, fatigue, and sleep (Visual analogue scale of 100 mm),<sup>10</sup> burn out  
46 (Maslach Burn Out Inventory),<sup>56</sup> depression and anxiety (Hospital Anxiety and Depression Scale, STAI-  
47 Y and Hamilton scale for anxiety 7 items),<sup>57-59</sup> mindfulness (Freiburg Mindfulness Inventory),<sup>22,23</sup>  
48 coping strategies (Brief COPE Questionnaire),<sup>60</sup> emotions (Emotion Regulation Questionnaire),<sup>61</sup>  
49 perception of work (Job Content Questionnaire of Karasek),<sup>62 63</sup> self-efficacy (Perceived self-efficacy  
50 scale),<sup>64</sup> alexithymia (Toronto Alexithymia Scale),<sup>65-67</sup> illness perception (Brief Illness Perception  
51 Questionnaire (B-IPQ)),<sup>68 69</sup> metacognition (MetaCognition Questionnaire),<sup>70</sup> general health (General  
52 health questionnaire 36 items),<sup>71</sup> lifestyle (smoking, alcohol...),<sup>10</sup> demographics (such as marital status,

1  
2  
3 number of children, etc), nutrition (3-day self-report questionnaire with a face-to-face validation with a  
4 dietitian)<sup>2</sup> and physical activity (Recent Physical Activity Questionnaire (RPAQ))<sup>72</sup> will be obtained by  
5 questionnaires.  
6  
7

8  
9 ***Bone parameters:*** Bone microarchitecture will be measured by Peripheral Quantitative Computed  
10 Tomography (pQCT, XCT 3000 Stratec Medizintechnik Pforzheim, Germany).<sup>73-75</sup> Bone mineral  
11 content ( $g/cm$ ), volumetric cortical and trabecular BMC ( $mg/cm^3$ ), total area ( $mm^2$ ), cortical and  
12 trabecular area ( $mm^2$ ) and density ( $g/cm^2$ ), bone strength ( $mm^3$ ), will be assessed by tomographic slices  
13 of 2 mm thickness at the distal (4%), proximal (66%) site of the non-dominant tibia and radius. Scan  
14 speed and voxel size are 20 mm/s and 0.4 mm, respectively. To assure quality of measurement,  
15 calibration checks will be performed by scanning a standard phantom with known densities, prior to  
16 each scan. Bone densitometry will be measured by Dual energy X ray Absorptiometry (DXA, QDR-  
17 4500A, Hologic, Inc., Waltham, MA). Bone mineral density (BMD,  $g/cm^2$ ), bone mineral content  
18 (BMC, g), bone area ( $cm^2$ ) will be determined for each participant. The DXA measurements will be  
19 taken for whole body, lumbar spine (L2-L4) and non-dominant hip (including the femoral neck,  
20 trochanteric and intertrochanteric regions). All DXA scans will be conducted by the same technician  
21 and quality assurance checks will be performed routinely. The in-vivo coefficient of variation (CV) is  
22 0.5%.  
23  
24  
25  
26  
27  
28  
29  
30  
31  
32  
33  
34  
35  
36  
37

38  
39 ***Observance*** with physical activity, nutrition, and psychological techniques will be retrieved. Physical  
40 activity will be assessed with the use of RPAQ at M6 and M12.<sup>72</sup> Nutrition will be assessed by using  
41 three days self-report questionnaire with a face-to-face validation with a dietitian at M6 and M12.<sup>2</sup> The  
42 use of psychological techniques will be measured by monthly self-report questionnaires (number of use  
43 per month for each technique).  
44  
45  
46  
47  
48  
49

50  
51 ***Statistical analysis:*** Statistical analysis will be performed using Stata software (version 13; Stata-Corp,  
52 College Station, Tex., USA). All statistical tests will be two-sided and  $p < 0.05$  will be considered  
53 significant. The statistics will be analyzed in intention-to-treat. After testing for normal distribution  
54 (Shapiro-Wilk test), data will be treated either by parametric or non-parametric analyses according to  
55  
56  
57  
58  
59  
60

1  
2  
3 statistical assumptions. Inter-groups comparisons will be performed 1) without adjustment and 2)  
4  
5 adjusting on possible confounder's factors.  
6

7 To highlight that the spa residential program will have long-term benefits (one year) on biomarkers of  
8  
9 stress, the comparisons will be performed using Student t-test or Mann-Whitney test if assumptions of  
10  
11 t-test are not respected (normality and homoscedasticity analyzed using Fisher-Snedecor's test). The  
12  
13 results will be expressed as effect-size and 95% confidence interval. This primary analysis will be  
14  
15 completed by multivariable analysis (linear regression with logarithmic transformation of dependent  
16  
17 outcome if necessary) considering an adjustment on covariates fixed according to univariate results,  
18  
19 clinical and epidemiological relevance (notably age, gender, baseline BMI and baseline stress levels)  
20  
21 and observance to physical activity, nutrition, and the use of psychological techniques. The results will  
22  
23 be expressed as regression coefficients and 95% confidence intervals.  
24  
25

26 Comparisons between groups will be performed similarly as presented previously for quantitative  
27  
28 outcomes. Comparisons concerning categorical variables will be performed using Chi-squared or when  
29  
30 appropriate Fischer-exact test. The results will be expressed as absolute risk differences and 95%  
31  
32 confidence intervals. Then, the multivariable analysis will be conducted using linear and generalized  
33  
34 linear models according to the statistical nature of dependent endpoint. The results will be expressed as  
35  
36 regression coefficients or relative risks, and 95% confidence intervals.  
37  
38

39 Moreover, the relations between quantitative parameters will be analyzed using correlation coefficients  
40  
41 (Pearson or Spearman according to statistical distribution). Considering the several multiple  
42  
43 comparisons, a correction of the type I error will be applied (Sidak's correction). The comparisons of  
44  
45 correlation coefficients (in different groups of subjects and within a single group of subjects) will be  
46  
47 performed using Fisher's Z transformation <sup>76</sup> and Williams' T2 statistic <sup>77</sup>. Multidimensional factorial  
48  
49 analyses will be performed to complete these statistical analyses.  
50  
51

52 Concerning the parameters collected longitudinally, mixed models will be performed to study fixed  
53  
54 effects – group, time points evaluation and their interaction – taking into account between and within  
55  
56 subject variability (as random-effect). For continuous endpoints, the normality of residuals will be  
57  
58 assessed using the Shapiro-Wilk test.  
59  
60

1  
2  
3 In addition to previous analyses, to study differences during follow-up (end of the spa program, 6 and  
4 12 months), these analyses will be completed using ANCOVA considering values at baseline.<sup>78</sup>  
5  
6  
7 Normality of residuals will be verified.  
8

9 A sensitivity analysis will be realized to study the statistical nature of missing data (at random or not)  
10 and then, to apply the most appropriate imputation data method (multiple imputation data, last  
11 observation carried out). Baseline characteristics of participants who will have a complete follow-up  
12 and those who will be lost to follow-up will be compared with statistical tests aforementioned.  
13  
14  
15  
16  
17

### 18 19 20 **Radiation exposure and harms**

21 Both DXA and pQCT provide measures of body composition and bone properties by exposing  
22 participants to low level radiation: 0.0056 mSv from DXA scans (*whole body, lumbar and hip*) and  
23 0.0014 mSv from the pQCT scans (*tibia and radius measures*)<sup>79</sup>. Over the duration of each study, the  
24 effective dose of 0.014 mSv will be administered.  
25  
26  
27  
28  
29

30 A Harms section was not considered in the protocol, but this kind of intervention was considered as very  
31 low risk by the ethics committee.  
32  
33  
34  
35  
36

### 37 **Confidentiality and blind assessments**

38 Despite the participants and care providers will not be blinded to the participants' allocation group, in  
39 order to reduce the level of bias, assessors for most outcomes will be blinded to the assignment group  
40 of each participant, such as for HRV, biological measures, or bone parameters. All outcome data will  
41 remain blinded until the end of the study. Patient's data will be deidentified and all data will be treated  
42 anonymously.  
43  
44  
45  
46  
47  
48  
49  
50

### 51 **Patient and public involvement**

52 The Thermal spa center of Vichy in collaboration with the Preventive and Occupational Medicine  
53 Department of the University Hospital of Clermont-Ferrand identified and addressed the following  
54 priorities: prevention, obesity, weight loss, stress, cardiovascular morbidity. We are grateful for the  
55 opinion of volunteers and professionals from the Vichy Spa Center on the psychological intervention.  
56  
57  
58  
59  
60

1  
2  
3 Conferences and meetings with participants will be organised in order to provide them feedback from  
4  
5 this research.  
6  
7  
8

### 9 **Ethical considerations and dissemination**

10  
11 The ObesiStress protocol complies with the Ethics guidelines for Clinical Research and has been  
12  
13 approved by the Ethic Committee (CPP Sud-Est VI, Clermont-Ferrand - ANSM: 2016-A01774-47), the  
14  
15 protocol has also been registered in Clinical Trial NCT 03578757. In accordance with Ethical  
16  
17 considerations, the chief investigator is responsible of ensuring that participants understand potential  
18  
19 risks and benefits of taking part in the study. Moreover, the chief investigator is responsible for obtaining  
20  
21 writing consent from participants. The results will be disseminated at several research conferences and  
22  
23 published articles in peer-reviewed journals.  
24  
25  
26  
27

### 28 **Discussion**

29  
30 The ObesiStress protocol was designed to provide a better understanding of the effect of a spa residential  
31  
32 program combined with a stress management program on the improvement of heart rate variability in  
33  
34 the treatment of obesity. The creation of a new thermal program would allow new innovative approaches  
35  
36 for stress management in obesity. The long-term success of lifestyle interventions such as those  
37  
38 proposed in prevention of obesity is the observance to the treatment (nutrition, physical activity,  
39  
40 psychology).<sup>80</sup> We previously demonstrated that a spa program may play a major role in sustainable  
41  
42 lifestyle changes.<sup>35</sup> Because of the stress management program and because the participants will be  
43  
44 accompanied by health-care professionals, the observance to treatment during a one-year follow-up  
45  
46 could be more efficient. In order to avoid generalizability of our expected results, we will pay a particular  
47  
48 attention at the demographics of included participants (particularly between participants recruited from  
49  
50 the “usual clients of the spa”, and other participants). Secondary and sensitivity analyses will take into  
51  
52 account provenance of participants.  
53  
54  
55  
56  
57

### 58 **Current study status**

59  
60 The status of the trial is ongoing recruitment.

## Funding

The study is integrally funded by the Auvergne Rhône-Alpes, the University Hospital of Clermont-Ferrand and by the European Regional Development Fund (FEDER, Fonds Europeen de Développement Economique et Régional). The funding source had no role in the design, conduct, or reporting of the study.

## Competing interests

The authors declare that they have no competing interests.

## Author's contributions

FD contributed to the study design. FD was responsible for ethics committee. FD and AV will coordinate the recruitment of patients. DC, EC and PD will be responsible for bone measures. AA will be responsible for liver-related factors. DP and SH will be responsible for psychosocial analysis. LM and MM will be responsible for mindfulness, psychological education and cognitive-compartmental therapy analysis. GV will be responsible for the analysis of memory-related data. PO, OI and GB will be responsible for cardiovascular measures. YB, NF and MMD will be responsible for nutritional measures and analysis. DC, EC and PD will be responsible for physical activity analysis. AV will be responsible for the collection of psychological factors. BP is responsible for the statistical analysis. EC was responsible for the clinical trial and wrote the first draft of this manuscript. All authors read, contributed towards and approved of the final manuscript.

## Acknowledgement

Nothing to declare.

## References

1. Quine L. Workplace bullying in nhs community trust: Staff questionnaire survey. *BMJ*. 1999;**318**:228-32

2. Dutheil F, Lac G, Lesourd B et al. Different modalities of exercise to reduce visceral fat mass and cardiovascular risk in metabolic syndrome: The resolve randomized trial. *Int. J. Cardiol.* 2013;**168**:3634-42
3. Sinha R, Jastreboff AM. Stress as a common risk factor for obesity and addiction. *Biol. Psychiatry.* 2013;**73**:827-35
4. Foss B, Dyrstad SM. Stress in obesity: Cause or consequence? *Med. Hypotheses.* 2011;**77**:7-10
5. Robinson E, Hunger JM, Daly M. Perceived weight status and risk of weight gain across life in us and uk adults. *Int J Obes (Lond).* 2015;**39**:1721-6
6. Haleem DJ. Investigations into the involvement of leptin in responses to stress. *Behav. Pharmacol.* 2014;**25**:384-97
7. Schellekens H, Finger BC, Dinan TG, Cryan JF. Ghrelin signalling and obesity: At the interface of stress, mood and food reward. *Pharmacol. Ther.* 2012;**135**:316-26
8. Isasi CR, Parrinello CM, Jung MM et al. Psychosocial stress is associated with obesity and diet quality in hispanic/latino adults. *Ann. Epidemiol.* 2015;**25**:84-9
9. Backe EM, Seidler A, Latza U, Rossnagel K, Schumann B. The role of psychosocial stress at work for the development of cardiovascular diseases: A systematic review. *Int. Arch. Occup. Environ. Health.* 2012;**85**:67-79
10. Dutheil F, Boudet G, Perrier C et al. Jobstress study: Comparison of heart rate variability in emergency physicians working a 24-hour shift or a 14-hour night shift - a randomized trial. *Int. J. Cardiol.* 2012;**158**:322-5
11. Karason K, Molgaard H, Wikstrand J, Sjostrom L. Heart rate variability in obesity and the effect of weight loss. *Am. J. Cardiol.* 1999;**83**:1242-7
12. Chintala KK, Krishna BH, N MR. Heart rate variability in overweight health care students: Correlation with visceral fat. *J Clin Diagn Res.* 2015;**9**:1
13. Tsuji H, Larson MG, Venditti FJ, Jr. et al. Impact of reduced heart rate variability on risk for cardiac events. The framingham heart study. *Circulation.* 1996;**94**:2850-5
14. Boudet G, Walther G, Courteix D et al. Paradoxical dissociation between heart rate and heart rate variability following different modalities of exercise in individuals with metabolic syndrome: The resolve study. *European journal of preventive cardiology.* 2017;**24**:281-96
15. Hufnagel C, Chambres P, Bertrand PR, Dutheil F. The need for objective measures of stress in autism. *Frontiers in psychology.* 2017;**8**
16. Proietti R, Mapelli D, Volpe B et al. Mental stress and ischemic heart disease: Evolving awareness of a complex association. *Future Cardiol.* 2011;**7**:425-37
17. Elenkov IJ, Iezzoni DG, Daly A, Harris AG, Chrousos GP. Cytokine dysregulation, inflammation and well-being. *Neuroimmunomodulation.* 2005;**12**:255-69
18. Dutheil F, Lesourd B, Courteix D et al. Blood lipids and adipokines concentrations during a 6-month nutritional and physical activity intervention for metabolic syndrome treatment. *Lipids Health Dis.* 2010;**9**:148
19. Bloom L, Shelton B, Bengough M, Brennan L. Psychosocial outcomes of a non-dieting based positive body image community program for overweight adults: A pilot study. *J Eat Disord.* 2013;**1**:44
20. Waysfeld B. [psychological approaches to the obese]. *Presse Med.* 2000;**29**:556-63
21. van der Klink JJ, Blonk RW, Schene AH, van Dijk FJ. The benefits of interventions for work-related stress. *American Journal of Public Health.* 2001;**91**:270-6
22. Banz WJ, Maher MA, Thompson WG et al. Effects of resistance versus aerobic training on coronary artery disease risk factors. *Exp Biol Med (Maywood).* 2003;**228**:434-40
23. Brinkborg H, Michanek J, Hesser H, Berglund G. Acceptance and commitment therapy for the treatment of stress among social workers: A randomized controlled trial. *Behaviour Research and Therapy.* 2011;**49**:389-98
24. Davies WR. Mindful meditation: Healing burnout in critical care nursing. *Holist. Nurs. Pract.* 2008;**22**:32-6

- 1
- 2
- 3 25. Cohen-Katz J, Wiley SD, Capuano T, Baker DM, Shapiro S. The effects of mindfulness-based
- 4 stress reduction on nurse stress and burnout: A quantitative and qualitative study. *Holist. Nurs.*
- 5 *Pract.* 2004;**18**:302-8
- 6 26. Stults-Kolehmainen MA, Sinha R. The effects of stress on physical activity and exercise. *Sports*
- 7 *Med.* 2014;**44**:81-121
- 8 27. Hansen AM, Blangsted AK, Hansen EA, Sogaard K, Sjogaard G. Physical activity, job demand-
- 9 control, perceived stress-energy, and salivary cortisol in white-collar workers. *Int. Arch. Occup.*
- 10 *Environ. Health.* 2010;**83**:143-53
- 11 28. Kiecolt-Glaser JK. Stress, food, and inflammation: Psychoneuroimmunology and nutrition at
- 12 the cutting edge. *Psychosomatic medicine.* 2010;**72**:365
- 13 29. Bhui KS, Dinos S, Stansfeld SA, White PD. A synthesis of the evidence for managing stress at
- 14 work: A review of the reviews reporting on anxiety, depression, and absenteeism. *J Environ*
- 15 *Public Health.* 2012;**2012**:515874
- 16 30. Elghozi JL, Girard A, Laude D. Effects of drugs on the autonomic control of short-term heart
- 17 rate variability. *Auton Neurosci.* 2001;**90**:116-21
- 18 31. Bond FW, Bunce D. The role of acceptance and job control in mental health, job satisfaction,
- 19 and work performance. *J. Appl. Psychol.* 2003;**88**:1057-67
- 20 32. Tochikubo O, Ikeda A, Miyajima E, Ishii M. Effects of insufficient sleep on blood pressure
- 21 monitored by a new multibiomedical recorder. *Hypertension.* 1996;**27**:1318-24
- 22 33. Khalfa N, Bertrand PR, Boudet G, Chamoux A, Billat V. Heart rate regulation processed through
- 23 wavelet analysis and change detection: Some case studies. *Acta Biotheor.* 2012;**60**:109-29
- 24 34. Obesity: Preventing and managing the global epidemic. Report of a who consultation. *World*
- 25 *Health Organ. Tech. Rep. Ser.* 2000;**894**:i-xii, 1-253
- 26 35. Courteix D, Valente-Dos-Santos J, Ferry B et al. Multilevel approach of a 1-year program of
- 27 dietary and exercise interventions on bone mineral content and density in metabolic syndrome
- 28 - the resolve randomized controlled trial. *PLoS One.* 2015;**10**:e0136491
- 29 36. Pateyjohns IR, Brinkworth GD, Buckley JD, Noakes M, Clifton PM. Comparison of three
- 30 bioelectrical impedance methods with dxa in overweight and obese men. *Obesity (Silver*
- 31 *Spring).* 2006;**14**:2064-70
- 32 37. Dutheil F, Chambres P, Hufnagel C et al. 'Do well b.': Design of well being monitoring systems.
- 33 A study protocol for the application in autism. *BMJ Open.* 2015;**5**:e007716
- 34 38. Lang RM, Badano LP, Mor-Avi V et al. Recommendations for cardiac chamber quantification by
- 35 echocardiography in adults: An update from the american society of echocardiography and
- 36 the european association of cardiovascular imaging. *Journal of the American Society of*
- 37 *Echocardiography.* 2015;**28**:1-39. e14
- 38 39. Mor-Avi V, Lang RM, Badano LP et al. Current and evolving echocardiographic techniques for
- 39 the quantitative evaluation of cardiac mechanics: Ase/ae consensus statement on
- 40 methodology and indications: Endorsed by the japanese society of echocardiography. *Journal*
- 41 *of the American Society of Echocardiography.* 2011;**24**:277-313
- 42 40. Nagueh SF, Smiseth OA, Appleton CP et al. Recommendations for the evaluation of left
- 43 ventricular diastolic function by echocardiography: An update from the american society of
- 44 echocardiography and the european association of cardiovascular imaging. *European heart*
- 45 *journal cardiovascular Imaging.* 2016;**17**:1321-60
- 46 41. Buss J, Havel PJ, Epel E et al. Associations of ghrelin with eating behaviors, stress, metabolic
- 47 factors, and telomere length among overweight and obese women: Preliminary evidence of
- 48 attenuated ghrelin effects in obesity? *Appetite.* 2014;**76**:84-94
- 49 42. Karege F, Perret G, Bondolfi G et al. Decreased serum brain-derived neurotrophic factor levels
- 50 in major depressed patients. *Psychiatry Res.* 2002;**109**:143-8
- 51 43. Karege F, Bondolfi G, Gervasoni N et al. Low brain-derived neurotrophic factor (bdnf) levels in
- 52 serum of depressed patients probably results from lowered platelet bdnf release unrelated to
- 53 platelet reactivity. *Biol Psychiatry.* 2005;**57**:1068-72
- 54
- 55
- 56
- 57
- 58
- 59
- 60



- 1
- 2
- 3
- 4 44. Shimizu E, Hashimoto K, Okamura N et al. Alterations of serum levels of brain-derived neurotrophic factor (bDNF) in depressed patients with or without antidepressants. *Biol Psychiatry*. 2003;**54**:70-5
- 5
- 6 45. Krystal JH, Neumeister A. Noradrenergic and serotonergic mechanisms in the neurobiology of posttraumatic stress disorder and resilience. *Brain Res*. 2009;**1293**:13-23
- 7
- 8 46. Lac G, Dutheil F, Brousse G, Triboulet-Kelly C, Chamoux A. Saliva dHEAs changes in patients suffering from psychopathological disorders arising from bullying at work. *Brain Cogn*. 2012;**80**:277-81
- 9
- 10
- 11
- 12 47. Danhof-Pont MB, van Veen T, Zitman FG. Biomarkers in burnout: A systematic review. *J Psychosom Res*. 2011;**70**:505-24
- 13
- 14 48. Montgomery H, Clarkson P, Barnard M et al. Angiotensin-converting-enzyme gene insertion/deletion polymorphism and response to physical training. *Lancet*. 1999;**353**:541-5
- 15
- 16 49. Henrion D, Benessiano J, Philip I et al. The deletion genotype of the angiotensin i-converting enzyme is associated with an increased vascular reactivity in vivo and in vitro. *J Am Coll Cardiol*. 1999;**34**:830-6
- 17
- 18
- 19
- 20 50. Gard PR. The role of angiotensin ii in cognition and behaviour. *Eur J Pharmacol*. 2002;**438**:1-14
- 21 51. Thayer JF, Merritt MM, Sollers JJ, 3rd et al. Effect of angiotensin-converting enzyme insertion/deletion polymorphism dd genotype on high-frequency heart rate variability in african americans. *Am. J. Cardiol*. 2003;**92**:1487-90
- 22
- 23 52. Hariri AR, Drabant EM, Weinberger DR. Imaging genetics: Perspectives from studies of genetically driven variation in serotonin function and corticolimbic affective processing. *Biol. Psychiatry*. 2006;**59**:888-97
- 24
- 25 53. Hariri AR, Weinberger DR. Functional neuroimaging of genetic variation in serotonergic neurotransmission. *Genes Brain Behav*. 2003;**2**:341-9
- 26
- 27 54. McCaffery JM, Bleil M, Pogue-Geile MF, Ferrell RE, Manuck SB. Allelic variation in the serotonin transporter gene-linked polymorphic region (5-HTTLPR) and cardiovascular reactivity in young adult male and female twins of european-american descent. *Psychosom. Med*. 2003;**65**:721-8
- 28
- 29 55. Epel ES, Blackburn EH, Lin J et al. Accelerated telomere shortening in response to life stress. *Proc Natl Acad Sci U S A*. 2004;**101**:17312-5
- 30
- 31 56. Choron G, Dutheil F, Lesage FX. Are nurses burned out? *Int. J. Nurs. Stud*. 2016;**58**:80-1
- 32
- 33 57. Hung CI, Liu CY, Wang SJ, Yao YC, Yang CH. The cut-off points of the depression and somatic symptoms scale and the hospital anxiety and depression scale in detecting non-full remission and a current major depressive episode. *Int J Psychiatry Clin Pract*. 2012;**16**:33-40
- 34
- 35 58. Julian LJ. Measures of anxiety: State-trait anxiety inventory (STAI), Beck anxiety inventory (BAI), and hospital anxiety and depression scale-anxiety (HADS-A). *Arthritis Care Res (Hoboken)*. 2011;**63 Suppl 11**:S467-72
- 36
- 37 59. Spiess K, Sachs G, Moser G et al. Psychological moderator variables and metabolic control in recent onset type 1 diabetic patients--a two year longitudinal study. *J. Psychosom. Res*. 1994;**38**:249-58
- 38
- 39 60. Endler NS, Parker JD. Multidimensional assessment of coping: A critical evaluation. *J. Pers. Soc. Psychol*. 1990;**58**:844-54
- 40
- 41 61. Ioannidis CA, Siegling AB. Criterion and incremental validity of the emotion regulation questionnaire. *Frontiers in psychology*. 2015;**6**:247
- 42
- 43 62. Lesage FX, Choron G, Dutheil F. Multifaceted program to reduce job strain in ICU nurses. *JAMA*. 2019;**321**:1410-1
- 44
- 45 63. Trousselard M, Dutheil F, Naughton G et al. Stress among nurses working in emergency, anesthesiology and intensive care units depends on qualification: A job demand-control survey. *Int. Arch. Occup. Environ. Health*. 2016;**89**:221-9
- 46
- 47 64. Luszczynska A, Scholz U, Schwarzer R. The general self-efficacy scale: Multicultural validation studies. *J. Psychol*. 2005;**139**:439-57
- 48
- 49 65. Li S, Zhang B, Guo Y, Zhang J. The association between alexithymia as assessed by the 20-item Toronto Alexithymia Scale and depression: A meta-analysis. *Psychiatry Res*. 2015;**227**:1-9
- 50
- 51
- 52
- 53
- 54
- 55
- 56
- 57
- 58
- 59
- 60

- 1
  - 2
  - 3
  - 4
  - 5
  - 6
  - 7
  - 8
  - 9
  - 10
  - 11
  - 12
  - 13
  - 14
  - 15
  - 16
  - 17
  - 18
  - 19
  - 20
  - 21
  - 22
  - 23
  - 24
  - 25
  - 26
  - 27
  - 28
  - 29
  - 30
  - 31
  - 32
  - 33
  - 34
  - 35
  - 36
  - 37
  - 38
  - 39
  - 40
  - 41
  - 42
  - 43
  - 44
  - 45
  - 46
  - 47
  - 48
  - 49
  - 50
  - 51
  - 52
  - 53
  - 54
  - 55
  - 56
  - 57
  - 58
  - 59
  - 60
66. Bagby RM, Parker JD, Taylor GJ. The twenty-item toronto alexithymia scale--i. Item selection and cross-validation of the factor structure. *J. Psychosom. Res.* 1994;**38**:23-32
67. Bagby RM, Taylor GJ, Parker JD. The twenty-item toronto alexithymia scale--ii. Convergent, discriminant, and concurrent validity. *J. Psychosom. Res.* 1994;**38**:33-40
68. Broadbent E, Petrie KJ, Main J, Weinman J. The brief illness perception questionnaire. *J. Psychosom. Res.* 2006;**60**:631-7
69. Broadbent E, Wilkes C, Koschwanez H et al. A systematic review and meta-analysis of the brief illness perception questionnaire. *Psychology & health.* 2015;**30**:1361-85
70. Wells A, Cartwright-Hatton S. A short form of the metacognitions questionnaire: Properties of the mcq-30. *Behav. Res. Ther.* 2004;**42**:385-96
71. Amiel R, Lebigre F. [a new rapid test for the evaluation of mental health. Its use for early detections. Its importance in health surveys]. *Ann Med Psychol (Paris).* 1970;**1**:565-80
72. Golubic R, May AM, Benjaminsen Borch K et al. Validity of electronically administered recent physical activity questionnaire (rpaq) in ten european countries. *PLoS One.* 2014;**9**:e92829
73. Sornay-Rendu E, Boutroy S, Munoz F, Bouxsein ML. Cortical and trabecular architecture are altered in postmenopausal women with fractures. *Osteoporos. Int.* 2009;**20**:1291-7
74. Boutroy S, Bouxsein ML, Munoz F, Delmas PD. In vivo assessment of trabecular bone microarchitecture by high-resolution peripheral quantitative computed tomography. *J. Clin. Endocrinol. Metab.* 2005;**90**:6508-15
75. Stein EM, Liu XS, Nickolas TL et al. Abnormal microarchitecture and reduced stiffness at the radius and tibia in postmenopausal women with fractures. *J. Bone Miner. Res.* 2010;**25**:2572-81
76. Kullback S. *Information theory and statistics.* New York: John Wiley & Sons; 1959.
77. Steiger JH. Tests for comparing elements of a correlation matrix. *Psychol. Bull.* 1980;**87**:245-51
78. Vickers AJ, Altman DG. Statistics notes: Analysing controlled trials with baseline and follow up measurements. *BMJ.* 2001;**323**:1123-4
79. Damilakis J, Adams JE, Guglielmi G, Link TM. Radiation exposure in x-ray-based imaging techniques used in osteoporosis. *Eur Radiol.* 2010;**20**:2707-14
80. Fappa E, Yannakoulia M, Pitsavos C et al. Lifestyle intervention in the management of metabolic syndrome: Could we improve adherence issues? *Nutrition.* 2008;**24**:286-91
81. Elefteriou F, Ahn JD, Takeda S et al. Leptin regulation of bone resorption by the sympathetic nervous system and cart. *Nature.* 2005;**434**:514-20
82. Puissant C, Abraham P, Durand S et al. Reproducibility of non-invasive assessment of skin endothelial function using laser doppler flowmetry and laser speckle contrast imaging. *PLoS One.* 2013;**8**:e61320
83. Souza EG, De Lorenzo A, Huguenin G, Oliveira GM, Tibirica E. Impairment of systemic microvascular endothelial and smooth muscle function in individuals with early-onset coronary artery disease: Studies with laser speckle contrast imaging. *Coron. Artery Dis.* 2014;**25**:23-8
84. Wu C, Gluer C, Lu Y et al. Ultrasound characterization of bone demineralization. *Calcif. Tissue Int.* 1998;**62**:133-9
85. Bussing A, Fischer J, Haller A et al. Validation of the brief multidimensional life satisfaction scale in patients with chronic diseases. *Eur J Med Res.* 2009;**14**:171-7
86. Bussing A, Edelhauser F, Weisskircher A, Fouladbakhsh JM, Heusser P. Inner correspondence and peacefulness with practices among participants in eurythmy therapy and yoga: A validation study. *Evid Based Complement Alternat Med.* 2011;**2011**

**Table 1.** Outcomes

| Variables                                    | Type of Measures                                                                          | Modalities to measure                                                | References            |
|----------------------------------------------|-------------------------------------------------------------------------------------------|----------------------------------------------------------------------|-----------------------|
| Biomarkers of stress and cardiovascular risk | Heart rate variability                                                                    | Holter                                                               | 81                    |
|                                              | Skin conductance                                                                          | Wristband electrodes – Movisens                                      | 37                    |
|                                              | Blood flow velocity                                                                       | Laser speckle contrast imaging (LSCI)                                | 82-83                 |
|                                              | Myocardial longitudinal strain                                                            | Speckle tracking echocardiography (STE)                              | 38-39                 |
| Genetic polymorphisms                        | Polymorphism of the angiotensin converting enzyme                                         | Blood cells                                                          | 48-51                 |
|                                              | Polymorphism of the serotonin                                                             | Blood cells                                                          | 52-54                 |
| Demographics* (* Adjustment variables)       | Age, gender, qualification, personal work status, ethnicity, life and occupational events | Questionnaire                                                        | 10                    |
| Clinical measurements                        |                                                                                           | Height, weight, blood pressure, heart rate, Waist circumference      |                       |
| Body composition                             | Muscle mass, fat mass, bone structure                                                     | Impedancemeter                                                       | 36                    |
|                                              |                                                                                           | Densitometry X-ray absorption                                        | 35                    |
|                                              |                                                                                           | Peripheral quantitative computed tomography (pQCT)                   | 73-75                 |
|                                              |                                                                                           | Quantitative ultrasounds (QUS)                                       | 84                    |
| Psychology and quality of life               | Depression                                                                                | HAD 7 items                                                          | 57                    |
|                                              | Anxiety                                                                                   | HAD 7 items                                                          | 57                    |
|                                              |                                                                                           | Hamilton scale for anxiety 7 items                                   |                       |
|                                              |                                                                                           | State and Trait Anxiety Inventory (STAI)                             | 58-59                 |
|                                              | General health                                                                            | General health questionnaire SF-36 36 items                          | 71                    |
|                                              | Quality of life                                                                           | Brief Multidimensional Life Satisfaction Scale 11 items              | 85                    |
|                                              | Stress, fatigue, sleep                                                                    | Visual analog scale of 100 mm                                        | 10                    |
|                                              | Burn-out                                                                                  | Maslach Burn-Out Inventory                                           | 56                    |
|                                              | Mindfulness                                                                               | Mindfulness Fribourg Mindfulness Inventory                           | <a href="#">22,23</a> |
|                                              | Coping                                                                                    | Brief COPE questionnaire (BCQ)                                       | 60                    |
|                                              | Emotions                                                                                  | Emotion Regulation Questionnaire (ERQ)                               | 61                    |
|                                              | Perception of work                                                                        | Job Content Questionnaire of Karasek                                 | 63                    |
|                                              | Self-efficacy                                                                             | Perceived self-efficacy scale                                        | 64                    |
|                                              | Alexithymia                                                                               | Toronto Alexithymia Scale (TAS-20)                                   | 65-67                 |
| Illness Perception                           | Brief Illness Perception Questionnaire (B-IPQ)                                            | 68-69                                                                |                       |
| Metacognition                                | MetaCognition Questionnaire (MCQ-30)                                                      | 70                                                                   |                       |
| Personal resources                           | Trait perception of workplace stress                                                      | Inner Correspondence/Peaceful Harmony with practices (ICPH) 17 items | 86                    |
| Lifestyle                                    | Smoking, alcohol, coffee, food intake...                                                  | Questionnaires                                                       | 10                    |
|                                              | Physical activity                                                                         | Recent Physical Activity Questionnaire (RPAQ)                        | 72                    |
| Alloplastic load                             | HbA1c, HDLc and LDL-cholesterol, TG                                                       | EDTA tube                                                            | 35                    |

|  |                                                                     |                                             |       |
|--|---------------------------------------------------------------------|---------------------------------------------|-------|
|  | Cortisol                                                            | Dry tube, serum isolation and deep-freezing | 46 47 |
|  | DHEAS                                                               | Dry tube, serum isolation and deep-freezing | 46 47 |
|  | Leptin                                                              | Dry tube, serum isolation and deep-freezing | 35    |
|  | Ghrelin                                                             | Dry tube, serum isolation and deep-freezing | 7 41  |
|  | BDNF                                                                | Dry tube, serum isolation and deep-freezing | 42-44 |
|  | Pro-inflammatory Cytokines: IL-1 $\beta$ , IL-6, IL-1, TNF $\alpha$ | Dry tube, serum isolation and deep-freezing | 35    |
|  | NPY                                                                 | Dry tube, serum isolation and deep-freezing | 45    |
|  | Telomeres length                                                    | Blood; analyses by southern blot or PCR     | 55    |

1  
2  
3 **Figure Title:** ObestiStress protocol  
4

5 **Figure Abbreviation:** M months, D days  
6  
7  
8  
9  
10  
11  
12  
13  
14  
15  
16  
17  
18  
19  
20  
21  
22  
23  
24  
25  
26  
27  
28  
29  
30  
31  
32  
33  
34  
35  
36  
37  
38  
39  
40  
41  
42  
43  
44  
45  
46  
47  
48  
49  
50  
51  
52  
53  
54  
55  
56  
57  
58  
59  
60

For peer review only

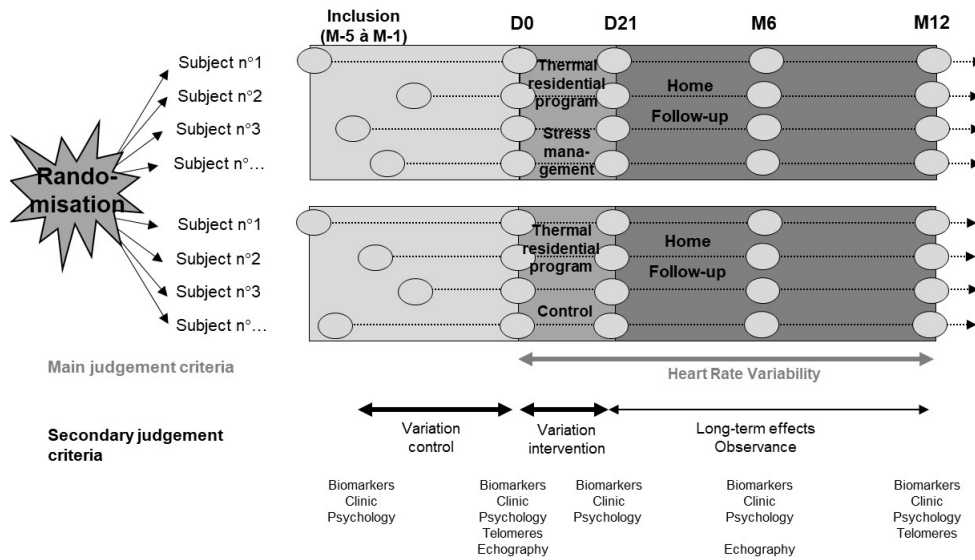

Title: The ObesiStress protocol  
M months, D day

105x59mm (300 x 300 DPI)

# Reporting checklist for protocol of a clinical trial.

Based on the SPIRIT guidelines.

## Instructions to authors

Complete this checklist by entering the page numbers from your manuscript where readers will find each of the items listed below.

Your article may not currently address all the items on the checklist. Please modify your text to include the missing information. If you are certain that an item does not apply, please write "n/a" and provide a short explanation.

Upload your completed checklist as an extra file when you submit to a journal.

In your methods section, say that you used the SPIRIT reporting guidelines, and cite them as:

Chan A-W, Tetzlaff JM, Altman DG, Laupacis A, Gøtzsche PC, Krleža-Jerić K, Hróbjartsson A, Mann H, Dickersin K, Berlin J, Doré C, Parulekar W, Summerskill W, Groves T, Schulz K, Sox H, Rockhold FW, Rennie D, Moher D. SPIRIT 2013 Statement: Defining standard protocol items for clinical trials. *Ann Intern Med.* 2013;158(3):200-207

|                                             |                     | Reporting Item                                                                                               | Page Number  |
|---------------------------------------------|---------------------|--------------------------------------------------------------------------------------------------------------|--------------|
| Title                                       | <a href="#">#1</a>  | Descriptive title identifying the study design, population, interventions, and, if applicable, trial acronym | Page 1       |
| Trial registration                          | <a href="#">#2a</a> | Trial identifier and registry name. If not yet registered, name of intended registry                         | Page 3       |
| Trial registration: data set                | <a href="#">#2b</a> | All items from the World Health Organization Trial Registration Data Set                                     |              |
| Protocol version                            | <a href="#">#3</a>  | Date and version identifier                                                                                  | Page 2       |
| Funding                                     | <a href="#">#4</a>  | Sources and types of financial, material, and other support                                                  | Page 14      |
| Roles and responsibilities: contributorship | <a href="#">#5a</a> | Names, affiliations, and roles of protocol contributors                                                      | Pages 1-2;14 |
| Roles and responsibilities:                 | <a href="#">#5b</a> | Name and contact information for the trial sponsor                                                           | Page 2       |

|    |                      |                      |                                                                   |          |
|----|----------------------|----------------------|-------------------------------------------------------------------|----------|
| 1  | sponsor contact      |                      |                                                                   |          |
| 2  | information          |                      |                                                                   |          |
| 3  |                      |                      |                                                                   |          |
| 4  | Roles and            | <a href="#">#5c</a>  | Role of study sponsor and funders, if any, in study design;       | Page 14  |
| 5  | responsibilities:    |                      | collection, management, analysis, and interpretation of           |          |
| 6  | sponsor and funder   |                      | data; writing of the report; and the decision to submit the       |          |
| 7  |                      |                      | report for publication, including whether they will have          |          |
| 8  |                      |                      | ultimate authority over any of these activities                   |          |
| 9  |                      |                      |                                                                   |          |
| 10 |                      |                      |                                                                   |          |
| 11 |                      |                      |                                                                   |          |
| 12 | Roles and            | <a href="#">#5d</a>  | Composition, roles, and responsibilities of the coordinating      |          |
| 13 | responsibilities:    |                      | centre, steering committee, endpoint adjudication                 |          |
| 14 | committees           |                      | committee, data management team, and other individuals            |          |
| 15 |                      |                      | or groups overseeing the trial, if applicable (see Item 21a       |          |
| 16 |                      |                      | for data monitoring committee)                                    |          |
| 17 |                      |                      |                                                                   |          |
| 18 |                      |                      |                                                                   |          |
| 19 |                      |                      |                                                                   |          |
| 20 | Background and       | <a href="#">#6a</a>  | Description of research question and justification for            | Page 5   |
| 21 | rationale            |                      | undertaking the trial, including summary of relevant studies      |          |
| 22 |                      |                      | (published and unpublished) examining benefits and harms          |          |
| 23 |                      |                      | for each intervention                                             |          |
| 24 |                      |                      |                                                                   |          |
| 25 |                      |                      |                                                                   |          |
| 26 |                      |                      |                                                                   |          |
| 27 | Background and       | <a href="#">#6b</a>  | Explanation for choice of comparators                             |          |
| 28 | rationale: choice of |                      |                                                                   |          |
| 29 | comparators          |                      |                                                                   |          |
| 30 |                      |                      |                                                                   |          |
| 31 |                      |                      |                                                                   |          |
| 32 | Objectives           | <a href="#">#7</a>   | Specific objectives or hypotheses                                 | Page 5   |
| 33 |                      |                      |                                                                   |          |
| 34 |                      |                      |                                                                   |          |
| 35 | Trial design         | <a href="#">#8</a>   | Description of trial design including type of trial (eg, parallel | Page 6   |
| 36 |                      |                      | group, crossover, factorial, single group), allocation ratio,     |          |
| 37 |                      |                      | and framework (eg, superiority, equivalence, non-                 |          |
| 38 |                      |                      | inferiority, exploratory)                                         |          |
| 39 |                      |                      |                                                                   |          |
| 40 |                      |                      |                                                                   |          |
| 41 |                      |                      |                                                                   |          |
| 42 | Study setting        | <a href="#">#9</a>   | Description of study settings (eg, community clinic,              |          |
| 43 |                      |                      | academic hospital) and list of countries where data will be       |          |
| 44 |                      |                      | collected. Reference to where list of study sites can be          |          |
| 45 |                      |                      | obtained                                                          |          |
| 46 |                      |                      |                                                                   |          |
| 47 |                      |                      |                                                                   |          |
| 48 | Eligibility criteria | <a href="#">#10</a>  | Inclusion and exclusion criteria for participants. If             | Page 6   |
| 49 |                      |                      | applicable, eligibility criteria for study centres and            |          |
| 50 |                      |                      | individuals who will perform the interventions (eg,               |          |
| 51 |                      |                      | surgeons, psychotherapists)                                       |          |
| 52 |                      |                      |                                                                   |          |
| 53 |                      |                      |                                                                   |          |
| 54 |                      |                      |                                                                   |          |
| 55 | Interventions:       | <a href="#">#11a</a> | Interventions for each group with sufficient detail to allow      | Pages 7- |
| 56 | description          |                      | replication, including how and when they will be                  | 8        |
| 57 |                      |                      | administered                                                      |          |
| 58 |                      |                      |                                                                   |          |
| 59 |                      |                      |                                                                   |          |
| 60 |                      |                      |                                                                   |          |



|    |                      |                      |                                                             |           |
|----|----------------------|----------------------|-------------------------------------------------------------|-----------|
| 1  | Interventions:       | <a href="#">#11b</a> | Criteria for discontinuing or modifying allocated           |           |
| 2  | modifications        |                      | interventions for a given trial participant (eg, drug dose  |           |
| 3  |                      |                      | change in response to harms, participant request, or        |           |
| 4  |                      |                      | improving / worsening disease)                              |           |
| 5  |                      |                      |                                                             |           |
| 6  |                      |                      |                                                             |           |
| 7  | Interventions:       | <a href="#">#11c</a> | Strategies to improve adherence to intervention protocols,  |           |
| 8  | adherence            |                      | and any procedures for monitoring adherence (eg, drug       |           |
| 9  |                      |                      | tablet return; laboratory tests)                            |           |
| 10 |                      |                      |                                                             |           |
| 11 |                      |                      |                                                             |           |
| 12 |                      |                      |                                                             |           |
| 13 | Interventions:       | <a href="#">#11d</a> | Relevant concomitant care and interventions that are        |           |
| 14 | concomitant care     |                      | permitted or prohibited during the trial                    |           |
| 15 |                      |                      |                                                             |           |
| 16 |                      |                      |                                                             |           |
| 17 | Outcomes             | <a href="#">#12</a>  | Primary, secondary, and other outcomes, including the       | Pages 8-  |
| 18 |                      |                      | specific measurement variable (eg, systolic blood           | 11        |
| 19 |                      |                      | pressure), analysis metric (eg, change from baseline, final |           |
| 20 |                      |                      | value, time to event), method of aggregation (eg, median,   |           |
| 21 |                      |                      | proportion), and time point for each outcome. Explanation   |           |
| 22 |                      |                      | of the clinical relevance of chosen efficacy and harm       |           |
| 23 |                      |                      | outcomes is strongly recommended                            |           |
| 24 |                      |                      |                                                             |           |
| 25 |                      |                      |                                                             |           |
| 26 |                      |                      |                                                             |           |
| 27 |                      |                      |                                                             |           |
| 28 | Participant timeline | <a href="#">#13</a>  | Time schedule of enrolment, interventions (including any    | Pages 6,  |
| 29 |                      |                      | run-ins and washouts), assessments, and visits for          | 8, Figure |
| 30 |                      |                      | participants. A schematic diagram is highly recommended     | 1         |
| 31 |                      |                      | (see Figure)                                                |           |
| 32 |                      |                      |                                                             |           |
| 33 |                      |                      |                                                             |           |
| 34 |                      |                      |                                                             |           |
| 35 | Sample size          | <a href="#">#14</a>  | Estimated number of participants needed to achieve study    | Pages 6-  |
| 36 |                      |                      | objectives and how it was determined, including clinical    | 7         |
| 37 |                      |                      | and statistical assumptions supporting any sample size      |           |
| 38 |                      |                      | calculations                                                |           |
| 39 |                      |                      |                                                             |           |
| 40 |                      |                      |                                                             |           |
| 41 |                      |                      |                                                             |           |
| 42 | Recruitment          | <a href="#">#15</a>  | Strategies for achieving adequate participant enrolment to  | Page 7    |
| 43 |                      |                      | reach target sample size                                    |           |
| 44 |                      |                      |                                                             |           |
| 45 |                      |                      |                                                             |           |
| 46 | Allocation: sequence | <a href="#">#16a</a> | Method of generating the allocation sequence (eg,           | Page 6    |
| 47 | generation           |                      | computer-generated random numbers), and list of any         |           |
| 48 |                      |                      | factors for stratification. To reduce predictability of a   |           |
| 49 |                      |                      | random sequence, details of any planned restriction (eg,    |           |
| 50 |                      |                      | blocking) should be provided in a separate document that    |           |
| 51 |                      |                      | is unavailable to those who enrol participants or assign    |           |
| 52 |                      |                      | interventions                                               |           |
| 53 |                      |                      |                                                             |           |
| 54 |                      |                      |                                                             |           |
| 55 |                      |                      |                                                             |           |
| 56 |                      |                      |                                                             |           |
| 57 | Allocation           | <a href="#">#16b</a> | Mechanism of implementing the allocation sequence (eg,      |           |
| 58 | concealment          |                      | central telephone; sequentially numbered, opaque, sealed    |           |
| 59 |                      |                      |                                                             |           |
| 60 |                      |                      |                                                             |           |

|    |                        |                      |                                                                                                                                                                                                                                                                                                                                                                                                              |          |
|----|------------------------|----------------------|--------------------------------------------------------------------------------------------------------------------------------------------------------------------------------------------------------------------------------------------------------------------------------------------------------------------------------------------------------------------------------------------------------------|----------|
| 1  | mechanism              |                      | envelopes), describing any steps to conceal the sequence until interventions are assigned                                                                                                                                                                                                                                                                                                                    |          |
| 2  |                        |                      |                                                                                                                                                                                                                                                                                                                                                                                                              |          |
| 3  |                        |                      |                                                                                                                                                                                                                                                                                                                                                                                                              |          |
| 4  | Allocation:            | <a href="#">#16c</a> | Who will generate the allocation sequence, who will enrol participants, and who will assign participants to interventions                                                                                                                                                                                                                                                                                    |          |
| 5  | implementation         |                      |                                                                                                                                                                                                                                                                                                                                                                                                              |          |
| 6  |                        |                      |                                                                                                                                                                                                                                                                                                                                                                                                              |          |
| 7  |                        |                      |                                                                                                                                                                                                                                                                                                                                                                                                              |          |
| 8  |                        |                      |                                                                                                                                                                                                                                                                                                                                                                                                              |          |
| 9  | Blinding (masking)     | <a href="#">#17a</a> | Who will be blinded after assignment to interventions (eg, trial participants, care providers, outcome assessors, data analysts), and how                                                                                                                                                                                                                                                                    |          |
| 10 |                        |                      |                                                                                                                                                                                                                                                                                                                                                                                                              |          |
| 11 |                        |                      |                                                                                                                                                                                                                                                                                                                                                                                                              |          |
| 12 |                        |                      |                                                                                                                                                                                                                                                                                                                                                                                                              |          |
| 13 |                        |                      |                                                                                                                                                                                                                                                                                                                                                                                                              |          |
| 14 | Blinding (masking):    | <a href="#">#17b</a> | If blinded, circumstances under which unblinding is permissible, and procedure for revealing a participant's allocated intervention during the trial                                                                                                                                                                                                                                                         |          |
| 15 | emergency              |                      |                                                                                                                                                                                                                                                                                                                                                                                                              |          |
| 16 | unblinding             |                      |                                                                                                                                                                                                                                                                                                                                                                                                              |          |
| 17 |                        |                      |                                                                                                                                                                                                                                                                                                                                                                                                              |          |
| 18 |                        |                      |                                                                                                                                                                                                                                                                                                                                                                                                              |          |
| 19 |                        |                      |                                                                                                                                                                                                                                                                                                                                                                                                              |          |
| 20 | Data collection plan   | <a href="#">#18a</a> | Plans for assessment and collection of outcome, baseline, and other trial data, including any related processes to promote data quality (eg, duplicate measurements, training of assessors) and a description of study instruments (eg, questionnaires, laboratory tests) along with their reliability and validity, if known. Reference to where data collection forms can be found, if not in the protocol | Pages 8- |
| 21 |                        |                      |                                                                                                                                                                                                                                                                                                                                                                                                              | 11       |
| 22 |                        |                      |                                                                                                                                                                                                                                                                                                                                                                                                              |          |
| 23 |                        |                      |                                                                                                                                                                                                                                                                                                                                                                                                              |          |
| 24 |                        |                      |                                                                                                                                                                                                                                                                                                                                                                                                              |          |
| 25 |                        |                      |                                                                                                                                                                                                                                                                                                                                                                                                              |          |
| 26 |                        |                      |                                                                                                                                                                                                                                                                                                                                                                                                              |          |
| 27 |                        |                      |                                                                                                                                                                                                                                                                                                                                                                                                              |          |
| 28 |                        |                      |                                                                                                                                                                                                                                                                                                                                                                                                              |          |
| 29 |                        |                      |                                                                                                                                                                                                                                                                                                                                                                                                              |          |
| 30 |                        |                      |                                                                                                                                                                                                                                                                                                                                                                                                              |          |
| 31 | Data collection plan:  | <a href="#">#18b</a> | Plans to promote participant retention and complete follow-up, including list of any outcome data to be collected for participants who discontinue or deviate from intervention protocols                                                                                                                                                                                                                    |          |
| 32 | retention              |                      |                                                                                                                                                                                                                                                                                                                                                                                                              |          |
| 33 |                        |                      |                                                                                                                                                                                                                                                                                                                                                                                                              |          |
| 34 |                        |                      |                                                                                                                                                                                                                                                                                                                                                                                                              |          |
| 35 |                        |                      |                                                                                                                                                                                                                                                                                                                                                                                                              |          |
| 36 |                        |                      |                                                                                                                                                                                                                                                                                                                                                                                                              |          |
| 37 |                        |                      |                                                                                                                                                                                                                                                                                                                                                                                                              |          |
| 38 | Data management        | <a href="#">#19</a>  | Plans for data entry, coding, security, and storage, including any related processes to promote data quality (eg, double data entry; range checks for data values). Reference to where details of data management procedures can be found, if not in the protocol                                                                                                                                            |          |
| 39 |                        |                      |                                                                                                                                                                                                                                                                                                                                                                                                              |          |
| 40 |                        |                      |                                                                                                                                                                                                                                                                                                                                                                                                              |          |
| 41 |                        |                      |                                                                                                                                                                                                                                                                                                                                                                                                              |          |
| 42 |                        |                      |                                                                                                                                                                                                                                                                                                                                                                                                              |          |
| 43 |                        |                      |                                                                                                                                                                                                                                                                                                                                                                                                              |          |
| 44 |                        |                      |                                                                                                                                                                                                                                                                                                                                                                                                              |          |
| 45 |                        |                      |                                                                                                                                                                                                                                                                                                                                                                                                              |          |
| 46 | Statistics: outcomes   | <a href="#">#20a</a> | Statistical methods for analysing primary and secondary outcomes. Reference to where other details of the statistical analysis plan can be found, if not in the protocol                                                                                                                                                                                                                                     | Pages    |
| 47 |                        |                      |                                                                                                                                                                                                                                                                                                                                                                                                              | 11-12    |
| 48 |                        |                      |                                                                                                                                                                                                                                                                                                                                                                                                              |          |
| 49 |                        |                      |                                                                                                                                                                                                                                                                                                                                                                                                              |          |
| 50 |                        |                      |                                                                                                                                                                                                                                                                                                                                                                                                              |          |
| 51 | Statistics: additional | <a href="#">#20b</a> | Methods for any additional analyses (eg, subgroup and adjusted analyses)                                                                                                                                                                                                                                                                                                                                     | Pages    |
| 52 | analyses               |                      |                                                                                                                                                                                                                                                                                                                                                                                                              | 11-12    |
| 53 |                        |                      |                                                                                                                                                                                                                                                                                                                                                                                                              |          |
| 54 |                        |                      |                                                                                                                                                                                                                                                                                                                                                                                                              |          |
| 55 | Statistics: analysis   | <a href="#">#20c</a> | Definition of analysis population relating to protocol non-adherence (eg, as randomised analysis), and any statistical methods to handle missing data (eg, multiple                                                                                                                                                                                                                                          | Pages    |
| 56 | population and         |                      |                                                                                                                                                                                                                                                                                                                                                                                                              | 11-12    |
| 57 | missing data           |                      |                                                                                                                                                                                                                                                                                                                                                                                                              |          |
| 58 |                        |                      |                                                                                                                                                                                                                                                                                                                                                                                                              |          |
| 59 |                        |                      |                                                                                                                                                                                                                                                                                                                                                                                                              |          |

imputation)

|    |                    |                      |                                                                 |
|----|--------------------|----------------------|-----------------------------------------------------------------|
| 1  |                    |                      |                                                                 |
| 2  |                    |                      |                                                                 |
| 3  | Data monitoring:   | <a href="#">#21a</a> | Composition of data monitoring committee (DMC);                 |
| 4  | formal committee   |                      | summary of its role and reporting structure; statement of       |
| 5  |                    |                      | whether it is independent from the sponsor and competing        |
| 6  |                    |                      | interests; and reference to where further details about its     |
| 7  |                    |                      | charter can be found, if not in the protocol. Alternatively, an |
| 8  |                    |                      | explanation of why a DMC is not needed                          |
| 9  |                    |                      |                                                                 |
| 10 |                    |                      |                                                                 |
| 11 |                    |                      |                                                                 |
| 12 | Data monitoring:   | <a href="#">#21b</a> | Description of any interim analyses and stopping                |
| 13 | interim analysis   |                      | guidelines, including who will have access to these interim     |
| 14 |                    |                      | results and make the final decision to terminate the trial      |
| 15 |                    |                      |                                                                 |
| 16 |                    |                      |                                                                 |
| 17 | Harms              | <a href="#">#22</a>  | Plans for collecting, assessing, reporting, and managing        |
| 18 |                    |                      | solicited and spontaneously reported adverse events and         |
| 19 |                    |                      | other unintended effects of trial interventions or trial        |
| 20 |                    |                      | conduct                                                         |
| 21 |                    |                      |                                                                 |
| 22 |                    |                      |                                                                 |
| 23 |                    |                      |                                                                 |
| 24 | Auditing           | <a href="#">#23</a>  | Frequency and procedures for auditing trial conduct, if any,    |
| 25 |                    |                      | and whether the process will be independent from                |
| 26 |                    |                      | investigators and the sponsor                                   |
| 27 |                    |                      |                                                                 |
| 28 |                    |                      |                                                                 |
| 29 |                    |                      |                                                                 |
| 30 | Research ethics    | <a href="#">#24</a>  | Plans for seeking research ethics committee / institutional     |
| 31 | approval           |                      | review board (REC / IRB) approval                               |
| 32 |                    |                      |                                                                 |
| 33 |                    |                      |                                                                 |
| 34 | Protocol           | <a href="#">#25</a>  | Plans for communicating important protocol modifications        |
| 35 | amendments         |                      | (eg, changes to eligibility criteria, outcomes, analyses) to    |
| 36 |                    |                      | relevant parties (eg, investigators, REC / IRBs, trial          |
| 37 |                    |                      | participants, trial registries, journals, regulators)           |
| 38 |                    |                      |                                                                 |
| 39 |                    |                      |                                                                 |
| 40 | Consent or assent  | <a href="#">#26a</a> | Who will obtain informed consent or assent from potential       |
| 41 |                    |                      | trial participants or authorised surrogates, and how (see       |
| 42 |                    |                      | Item 32)                                                        |
| 43 |                    |                      |                                                                 |
| 44 |                    |                      |                                                                 |
| 45 |                    |                      |                                                                 |
| 46 | Consent or assent: | <a href="#">#26b</a> | Additional consent provisions for collection and use of         |
| 47 | ancillary studies  |                      | participant data and biological specimens in ancillary          |
| 48 |                    |                      | studies, if applicable                                          |
| 49 |                    |                      |                                                                 |
| 50 |                    |                      |                                                                 |
| 51 | Confidentiality    | <a href="#">#27</a>  | How personal information about potential and enrolled           |
| 52 |                    |                      | participants will be collected, shared, and maintained in       |
| 53 |                    |                      | order to protect confidentiality before, during, and after the  |
| 54 |                    |                      | trial                                                           |
| 55 |                    |                      |                                                                 |
| 56 |                    |                      |                                                                 |
| 57 |                    |                      |                                                                 |
| 58 | Declaration of     | <a href="#">#28</a>  | Financial and other competing interests for principal           |
| 59 |                    |                      |                                                                 |
| 60 |                    |                      |                                                                 |

Page 24

Page 13

Page 14

|    |                       |                      |                                                                 |
|----|-----------------------|----------------------|-----------------------------------------------------------------|
| 1  | interests             |                      | investigators for the overall trial and each study site         |
| 2  |                       |                      |                                                                 |
| 3  | Data access           | <a href="#">#29</a>  | Statement of who will have access to the final trial dataset,   |
| 4  |                       |                      | and disclosure of contractual agreements that limit such        |
| 5  |                       |                      | access for investigators                                        |
| 6  |                       |                      |                                                                 |
| 7  |                       |                      |                                                                 |
| 8  | Ancillary and post    | <a href="#">#30</a>  | Provisions, if any, for ancillary and post-trial care, and for  |
| 9  | trial care            |                      | compensation to those who suffer harm from trial                |
| 10 |                       |                      | participation                                                   |
| 11 |                       |                      |                                                                 |
| 12 |                       |                      |                                                                 |
| 13 | Dissemination policy: | <a href="#">#31a</a> | Plans for investigators and sponsor to communicate trial        |
| 14 | trial results         |                      | results to participants, healthcare professionals, the public,  |
| 15 |                       |                      | and other relevant groups (eg, via publication, reporting in    |
| 16 |                       |                      | results databases, or other data sharing arrangements),         |
| 17 |                       |                      | including any publication restrictions                          |
| 18 |                       |                      |                                                                 |
| 19 |                       |                      |                                                                 |
| 20 |                       |                      |                                                                 |
| 21 | Dissemination policy: | <a href="#">#31b</a> | Authorship eligibility guidelines and any intended use of       |
| 22 | authorship            |                      | professional writers                                            |
| 23 |                       |                      |                                                                 |
| 24 |                       |                      |                                                                 |
| 25 | Dissemination policy: | <a href="#">#31c</a> | Plans, if any, for granting public access to the full protocol, |
| 26 | reproducible          |                      | participant-level dataset, and statistical code                 |
| 27 | research              |                      |                                                                 |
| 28 |                       |                      |                                                                 |
| 29 |                       |                      |                                                                 |
| 30 | Informed consent      | <a href="#">#32</a>  | Model consent form and other related documentation given        |
| 31 | materials             |                      | to participants and authorised surrogates                       |
| 32 |                       |                      |                                                                 |
| 33 |                       |                      |                                                                 |
| 34 | Biological specimens  | <a href="#">#33</a>  | Plans for collection, laboratory evaluation, and storage of     |
| 35 |                       |                      | biological specimens for genetic or molecular analysis in       |
| 36 |                       |                      | the current trial and for future use in ancillary studies, if   |
| 37 |                       |                      | applicable                                                      |
| 38 |                       |                      |                                                                 |
| 39 |                       |                      |                                                                 |
| 40 |                       |                      |                                                                 |

Page 13

41 The SPIRIT checklist is distributed under the terms of the Creative Commons Attribution License CC-  
 42 BY-ND 3.0. This checklist can be completed online using <https://www.goodreports.org/>, a tool made  
 43 by the [EQUATOR Network](#) in collaboration with [Penelope.ai](#)  
 44  
 45  
 46  
 47  
 48  
 49  
 50  
 51  
 52  
 53  
 54  
 55  
 56  
 57  
 58  
 59  
 60

# BMJ Open

## ObesiStress: Stress Management in Obesity during a thermal spa residential programme – a protocol for a randomised controlled trial study

|                               |                                                                                                                                                                                                                                                                                                                                                                                                                                                                                                                                                                                                                                                                                                                                                                                                                                                                                                                                                                                                                                                                                                                                                                                                                                                                                                                                                                                                                                                                                                                                                                                                                                                                                                                                                                                                                                                                                                                                                                                                                                                                                                                                                                                                                                |
|-------------------------------|--------------------------------------------------------------------------------------------------------------------------------------------------------------------------------------------------------------------------------------------------------------------------------------------------------------------------------------------------------------------------------------------------------------------------------------------------------------------------------------------------------------------------------------------------------------------------------------------------------------------------------------------------------------------------------------------------------------------------------------------------------------------------------------------------------------------------------------------------------------------------------------------------------------------------------------------------------------------------------------------------------------------------------------------------------------------------------------------------------------------------------------------------------------------------------------------------------------------------------------------------------------------------------------------------------------------------------------------------------------------------------------------------------------------------------------------------------------------------------------------------------------------------------------------------------------------------------------------------------------------------------------------------------------------------------------------------------------------------------------------------------------------------------------------------------------------------------------------------------------------------------------------------------------------------------------------------------------------------------------------------------------------------------------------------------------------------------------------------------------------------------------------------------------------------------------------------------------------------------|
| Journal:                      | <i>BMJ Open</i>                                                                                                                                                                                                                                                                                                                                                                                                                                                                                                                                                                                                                                                                                                                                                                                                                                                                                                                                                                                                                                                                                                                                                                                                                                                                                                                                                                                                                                                                                                                                                                                                                                                                                                                                                                                                                                                                                                                                                                                                                                                                                                                                                                                                                |
| Manuscript ID                 | bmjopen-2018-027058.R2                                                                                                                                                                                                                                                                                                                                                                                                                                                                                                                                                                                                                                                                                                                                                                                                                                                                                                                                                                                                                                                                                                                                                                                                                                                                                                                                                                                                                                                                                                                                                                                                                                                                                                                                                                                                                                                                                                                                                                                                                                                                                                                                                                                                         |
| Article Type:                 | Protocol                                                                                                                                                                                                                                                                                                                                                                                                                                                                                                                                                                                                                                                                                                                                                                                                                                                                                                                                                                                                                                                                                                                                                                                                                                                                                                                                                                                                                                                                                                                                                                                                                                                                                                                                                                                                                                                                                                                                                                                                                                                                                                                                                                                                                       |
| Date Submitted by the Author: | 22-Oct-2019                                                                                                                                                                                                                                                                                                                                                                                                                                                                                                                                                                                                                                                                                                                                                                                                                                                                                                                                                                                                                                                                                                                                                                                                                                                                                                                                                                                                                                                                                                                                                                                                                                                                                                                                                                                                                                                                                                                                                                                                                                                                                                                                                                                                                    |
| Complete List of Authors:     | <p>DUTHEIL, Frédéric; Occupational Medicine, University Hospital CHU G. Montpied; Australian Catholic University, Faculty of Health, School of Exercise Science</p> <p>CHAPLAIS, Elodie; Australian Catholic University, School of Exercise Science; University of Lorraine; DevAH Laboratory (EA 3450), Exercise Sciences</p> <p>VILMANT, Audrey; Occupational Medicine, University Hospital CHU G. Montpied</p> <p>COURTEIX, Daniel; Laboratoire AME2P - Université Clermont Auvergne; Australian Catholic University, School of Exercise Science</p> <p>DUCHE, Pascale; AME2P Laboratory - Université Clermont Auvergne</p> <p>ABERGEL, Armand; Université Clermont Auvergne, CNRS, UMR 6284, University Hospital of Clermont-Ferrand, CHU Clermont-Ferrand, Hepatology Gastroenterology</p> <p>PFABIGAN, Daniela M. ; School of Psychological and Cognitive Sciences, PKU-IDG/McGovern Institute for Brain Research, Beijing Key Laboratory of Behavior and Mental Health, Peking University</p> <p>HAN, Shihui; School of Psychological and Cognitive Sciences, PKU-IDG/McGovern Institute for Brain Research, Beijing Key Laboratory of Behavior and Mental Health, Peking University</p> <p>MONDILLON, Laurie; University Clermont Auvergne, and LAPSCO-CNRS, Psychology</p> <p>VALLET, Guillaume T.; Université Clermont Auvergne, CNRS, LaPSCo, Physiological and Psychosocial Stress</p> <p>Mermillod, Martial; Centre Hospitalier Universitaire Grenoble Alpes</p> <p>BOUDET, Gil; Occupational Medicine, University Hospital CHU G. Montpied</p> <p>Obert, Philippe; University of Avignon, Laboratory of Pharm-Ecology Cardiovascular EA4278</p> <p>Izem, Omar; Laboratory of Cardiovascular Pharm-ecology (LaPEC EA4278), Avignon University</p> <p>MIOLANNE-DEBOUIT, Magalie; University Hospital of Clermont-Ferrand, CHU Clermont-Ferrand, Unit of Human Nutrition</p> <p>Farigon, Nicolas; University Hospital of Clermont-Ferrand, CHU Clermont-Ferrand, Unit of Human Nutrition</p> <p>Pereira, Bruno; University Hospital CHU Clermont-Ferrand,</p> <p>Boirie, Yves; Université Clermont Auvergne, INRA, CRNH, University Hospital of Clermont-Ferrand, CHU Clermont-Ferrand, Unit of Human Nutrition</p> |

1  
2  
3  
4  
5  
6  
7  
8  
9  
10  
11  
12  
13  
14  
15  
16  
17  
18  
19  
20  
21  
22  
23  
24  
25  
26  
27  
28  
29  
30  
31  
32  
33  
34  
35  
36  
37  
38  
39  
40  
41  
42  
43  
44  
45  
46  
47  
48  
49  
50  
51  
52  
53  
54  
55  
56  
57  
58  
59  
60

|                                  |                                                                       |
|----------------------------------|-----------------------------------------------------------------------|
| <b>Primary Subject Heading</b> : | Cardiovascular medicine                                               |
| Secondary Subject Heading:       | Nutrition and metabolism, Sports and exercise medicine, Public health |
| Keywords:                        | obesity, stress, prevention, heart rate variability, spa bath         |
|                                  |                                                                       |

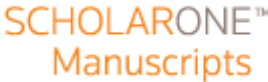

# ObesiStress: Stress Management in Obesity during a thermal spa residential programme – a protocol for a randomised controlled trial study

Frédéric DUTHEIL<sup>1,2</sup>, Elodie CHAPLAIS<sup>2,4,5,15</sup>, Audrey Vilmant<sup>1</sup>, Daniel COURTEIX<sup>2,3</sup>, Pascale DUCHE<sup>3</sup>, Armand ABERGEL<sup>6</sup>, Daniela M. PFABIGAN<sup>7</sup>, Shihui HAN<sup>7</sup>, Laurie MONDILLON<sup>8</sup>, Guillaume T. VALLET<sup>8</sup>, Martial MERMILLOD<sup>9,10</sup>, Gil BOUDET<sup>1</sup>, Philippe OBERT<sup>2,11</sup>, Omar IZEM<sup>11</sup>, Magalie MIOLANNE-DEBOUIT<sup>12</sup>, Nicolas FARIGON<sup>12</sup>, Bruno PEREIRA<sup>13</sup>, Yves BOIRIE<sup>14</sup>

## Authors' affiliations:

<sup>1</sup> Université Clermont Auvergne, CNRS, LaPSCo, Physiological and Psychosocial Stress, University Hospital of Clermont-Ferrand, CHU Clermont-Ferrand, Preventive and Occupational Medicine, WittyFit, Clermont-Ferrand, France

<sup>2</sup> Australian Catholic University, Faculty of Health, School of Exercise Science, Melbourne, Victoria 3065, Australia

<sup>3</sup> Université Clermont Auvergne, Laboratory of Metabolic Adaptations to Exercise under Physiological and Pathological Conditions (AME2P - EA 3533), Clermont-Ferrand, France

<sup>4</sup> Australian Catholic University, Faculty of Health Science, School of Exercise Science, Strathfield, NSW 2135, Australia

<sup>5</sup> University Hospital of Clermont-Ferrand, CHU Clermont-Ferrand, Biostatistics Unit, Clinical research and Innovation Department (DRCI), Clermont-Ferrand, France

<sup>6</sup> Université Clermont Auvergne, CNRS, UMR 6284, University Hospital of Clermont-Ferrand, CHU Clermont-Ferrand, Hepatology Gastroenterology, Clermont-Ferrand, France

<sup>7</sup> School of Psychological and Cognitive Sciences, PKU-IDG/McGovern Institute for Brain Research, Beijing Key Laboratory of Behaviour and Mental Health, Peking University, Beijing, China

<sup>8</sup> Clermont Auvergne University, CNRS, LaPSCo, Physiological and Psychosocial Stress, Clermont-Ferrand, France

<sup>9</sup> LNPC, CNRS, Université Grenoble Alpes, Université Savoie Mont Blanc, Grenoble, France

<sup>10</sup> Institut Universitaire de France, Paris, France

<sup>11</sup> Laboratory of Cardiovascular Pharm-ecology (LaPEC EA4278), Avignon University, Avignon, France

<sup>12</sup> University Hospital of Clermont-Ferrand, CHU Clermont-Ferrand, Unit of Human Nutrition, Clermont-Ferrand, France.

1  
2  
3 <sup>13</sup> University Hospital of Clermont-Ferrand, CHU Clermont-Ferrand, Biostatistics Unit, Clinical  
4 research and Innovation Department (DRCI), Clermont-Ferrand, France

5  
6 <sup>14</sup> Université Clermont Auvergne, INRA, CRNH, University Hospital of Clermont-Ferrand, CHU  
7 Clermont-Ferrand, Unit of Human Nutrition, Clermont-Ferrand, France.

8  
9 <sup>15</sup> Université de Lorraine, Laboratory "Development, Adaptation and Disability" (DevAH - EA 3450),  
10 Nancy, France  
11  
12  
13

14 **Corresponding author** – CHAPLAIS Elodie (PhD), University of Lorraine, Laboratory "Development,  
15 Adaptation and Disability" (EA 3450), Faculty of Sports Sciences and Faculty of Medicine, 9 avenue  
16 de la Forêt de Haye, CS 50184, F-54505 Vandœuvre-lès-Nancy, France; elodie.chaplais@acu.edu.au  
17  
18  
19  
20  
21  
22

23 **Keywords:** obesity, stress, prevention, heart rate variability, spa bath

24 **Word count:** 4023 words (without abstract + strength and limitation)

25  
26 **Number of figures:** 1

27  
28 **Protocol version:** version 1, 10/2018  
29  
30  
31  
32  
33  
34  
35  
36  
37  
38  
39  
40  
41  
42  
43  
44  
45  
46  
47  
48  
49  
50  
51  
52  
53  
54  
55  
56  
57  
58  
59  
60



## Abstract

**Introduction:** Stress and obesity are two public health issues. The relationship between obesity and stress is biological through the actions of stress on the major hormones that regulate appetite (leptin, ghrelin). Many spa resorts in France are specialised in the treatment of obesity, but no thermal spa currently proposes a specific programme to manage stress in obesity. The ObesiStress protocol has been designed to offer a new residential stress management programme. This thermal spa treatment of obesity implement stress management strategies as suggested by International recommendations.

**Methods and analysis:** 140 overweight or obese participants with a Body Mass Index (BMI) >25 kg.m<sup>-2</sup> and aged over 18 years will be recruited. Participants will be randomised into two groups: a control group of usual practice (restrictive diet, physical activity and thermal spa treatment) and an intervention group with stress management in addition to the usual practice. In the present protocol, parameters will be measured on five occasions (at inclusion, at the beginning of the spa (day 0), at the end of the spa (day 21), and at 6 and 12 months). The study will assess the participants' heart rate variability, cardiac remodelling and function, electrodermal activity, blood markers, anthropometric profile, body composition, psychology and quality of life via the use of questionnaires and bone parameters.

**Ethics and dissemination:** The ObesiStress protocol complies with the ethics guidelines for Clinical Research and has been approved by the ethics committee (CPP Sud-Est VI, Clermont-Ferrand - ANSM: 2016-A01774-47). This study aims to highlight the efficacy of a 21-day thermal spa residential programme of stress management in obesity through objective measurements of well-being and cardiovascular morbidity. Results will be disseminated during several research conferences and articles published in peer-reviewed journals.

**Trial Registration:** NCT 03578757

**Strengths and limitations of this study:**

- Reliability and validity of a 21-day specific thermal spa residential programme on stress management in the treatment of obesity
- Better comprehension of the psychology and psychological mechanisms involved in stress management in obesity.
- A 12-month mixed gender longitudinal study
- Inability to accurately account for the long-term cost-effective benefits of the study

For peer review only

## Introduction

Stress and obesity are two public health issues.<sup>1,2</sup> Stress can lead to obesity, is a major stress factor,<sup>3</sup> via inappropriate eating behaviours<sup>4</sup>. Furthermore, stressed people are also those who have the greatest difficulty losing weight.<sup>5</sup> The relationship between obesity and stress is biological through the action of stress on the major hormones which regulate appetite (leptin, ghrelin).<sup>6,7</sup> The relationship between obesity and stress is so strong that proposals for international recommendations suggest the implementation of stress management programmes in obesity for sustainable weight loss.<sup>8</sup>

Among the multiple physical and psychological consequences of stress and obesity, increased mortality and cardiovascular morbidity seem to be the main concern.<sup>9</sup> Stress and obesity alter the functioning of the autonomic nervous system.<sup>10-12</sup> A deregulation of the sympatho-vagal balance is a major factor of morbidity cardiovascular mortality.<sup>13</sup> Conveniently, the sympatho-vagal balance can be measured easily and without pain using heart rate variability (HRV), which is a biomarker of both stress and morbidity/mortality.<sup>10,14,15</sup> Stress and obesity also cause arterial ischaemic pathology<sup>16</sup> through complex mechanisms involving changes in endothelial and arterial atherosclerosis.<sup>16</sup> These microvascular changes are linked to systemic inflammation caused by stress<sup>17</sup> and obesity.<sup>18</sup>

The thermal spa resort in Vichy, as well as other spa centres in France, already possesses expertise in obesity treatment through physical activity, diet, and hydrotherapy. However, no spa resort has ever proposed the inclusion of a stress-management programme in obesity treatment. Non-pharmacological stress management can be achieved through psychological interventions (i.e. physical<sup>19</sup> and psychoanalytical approaches<sup>20</sup>, cognitive behavioural therapy,<sup>21</sup> acceptance and commitment therapy,<sup>22</sup><sup>23</sup> or mindfulness<sup>24,25</sup>), physical activity,<sup>26,27</sup> and the improvement of eating disorders induced by stress.<sup>28</sup> The benefits of physical activity on physical and mental health are indisputable, at any age, and with any activity.<sup>29</sup>

The main hypothesis of this project is that a thermal spa residential programme (21 days) of stress management in obesity will demonstrate its efficacy through objective measurements of well-being and cardiovascular morbidity via a randomised controlled design that compares a group with stress management and a group without stress management (both groups will benefit from the same spa treatments, physical activity, and diet).

## Objectives

The main objective will be to assess the ability of a 21-day residential spa programme of stress management in the treatment of obesity to increase heart rate variability; a biomarker of both stress and morbidity/mortality.

Secondary outcomes will be (1) to demonstrate an improvement in stress- and obesity-related variables following the short residential spa programme, (2) to study the influence of genetic polymorphisms on stress, obesity, and on the response to our stress management programme, (3) to examine the relationship between stress- and obesity-related variables, (4) to propose a salient biomarker or a salient composite index of biomarkers of stress in obesity and (5) to study the effect of adherence to the programme during follow-up on stress- and obesity-related variables.

## Methods

The TIDieR checklist can be found as supplementary file (S1).

**Protocol design:** This one-year randomised controlled study with repeated measurements at five time points (inclusion, at the start and the end of the spa programme, at 6 and 12 months) will allow us to understand the effect of a 21-day residential spa programme of stress management in the treatment of obesity through the measurement of well-being and cardiovascular morbidity.

For this study, two randomised groups of overweight or obese participants will be compared: one will receive the usual 21-day thermal spa residential programme while the other will receive the 21-day thermal spa residential programme plus a psychological intervention (Figure1).

## Randomisation

Randomisation will be stratified by BMI category (25-30, 30-35, >35), sex, and levels of stress (visual analog scale of stress <50, between 50 and 80, >80), using a minimisation approach. A permuted-block randomisation (i.e. random block sizes) will be conducted using a computer-generated random allocation (Stata software, version 13, StataCorp, College Station, USA), with a 1:1 allocation ratio,

1  
2  
3 ensuring the complete randomness of the assignment of a participant to each randomised group. To  
4  
5 guarantee the concealment of the allocation, the participants will be randomised after they have clearly  
6  
7 met the inclusion criteria and have provided written consent (supplementary file – S2).  
8  
9

### 10 11 ***Selection criteria:***

12  
13 ***Inclusion criteria:*** Volunteers will be overweight or obese participants aged over 18 years who wish to  
14  
15 follow a thermal spa residential programme for the treatment of obesity. We will also promote the study  
16  
17 through advertisements in local newspapers and on the radio. Volunteers will be screened by telephone  
18  
19 interview or directly by spa physicians. A participant's weight must have been stable over the last three  
20  
21 months, with no uncontrolled cardiac, hepatic, renal or endocrine diseases.<sup>2</sup> Stress at baseline will not  
22  
23 be an inclusion criteria but an explanatory/independent variable. In compliance with Human Ethics  
24  
25 guidelines, participants will have to be covered by social health insurance and will have to sign consent  
26  
27 forms.  
28  
29

30  
31 ***Exclusion criteria:*** Volunteers participating in the study will be excluded if major treatment and/or  
32  
33 protocol deviations are observed.<sup>14</sup> Drugs and medical conditions that significantly affect the primary  
34  
35 outcome (heart rate variability) will also be exclusion criteria (e.g. alpha or beta blockers, arrhythmia or  
36  
37 conduction disorders such as bundle branch block, atrioventricular heart block).<sup>30</sup> Bariatric surgery is  
38  
39 also an exclusion criterion.  
40  
41

42  
43 ***Power analysis:*** The rationale for the sample size calculation is based on HRV, which is a biomarker of  
44  
45 both stress and morbidity/mortality.<sup>10 14 15</sup> Specifically, within the multiple parameters of HRV, we  
46  
47 considered the log Low-Frequency/High-Frequency (LF/HF) for the sample size calculation because it  
48  
49 is the parameter that traditionally represents sympathovagal balance (see description of LF/HF below in  
50  
51 the description of the primary outcome).<sup>10 14</sup> A log LF/HF with low values is associated with a good  
52  
53 adaptation of the autonomic nervous system. Based on our results from a pilot study (data not  
54  
55 published),<sup>2</sup> we hope to highlight an absolute difference of 12% between the groups with regard to the  
56  
57 decrease of log LF/HF at one year after the stress management programme. For a standard deviation of  
58  
59 20%, the expected size will be around 0.60. For a two-sided type I error of 5%, we will need to include  
60

1  
2  
3 59 participants per group to achieve a statistical power of 90%. Finally, the recruitment of 70 patients  
4  
5 per arm is proposed in order to take into account lost to follow-up.  
6  
7

8  
9 **Participants:** As previously stated, participants engaged in this protocol will be mixed gender  
10  
11 overweight or obese volunteers aged over 18 years. Following approval from the ethics committee, and  
12  
13 based on our calculation, a total of 70 volunteers will be enrolled per group (i.e. a total of 140  
14  
15 participants) to account for potential dropouts. All participants will be given written information  
16  
17 regarding the project and will have to sign consent forms before enrolment. Participants will be recruited  
18  
19 from the usual clients at the spa resort in Vichy, through healthcare workers (physicians, dietitians,  
20  
21 physiotherapist, etc.), or through advertisements. Inclusions will be carried out at the University Hospital  
22  
23 in Clermont-Ferrand or at the thermal spa resort in Vichy.  
24  
25

26  
27  
28 **Usual thermal spa care:** All participants will undergo the usual thermal spa treatment that combines the  
29  
30 correction of eating disorders (and a negative energy balance of 500 kcal/day), physical activity (2h30  
31  
32 per day, minimum), thermal spa treatment (2h per day, minimum), and health education (1h30 per day,  
33  
34 minimum: cooking, nutrition and physical activity classes, etc.). Physical activity will be diverse  
35  
36 (endurance, strength, circuit training) and personalised for each participant.  
37  
38

39  
40  
41 **Psychological interventions:** Participants randomised to the intervention group will benefit from  
42  
43 psychological interventions based on validated approaches to stress (3 x 1h30 per week, i.e. 9 sessions  
44  
45 in total). Participants will attend psychological sessions in groups of fewer than 10 individuals.  
46  
47 Individual meetings with the psychologist will occur at least twice: at the beginning of the residential  
48  
49 programme and at the end. Psychological interventions will include various validated approaches to  
50  
51 work-related stress: physical<sup>19</sup> and psychoanalytic<sup>20</sup> approaches, cognitive behavioural therapy,<sup>21</sup>  
52  
53 acceptance and commitment therapy,<sup>23 31</sup> mindfulness,<sup>24 25</sup> etc. Participants will have to acquire  
54  
55 techniques in order to become autonomous and pursue at-home psychological training. The 9  
56  
57 psychological sessions will be the following: 1) stress management and lack of self-confidence, 2)  
58  
59 cognitive behavioural therapy, 3) body-centred approach: body language, 4) management of emotions,  
60

1  
2  
3 5) identity approach: concept and self-image, 6) cognitive approach (information processing), 7)  
4  
5 sophrology – relaxation, 8) food and addictive behaviour, and 9) psychopathological approach and  
6  
7 anxiety disorders. Each session will be constructed and validated by a psychologist specialised in the  
8  
9 session's field and already working in the management of obese individuals. The aim is to build a  
10  
11 psychological programme that can be easily replicated for long-term use after evidence based proof of  
12  
13 success.  
14  
15  
16  
17

18 **Follow-up:** After the intervention phase of the study, participants will undergo a one-year at-home  
19  
20 follow-up with measurements at 6 and 12 months.  
21  
22  
23

24 **Measurements:** Each participant will perform a battery of tests (described below). As previously  
25  
26 described, data collection will be performed 5 times (at inclusion, at the start and the end of the spa  
27  
28 programme, and at 6 and 12 months), with the exception of DXA and pQCT, which will be performed  
29  
30 at inclusion and after 12 months, and cardiac remodelling and function, which will be performed at  
31  
32 inclusion and after 6 months.  
33  
34  
35  
36

37 **Primary outcome:**

38  
39 Heart rate variability: Our primary outcome will be changes in HRV parameters. HRV parameters will  
40  
41 be assessed over 26 hours with a heart rate transmitter belt simply positioned on the chest, with a 26h  
42  
43 recording time, a beat per minute range of 25-240, and a respiratory rate range of 3-70 (Zephyr™  
44  
45 BioHarness™ BT, Zephyr Technology, Annapolis, USA). The HRV data will be examined according  
46  
47 to the recommendations of the European Society of Cardiology and the North American Society (Task  
48  
49 Force). HRV will be explored in two domains: time and frequency.<sup>32</sup> The methodology developed by  
50  
51 our team will also be applied.<sup>33</sup> Premature beats will be visually checked and automatically discarded.  
52  
53 In the time domain, we will analyse R-R intervals, the standard deviation of the R-R intervals (SDNN),  
54  
55 the square root of the mean squared difference of successive R-R intervals (rMSSD), and the number of  
56  
57 adjacent N-N differing by more than 50 milliseconds divided by the total number of N-N intervals  
58  
59 (pNN50). The rMSSD and pNN50 are associated with high-frequency power (HF) and hence  
60

1  
2  
3 parasympathetic activity. In the spectral domain, we will analyse low-frequency (LF; 0.04–0.15 Hz) and  
4 high-frequency (0.15–0.4 Hz) power. LF is an index of both sympathetic and parasympathetic activity,  
5 and HF represents the main efferent parasympathetic (vagal) activity to the sinus node. Very low  
6 frequency (VLF; 0.003–0.04 Hz) partially reflects variations in the activity of the renin – angiotensin  
7 system, thermoregulatory mechanisms, and the function of peripheral chemoreceptors. LF and HF will  
8 also be assessed in normalised units (nu), i.e. the relative value of each power component in proportion  
9 to the total power minus the VLF component. Thus, LFnu and HFnu are suggested to represent the best  
10 sympathetic and parasympathetic activity, respectively. The LF/HF ratio, i.e. the sympathovagal  
11 balance, will also be calculated.<sup>14</sup>  
12  
13  
14  
15  
16  
17  
18  
19  
20  
21  
22  
23

#### 24 ***Secondary outcomes:***

25  
26 Table 1 summarises the secondary outcomes of the project.

27  
28 *Anthropometry and clinical parameters* will be measured, including height (*m*), body mass (*kg*), or blood  
29 pressure (*mmHg*). Waist circumference (*cm*) will be measured at mid-abdomen, i.e. the midpoint  
30 between the subcostal and supra-iliac landmarks, in accordance with the World Health Organization  
31 protocol.<sup>34</sup>  
32  
33  
34  
35  
36

37 *Body Composition:* Body composition (muscle mass and fat mass) will be measured by DXA (DXA,  
38 QDR-4500A, Hologic, Inc., Waltham, MA)<sup>35</sup> and by an impedance meter.<sup>36</sup>  
39  
40

41 *Biomarkers of stress and cardiovascular risk:* Skin conductance will be measured using wrist band  
42 electrodes with sampling rates at 2 Hz, 4 Hz, 8 Hz, 16 Hz and 32 Hz during phases 1 to 3. The SC sensor  
43 (Q-Sensor®-Affectiva®, Massachusetts Institute of Technology, USA) is set on a wristband and has a  
44 24-hour battery life when recording. In addition, it will measure wrist movements with a built-in 3-axis  
45 accelerometer.<sup>37</sup>  
46  
47  
48  
49  
50

51 *Blood flow velocity and myocardial longitudinal strain* will be measured by speckle echocardiography  
52 (Vivid Q, GE Healthcare, USA). All 2-dimensional, time motion, Doppler and 2D-strain acquisitions  
53 and measurements will be performed according to recent guidelines.<sup>38 39</sup> Left ventricular (LV) volumes  
54 and ejection fractions (EF) will be measured using the Simpson biplane method. LV mass (LVM) will  
55  
56  
57  
58  
59  
60



1  
2  
3 be calculated with the Devereux formula and indexed for height (Cornell adjustment). Pulsed-  
4  
5 Doppler LV transmitral velocities, including early (E) and atrial (A) waves, will be obtained in the apical  
6  
7 4-chamber view. Tissue Doppler Imaging (TDI) measurements of myocardial systolic (S'), early  
8  
9 diastolic (E') and atrial (A') velocities will be assessed at the mitral annulus level in the apical 4- and 2-  
10  
11 chamber views. The E/Em ratio will be used as an index of LV filling pressure.<sup>40</sup> Left atrium (LA)  
12  
13 volume will be assessed on apical 4- and 2 chamber views. A gradation of LV diastolic dysfunction  
14  
15 will be obtained according to recent guidelines.<sup>40</sup> 2D cine-loops (frame rate >70 ips) of at least 5 cycles  
16  
17 will be recorded in the short-axis views (base, md, apex), as well as in the apical 4-, 3- and 2-chamber  
18  
19 views. 2D-strain analysis will be performed post-processing using EchoPAC 201 TM software (GE  
20  
21 Healthcare, USA). Longitudinal and circumferential strains and strain rates (SR), as well as rotations at  
22  
23 the apex and base, will be directly obtained from the 6-segment model. Twist mechanics will be  
24  
25 computed from apical and basal rotational data using dedicated software (Scilab, Paris, France). For  
26  
27 each view, the 3 cardiac cycles displaying the best image quality will be selected. Blood pressure and  
28  
29 heart rate will be continuously monitored, and the systolic meridional wall stress, an index of afterload,  
30  
31 will be calculated. LV end-diastolic volumes will also be obtained as preload indices.  
32  
33

34  
35 *Endocrine assays:* Blood samples will be collected by a qualified nurse after participants have fasted  
36  
37 overnight. Blood will be collected using a venipuncture of the brachial vein. After collection, blood will  
38  
39 be centrifuged and aliquots will be stored (-80 °) for subsequent analysis. Basic biology (e.g.  
40  
41 triglycerides, cholesterol, LDLC, HDLC, HbA1c)<sup>35</sup>, as well as all other biochemical determinants (e.g.  
42  
43 leptin,<sup>35</sup> ghrelin,<sup>7 41</sup> BDNF,<sup>42-44</sup> IL-1 $\beta$ ,<sup>35</sup> IL-6,<sup>35</sup> IL-1,<sup>35</sup> TNF $\alpha$ ,<sup>35</sup> NPY,<sup>45</sup> cortisol,<sup>46 47</sup> DHEAS<sup>46 47</sup>), will  
44  
45 be assessed in the biochemistry laboratory at the University Hospital in Clermont-Ferrand. All analyses  
46  
47 will be conducted by the same technician. Polymorphism of the angiotensin converting enzyme<sup>48-51</sup> and  
48  
49 polymorphism of the serotonin<sup>52-54</sup>, as well as telomere lengths,<sup>55</sup> will be measured via blood cells, all  
50  
51 of which are linked with stress.  
52

53  
54 *Complementary measurements:* Stress, fatigue, and sleep (visual analogue scale of 100 mm),<sup>10</sup> burnout  
55  
56 (Maslach Burn Out Inventory),<sup>56</sup> depression and anxiety (Hospital Anxiety and Depression Scale, STAI-  
57  
58 Y and the 7-item Hamilton scale for anxiety),<sup>57-59</sup> mindfulness (Freiburg Mindfulness Inventory),<sup>22,23</sup>  
59  
60 coping strategies (Brief COPE Questionnaire),<sup>60</sup> emotions (Emotion Regulation Questionnaire),<sup>61</sup>

1  
2  
3 perception of work (Karasek's Job Content Questionnaire),<sup>62 63</sup> self-efficacy (perceived self-efficacy  
4 scale),<sup>64</sup> alexithymia (Toronto Alexithymia Scale),<sup>65-67</sup> illness perception (Brief Illness Perception  
5 Questionnaire (B-IPQ)),<sup>68 69</sup> metacognition (MetaCognition Questionnaire),<sup>70</sup> general health (36-item  
6 General health questionnaire),<sup>71</sup> lifestyle (smoking, alcohol, etc.),<sup>10</sup> demographics (such as marital  
7 status, number of children, etc.), nutrition (3-day self-report questionnaire with a face-to-face validation  
8 with a dietitian)<sup>2</sup> and physical activity (Recent Physical Activity Questionnaire (RPAQ))<sup>72</sup> will be  
9 obtained through questionnaires.

10  
11  
12  
13  
14  
15  
16  
17  
18 Bone parameters: Bone microarchitecture will be measured by Peripheral Quantitative Computed  
19 Tomography (pQCT, XCT 3000 Stratec Medizintechnik Pforzheim, Germany).<sup>73-75</sup> Bone mineral  
20 content ( $g/cm$ ), volumetric cortical and trabecular BMC ( $mg/cm^3$ ), total area ( $mm^2$ ), cortical and  
21 trabecular area ( $mm^2$ ) and density ( $g/cm^2$ ), bone strength ( $mm^3$ ), will be assessed by 2 mm thick  
22 tomographic slices at the distal (4%) and proximal (66%) site of the non-dominant tibia and radius. Scan  
23 speed and voxel size will be 20 mm/s and 0.4 mm, respectively. To ensure the quality of the  
24 measurements, calibration checks will be performed by scanning a standard phantom with known  
25 densities prior to each scan. Bone densitometry will be measured by Dual energy X-ray Absorptiometry  
26 (DXA, QDR-4500A, Hologic, Inc., Waltham, MA). Bone mineral density (BMD,  $g/cm^2$ ), bone mineral  
27 content (BMC, g), and bone area ( $cm^2$ ) will be determined for each participant. The DXA measurements  
28 will be taken for whole body, lumbar spine (L2-L4) and non-dominant hip (including the femoral neck,  
29 trochanteric and intertrochanteric regions). All DXA scans will be conducted by the same technician  
30 and quality assurance checks will be routinely performed. The in-vivo coefficient of variation (CV) is  
31 0.5%.

32  
33  
34  
35  
36  
37  
38  
39  
40  
41  
42  
43  
44  
45  
46  
47 Adherence to the physical activity, nutrition, and psychological techniques will be retrieved. Physical  
48 activity will be assessed using the RPAQ at M6 and M12.<sup>72</sup> Nutrition will be assessed at M6 and M12  
49 through a three-day self-report questionnaire with a face-to-face validation with a dietitian.<sup>2</sup> The use of  
50 psychological techniques will be measured by monthly self-report questionnaires (number of times each  
51 technique was used per month).

1  
2  
3 **Statistical analysis:** Statistical analysis will be performed using the Stata software (version 13; Stata-  
4 Corp, College Station, Tex., USA). All statistical tests will be two-sided and  $p < 0.05$  will be considered  
5 significant. The data will be analysed as intention-to-treat. After testing for normal distribution (Shapiro-  
6 Wilk test), the data will be treated either by parametric or nonparametric analysis according to statistical  
7 assumptions. Inter-group comparisons will be performed 1) without adjustment and 2) adjusting on  
8 possible confounding factors.

9  
10 To highlight that the spa residential programme will have long-term benefits (one year) on the  
11 biomarkers of stress, the comparisons will be performed using the Student t-test or the Mann-Whitney  
12 test if the t-test assumptions are not respected (normality and homoscedasticity analysed using the  
13 Fisher-Snedecor test). The results will be expressed as effect size and 95% confidence intervals. This  
14 primary analysis will be completed by multivariable analyses (linear regression with logarithmic  
15 transformation of dependent outcomes if necessary) considering an adjustment on covariates fixed  
16 according to univariate results, clinical and epidemiological relevance (notably age, gender, baseline  
17 BMI and baseline stress levels) and adherence to physical activity, nutrition, and the use of  
18 psychological techniques. The results will be expressed as regression coefficients and 95% confidence  
19 intervals.

20  
21 Comparisons between groups will be performed in a similar way as presented previously for quantitative  
22 outcomes. Comparisons concerning categorical variables will be performed using Chi-squared or, when  
23 appropriate, the Fischer-exact test. The results will be expressed as absolute risk differences and 95%  
24 confidence intervals. The multivariable analysis will then be conducted using linear and generalised  
25 linear models according to the statistical nature of the dependent endpoint. The results will be expressed  
26 as regression coefficients or relative risks and 95% confidence intervals.

27  
28 Moreover, the relationships between the quantitative parameters will be analysed using correlation  
29 coefficients (Pearson or Spearman depending on the statistical distribution). Considering the several  
30 multiple comparisons, a correction of the type I error will be applied (Sidak's correction). The  
31 comparisons of the correlation coefficients (in different groups of subjects and within a single group of  
32 subjects) will be performed using a Fisher's Z transformation<sup>76</sup> and Williams' T2 statistic<sup>77</sup>.  
33  
34 Multidimensional factorial analyses will be performed to complete these statistical analyses.

1  
2  
3 Concerning the longitudinally collected parameters, mixed models will be performed to study fixed  
4 effects (group, time point evaluations and their interactions) , taking into account the between and within  
5 subject variability (as random effect). For continuous endpoints, the normality of the residuals will be  
6 assessed using the Shapiro-Wilk test.  
7  
8  
9

10  
11 In addition, these analyses will be completed using ANCOVA with the baseline values to study the  
12 differences during follow-up (end of the spa programme, 6 and 12 months).<sup>78</sup> Normality of residuals  
13 will be verified.  
14  
15  
16

17  
18 A sensitivity analysis will be carried out to study the statistical nature of missing data (random or not)  
19 and then to apply the most appropriate imputation data method (multiple imputation data, last  
20 observation carried out). The baseline characteristics of participants with a complete follow-up and those  
21 lost to follow-up will be compared with the aforementioned statistical tests.  
22  
23  
24  
25  
26  
27

### 28 **Radiation Exposure and Harm**

29  
30 Both DXA and pQCT provide measurements of the body composition and bone properties by exposing  
31 participants to low-level radiation: 0.0056 mSv from DXA scans (*whole body, lumbar and hip*) and  
32 0.0014 mSv from the pQCT scans (*tibia and radius measurements*)<sup>79</sup>. Over the duration of each study,  
33 the effective administered dose will be 0.014 mSv.  
34  
35  
36  
37

38  
39 A Harms section was not considered in the protocol, but this kind of intervention was considered to be  
40 very low risk by the ethics committee.  
41  
42  
43  
44

### 45 **Confidentiality and blind assessments**

46  
47 The participants and care providers will not be blinded to the participants' randomisation group.  
48 However, in order to reduce the level of bias, the assessors for most outcomes will be blinded to each  
49 participant's assigned group, e.g. for HRV, biological measures, or bone parameters. All outcome data  
50 will remain blinded until the end of the study. Patient's data will be de-identified and all data will be  
51 treated anonymously.  
52  
53  
54  
55  
56  
57

### 58 **Patient and Public Involvement**

1  
2  
3 The thermal spa centre in Vichy, in collaboration with the Preventive and Occupational Medicine  
4 Department of the University Hospital in Clermont-Ferrand, have identified and addressed the following  
5 priorities: prevention, obesity, weight loss, stress, cardiovascular morbidity. We are grateful for the  
6 opinion of the volunteers and professionals at the Vichy Spa Centre concerning the psychological  
7 intervention. Conferences and meetings with participants will be organised in order to provide feedback  
8 from this research.  
9  
10  
11  
12  
13  
14  
15  
16  
17

### 18 **Ethical Considerations and Dissemination**

19  
20 The ObesiStress protocol complies with the ethics guidelines for Clinical Research and has been  
21 approved by the ethic committee (Comités de Protection des Personnes, Sud-Est VI, Clermont-Ferrand  
22 – National Agency for Medical Security: 2016-A01774-47), the protocol has also been registered on  
23 clinicaltrials.gov (NCT 03578757). In accordance with ethical considerations, the chief investigator is  
24 responsible for ensuring that participants understand the potential risks and benefits of taking part in the  
25 study. Moreover, the chief investigator is responsible for obtaining written consent from the participants.  
26 The results will be disseminated at several research conferences and in articles published in peer-  
27 reviewed journals.  
28  
29  
30  
31  
32  
33  
34  
35  
36  
37  
38

### 39 **Discussion**

40  
41 The ObesiStress protocol has been designed to provide a better understanding of the effect of a spa  
42 residential programme combined with a stress management programme on the improvement of heart  
43 rate variability in the treatment of obesity. The creation of a new thermal programme would allow new  
44 innovative approaches for stress management in obesity. The long-term success of lifestyle interventions  
45 such as those proposed in the prevention of obesity is adherence to the treatment (nutrition, physical  
46 activity, psychology).<sup>80</sup> We previously demonstrated that a spa programme may play a major role in  
47 sustainable lifestyle changes.<sup>35</sup> Due to the stress management programme and because the participants  
48 will be accompanied by healthcare professionals, the adherence to treatment during a one-year follow-  
49 up could be more efficient. In order to avoid any generalisability of our expected results, we will pay  
50 particular attention at the demographics of the participants included (particularly between participants  
51  
52  
53  
54  
55  
56  
57  
58  
59  
60

1  
2  
3 recruited from the “usual spa clients” and other participants). Secondary and sensitivity analyses will  
4  
5 take into account where the participants were recruited.  
6  
7  
8

### 9 10 **Current study status**

11 The trial is currently recruiting participants.  
12  
13  
14

### 15 16 **Funding**

17  
18 The study is integrally funded by the Auvergne Rhône-Alpes, the University Hospital of Clermont-  
19  
20 Ferrand and by the European Regional Development Fund (FEDER, Fonds Europeen de Développement  
21  
22 Economique et Régional). The funding sources had no role in the design, conduct, or reporting of the  
23  
24 study.  
25  
26  
27

### 28 29 **Competing interests**

30 The authors declare that they have no competing interests.  
31  
32  
33

### 34 35 **Author’s contributions**

36  
37 FD contributed to the study design. FD was responsible for the submission of the protocol to the ethics  
38  
39 committee. FD and AV will coordinate the recruitment of patients. DC, EC and PD will be responsible  
40  
41 for bone measurements. AA will be responsible for liver-related factors. DP and SH will be responsible  
42  
43 for psychosocial analysis. LM and MM will be responsible for mindfulness, psychological education  
44  
45 and cognitive-compartmental therapy analysis. GV will be responsible for the analysis of memory-  
46  
47 related data. PO, OI and GB will be responsible for cardiovascular measurements. YB, NF and MMD  
48  
49 will be responsible for nutritional measurements and analysis. DC, EC and PD will be responsible for  
50  
51 physical activity analysis. AV will be responsible for the collection of psychological factors. BP is  
52  
53 responsible for the statistical analysis. EC is responsible for the clinical trial and wrote the first draft of  
54  
55 this manuscript. All authors read, contributed towards and approved the final manuscript.  
56  
57  
58  
59

### 60 **Acknowledgement**

We authors wish to thank Richard May for his attentive editing of the manuscript. The authors also wish to thanks Ms Isabelle Jourde and Janine Lauradoux for their future management of biological sampling and Sarah De Saint Vincent for biological analysis. Moreover, we want to thank you Ms Anne-Cecile Fournier, Christine Flouzat and Marie-Anne Cousseau for their commitment to setting up the program.

## References

1. Quine L. Workplace bullying in NHS community trust: staff questionnaire survey. *BMJ* 1999;318(7178):228-32. [published Online First: 1999/01/23]
2. Dutheil F, Lac G, Lesourd B, et al. Different modalities of exercise to reduce visceral fat mass and cardiovascular risk in metabolic syndrome: the RESOLVE randomized trial. *Int J Cardiol* 2013;168(4):3634-42. doi: 10.1016/j.ijcard.2013.05.012 [published Online First: 2013/05/30]
3. Foss B, Dyrstad SM. Stress in obesity: cause or consequence? *Med Hypotheses* 2011;77(1):7-10. doi: 10.1016/j.mehy.2011.03.011 [published Online First: 2011/03/30]
4. Sinha R, Jastreboff AM. Stress as a Common Risk Factor for Obesity and Addiction. *Biol Psychiatry* 2013;73(9):827-35. doi: 10.1016/j.biopsych.2013.01.032 [published Online First: 2013/04/02]
5. Robinson E, Hunger JM, Daly M. Perceived weight status and risk of weight gain across life in US and UK adults. *Int J Obes (Lond)* 2015;39(12):1721-26. doi: 10.1038/ijo.2015.143 [published Online First: 2015/08/08]
6. Haleem DJ. Investigations into the involvement of leptin in responses to stress. *Behav Pharmacol* 2014;25(5-6):384-97. doi: 10.1097/fbp.000000000000050 [published Online First: 2014/07/23]
7. Schellekens H, Finger BC, Dinan TG, et al. Ghrelin signalling and obesity: at the interface of stress, mood and food reward. *Pharmacol Ther* 2012;135(3):316-26. doi: 10.1016/j.pharmthera.2012.06.004 [published Online First: 2012/07/04]
8. Isasi CR, Parrinello CM, Jung MM, et al. Psychosocial stress is associated with obesity and diet quality in Hispanic/Latino adults. *Ann Epidemiol* 2015;25(2):84-9. doi: 10.1016/j.annepidem.2014.11.002 [published Online First: 2014/12/10]
9. Backe EM, Seidler A, Latza U, et al. The role of psychosocial stress at work for the development of cardiovascular diseases: a systematic review. *Int Arch Occup Environ Health* 2012;85(1):67-79. doi: 10.1007/s00420-011-0643-6 [published Online First: 2011/05/18]
10. Dutheil F, Boudet G, Perrier C, et al. JOBSTRESS study: comparison of heart rate variability in emergency physicians working a 24-hour shift or a 14-hour night shift - a randomized trial. *Int J Cardiol* 2012;158(2):322-5. doi: 10.1016/j.ijcard.2012.04.141 [published Online First: 2012/05/23]
11. Karason K, Molgaard H, Wikstrand J, et al. Heart rate variability in obesity and the effect of weight loss. *Am J Cardiol* 1999;83(8):1242-7.
12. Chintala KK, Krishna BH, N MR. Heart rate variability in overweight health care students: correlation with visceral fat. *J Clin Diagn Res* 2015;9(1):1.
13. Tsuji H, Larson MG, Venditti FJ, Jr., et al. Impact of reduced heart rate variability on risk for cardiac events. The Framingham Heart Study. *Circulation* 1996;94(11):2850-5.
14. Boudet G, Walther G, Courteix D, et al. Paradoxical dissociation between heart rate and heart rate variability following different modalities of exercise in individuals with metabolic syndrome: The RESOLVE study. *European journal of preventive cardiology* 2017;24(3):281-96. doi: 10.1177/2047487316679523 [published Online First: 2016/11/20]
15. Hufnagel C, Chambres P, Bertrand PR, et al. The Need for Objective Measures of Stress in Autism. *Frontiers in psychology* 2017;8(64) doi: 10.3389/fpsyg.2017.00064

16. Proietti R, Mapelli D, Volpe B, et al. Mental stress and ischemic heart disease: evolving awareness of a complex association. *Future Cardiol* 2011;7(3):425-37. doi: 10.2217/fca.11.13 [published Online First: 2011/06/02]
17. Elenkov IJ, Iezzoni DG, Daly A, et al. Cytokine dysregulation, inflammation and well-being. *Neuroimmunomodulation* 2005;12(5):255-69. doi: 10.1159/000087104 [published Online First: 2005/09/17]
18. Dutheil F, Lesourd B, Courteix D, et al. Blood lipids and adipokines concentrations during a 6-month nutritional and physical activity intervention for metabolic syndrome treatment. *Lipids Health Dis* 2010;9:148. doi: 10.1186/1476-511x-9-148 [published Online First: 2011/01/05]
19. Bloom L, Shelton B, Bengough M, et al. Psychosocial outcomes of a non-dieting based positive body image community program for overweight adults: a pilot study. *J Eat Disord* 2013;1:44. doi: 10.1186/2050-2974-1-44 [published Online First: 2013/01/01]
20. Waysfeld B. [Psychological approaches to the obese]. *Presse Med* 2000;29(10):556-63. [published Online First: 2000/04/13]
21. van der Klink JJ, Blonk RW, Schene AH, et al. The benefits of interventions for work-related stress. *American Journal of Public Health* 2001;91(2):270-6. [published Online First: 2001/02/24]
22. Banz WJ, Maher MA, Thompson WG, et al. Effects of resistance versus aerobic training on coronary artery disease risk factors. *Exp Biol Med (Maywood)* 2003;228(4):434-40. [published Online First: 2003/04/03]
23. Brinkborg H, Michanek J, Hesser H, et al. Acceptance and commitment therapy for the treatment of stress among social workers: a randomized controlled trial. *Behaviour Research and Therapy* 2011;49(6-7):389-98. doi: 10.1016/j.brat.2011.03.009 [published Online First: 2011/04/26]
24. Davies WR. Mindful meditation: healing burnout in critical care nursing. *Holist Nurs Pract* 2008;22(1):32-6. doi: 10.1097/01.hnp.0000306326.56955.14 [published Online First: 2008/01/04]
25. Cohen-Katz J, Wiley SD, Capuano T, et al. The effects of mindfulness-based stress reduction on nurse stress and burnout: a quantitative and qualitative study. *Holist Nurs Pract* 2004;18(6):302-8. [published Online First: 2004/12/31]
26. Stults-Kolehmainen MA, Sinha R. The effects of stress on physical activity and exercise. *Sports Med* 2014;44(1):81-121. doi: 10.1007/s40279-013-0090-5 [published Online First: 2013/09/14]
27. Hansen AM, Blangsted AK, Hansen EA, et al. Physical activity, job demand-control, perceived stress-energy, and salivary cortisol in white-collar workers. *Int Arch Occup Environ Health* 2010;83(2):143-53. doi: 10.1007/s00420-009-0440-7 [published Online First: 2009/08/12]
28. Kiecolt-Glaser JK. Stress, food, and inflammation: psychoneuroimmunology and nutrition at the cutting edge. *Psychosomatic medicine* 2010;72(4):365.
29. Bhui KS, Dinos S, Stansfeld SA, et al. A synthesis of the evidence for managing stress at work: a review of the reviews reporting on anxiety, depression, and absenteeism. *J Environ Public Health* 2012;2012:515874. doi: 10.1155/2012/515874 [published Online First: 2012/04/13]
30. Elghozi JL, Girard A, Laude D. Effects of drugs on the autonomic control of short-term heart rate variability. *Auton Neurosci* 2001;90(1-2):116-21. doi: 10.1016/s1566-0702(01)00276-4 [published Online First: 2001/08/04]
31. Bond FW, Bunce D. The role of acceptance and job control in mental health, job satisfaction, and work performance. *J Appl Psychol* 2003;88(6):1057-67. doi: 10.1037/0021-9010.88.6.1057 [published Online First: 2003/12/04]
32. Tochikubo O, Ikeda A, Miyajima E, et al. Effects of insufficient sleep on blood pressure monitored by a new multibiomedical recorder. *Hypertension* 1996;27(6):1318-24. [published Online First: 1996/06/01]
33. Khalfa N, Bertrand PR, Boudet G, et al. Heart rate regulation processed through wavelet analysis and change detection: some case studies. *Acta Biotheor* 2012;60(1-2):109-29. doi: 10.1007/s10441-012-9154-4 [published Online First: 2012/04/27]
34. Obesity: preventing and managing the global epidemic. Report of a WHO consultation. *World Health Organ Tech Rep Ser* 2000;894:i-xii, 1-253. [published Online First: 2001/03/10]



- 1
  - 2
  - 3
  - 4
  - 5
  - 6
  - 7
  - 8
  - 9
  - 10
  - 11
  - 12
  - 13
  - 14
  - 15
  - 16
  - 17
  - 18
  - 19
  - 20
  - 21
  - 22
  - 23
  - 24
  - 25
  - 26
  - 27
  - 28
  - 29
  - 30
  - 31
  - 32
  - 33
  - 34
  - 35
  - 36
  - 37
  - 38
  - 39
  - 40
  - 41
  - 42
  - 43
  - 44
  - 45
  - 46
  - 47
  - 48
  - 49
  - 50
  - 51
  - 52
  - 53
  - 54
  - 55
  - 56
  - 57
  - 58
  - 59
  - 60
35. Courteix D, Valente-Dos-Santos J, Ferry B, et al. Multilevel Approach of a 1-Year Program of Dietary and Exercise Interventions on Bone Mineral Content and Density in Metabolic Syndrome - the RESOLVE Randomized Controlled Trial. *PLoS One* 2015;10(9):e0136491. doi: 10.1371/journal.pone.0136491 [published Online First: 2015/09/17]
36. Pateyjohns IR, Brinkworth GD, Buckley JD, et al. Comparison of three bioelectrical impedance methods with DXA in overweight and obese men. *Obesity (Silver Spring)* 2006;14(11):2064-70. doi: 10.1038/oby.2006.241 [published Online First: 2006/12/01]
37. Dutheil F, Chambres P, Hufnagel C, et al. 'Do Well B.': Design Of WELL Being monitoring systems. A study protocol for the application in autism. *BMJ Open* 2015;5(2):e007716. doi: 10.1136/bmjopen-2015-007716 [published Online First: 2015/02/25]
38. Lang RM, Badano LP, Mor-Avi V, et al. Recommendations for cardiac chamber quantification by echocardiography in adults: an update from the American Society of Echocardiography and the European Association of Cardiovascular Imaging. *Journal of the American Society of Echocardiography* 2015;28(1):1-39. e14.
39. Mor-Avi V, Lang RM, Badano LP, et al. Current and evolving echocardiographic techniques for the quantitative evaluation of cardiac mechanics: ASE/EAE consensus statement on methodology and indications: endorsed by the Japanese Society of Echocardiography. *Journal of the American Society of Echocardiography* 2011;24(3):277-313.
40. Nagueh SF, Smiseth OA, Appleton CP, et al. Recommendations for the Evaluation of Left Ventricular Diastolic Function by Echocardiography: An Update from the American Society of Echocardiography and the European Association of Cardiovascular Imaging. *European heart journal cardiovascular Imaging* 2016;17(12):1321-60. doi: 10.1093/ehjci/jew082 [published Online First: 2016/07/17]
41. Buss J, Havel PJ, Epel E, et al. Associations of ghrelin with eating behaviors, stress, metabolic factors, and telomere length among overweight and obese women: preliminary evidence of attenuated ghrelin effects in obesity? *Appetite* 2014;76:84-94. doi: 10.1016/j.appet.2014.01.011 [published Online First: 2014/01/28]
42. Karege F, Perret G, Bondolfi G, et al. Decreased serum brain-derived neurotrophic factor levels in major depressed patients. *Psychiatry Res* 2002;109(2):143-8. [published Online First: 2002/04/03]
43. Karege F, Bondolfi G, Gervasoni N, et al. Low brain-derived neurotrophic factor (BDNF) levels in serum of depressed patients probably results from lowered platelet BDNF release unrelated to platelet reactivity. *Biol Psychiatry* 2005;57(9):1068-72. doi: 10.1016/j.biopsych.2005.01.008 [published Online First: 2005/04/30]
44. Shimizu E, Hashimoto K, Okamura N, et al. Alterations of serum levels of brain-derived neurotrophic factor (BDNF) in depressed patients with or without antidepressants. *Biol Psychiatry* 2003;54(1):70-5. [published Online First: 2003/07/05]
45. Krystal JH, Neumeister A. Noradrenergic and serotonergic mechanisms in the neurobiology of posttraumatic stress disorder and resilience. *Brain Res* 2009;1293:13-23. doi: 10.1016/j.brainres.2009.03.044 [published Online First: 2009/04/01]
46. Lac G, Dutheil F, Brousse G, et al. Saliva DHEAS changes in patients suffering from psychopathological disorders arising from bullying at work. *Brain Cogn* 2012;80(2):277-81. doi: 10.1016/j.bandc.2012.07.007 [published Online First: 2012/09/04]
47. Danhof-Pont MB, van Veen T, Zitman FG. Biomarkers in burnout: a systematic review. *J Psychosom Res* 2011;70(6):505-24. doi: 10.1016/j.jpsychores.2010.10.012 [published Online First: 2011/06/01]
48. Montgomery H, Clarkson P, Barnard M, et al. Angiotensin-converting-enzyme gene insertion/deletion polymorphism and response to physical training. *Lancet* 1999;353(9152):541-5. doi: 10.1016/s0140-6736(98)07131-1 [published Online First: 1999/02/24]

- 1  
2  
3 49. Henrion D, Benessiano J, Philip I, et al. The deletion genotype of the angiotensin I-converting  
4 enzyme is associated with an increased vascular reactivity in vivo and in vitro. *J Am Coll Cardiol*  
5 1999;34(3):830-6. [published Online First: 1999/09/14]  
6  
7 50. Gard PR. The role of angiotensin II in cognition and behaviour. *Eur J Pharmacol* 2002;438(1-2):1-  
8 14. [published Online First: 2002/03/22]  
9  
10 51. Thayer JF, Merritt MM, Sollers JJ, 3rd, et al. Effect of angiotensin-converting enzyme  
11 insertion/deletion polymorphism DD genotype on high-frequency heart rate variability in  
12 African Americans. *Am J Cardiol* 2003;92(12):1487-90. [published Online First: 2003/12/17]  
13  
14 52. Hariri AR, Drabant EM, Weinberger DR. Imaging genetics: perspectives from studies of genetically  
15 driven variation in serotonin function and corticolimbic affective processing. *Biol Psychiatry*  
16 2006;59(10):888-97. doi: 10.1016/j.biopsych.2005.11.005 [published Online First:  
17 2006/01/31]  
18  
19 53. Hariri AR, Weinberger DR. Functional neuroimaging of genetic variation in serotonergic  
20 neurotransmission. *Genes Brain Behav* 2003;2(6):341-9. [published Online First: 2003/12/05]  
21  
22 54. McCaffery JM, Bleil M, Pogue-Geile MF, et al. Allelic variation in the serotonin transporter gene-  
23 linked polymorphic region (5-HTTLPR) and cardiovascular reactivity in young adult male and  
24 female twins of European-American descent. *Psychosom Med* 2003;65(5):721-8. [published  
25 Online First: 2003/09/26]  
26  
27 55. Epel ES, Blackburn EH, Lin J, et al. Accelerated telomere shortening in response to life stress. *Proc*  
28 *Natl Acad Sci U S A* 2004;101(49):17312-5. doi: 10.1073/pnas.0407162101 [published Online  
29 First: 2004/12/03]  
30  
31 56. Choron G, Dutheil F, Lesage FX. Are nurses burned out? *Int J Nurs Stud* 2016;58:80-1. doi:  
32 10.1016/j.ijnurstu.2016.02.002 [published Online First: 2016/04/19]  
33  
34 57. Hung CI, Liu CY, Wang SJ, et al. The cut-off points of the Depression and Somatic Symptoms Scale  
35 and the Hospital Anxiety and Depression Scale in detecting non-full remission and a current  
36 major depressive episode. *Int J Psychiatry Clin Pract* 2012;16(1):33-40. doi:  
37 10.3109/13651501.2011.617456 [published Online First: 2011/11/30]  
38  
39 58. Julian LJ. Measures of anxiety: State-Trait Anxiety Inventory (STAI), Beck Anxiety Inventory (BAI),  
40 and Hospital Anxiety and Depression Scale-Anxiety (HADS-A). *Arthritis Care Res (Hoboken)*  
41 2011;63 Suppl 11:S467-72. doi: 10.1002/acr.20561 [published Online First: 2012/05/25]  
42  
43 59. Spiess K, Sachs G, Moser G, et al. Psychological moderator variables and metabolic control in recent  
44 onset type 1 diabetic patients--a two year longitudinal study. *J Psychosom Res* 1994;38(3):249-  
45 58. [published Online First: 1994/04/01]  
46  
47 60. Endler NS, Parker JD. Multidimensional assessment of coping: a critical evaluation. *J Pers Soc*  
48 *Psychol* 1990;58(5):844-54. [published Online First: 1990/05/01]  
49  
50 61. Ioannidis CA, Siegling AB. Criterion and incremental validity of the emotion regulation  
51 questionnaire. *Frontiers in psychology* 2015;6:247. doi: 10.3389/fpsyg.2015.00247 [published  
52 Online First: 2015/03/31]  
53  
54 62. Lesage FX, Choron G, Dutheil F. Multifaceted Program to Reduce Job Strain in ICU Nurses. *JAMA*  
55 2019;321(14):1410-11. doi: 10.1001/jama.2019.0570 [published Online First: 2019/04/10]  
56  
57 63. Trousselard M, Dutheil F, Naughton G, et al. Stress among nurses working in emergency,  
58 anesthesiology and intensive care units depends on qualification: a Job Demand-Control  
59 survey. *Int Arch Occup Environ Health* 2016;89(2):221-9. doi: 10.1007/s00420-015-1065-7  
60 [published Online First: 2015/06/27]  
61  
62 64. Luszczynska A, Scholz U, Schwarzer R. The general self-efficacy scale: multicultural validation  
63 studies. *J Psychol* 2005;139(5):439-57. doi: 10.3200/jrlp.139.5.439-457 [published Online First:  
64 2005/11/16]  
65  
66 65. Li S, Zhang B, Guo Y, et al. The association between alexithymia as assessed by the 20-item Toronto  
67 Alexithymia Scale and depression: A meta-analysis. *Psychiatry Res* 2015;227(1):1-9. doi:  
68 10.1016/j.psychres.2015.02.006 [published Online First: 2015/03/15]

- 1
- 2
- 3
- 4 66. Bagby RM, Parker JD, Taylor GJ. The twenty-item Toronto Alexithymia Scale--I. Item selection and
- 5 cross-validation of the factor structure. *J Psychosom Res* 1994;38(1):23-32. [published Online
- 6 First: 1994/01/01]
- 7 67. Bagby RM, Taylor GJ, Parker JD. The Twenty-item Toronto Alexithymia Scale--II. Convergent,
- 8 discriminant, and concurrent validity. *J Psychosom Res* 1994;38(1):33-40. [published Online
- 9 First: 1994/01/01]
- 10 68. Broadbent E, Petrie KJ, Main J, et al. The brief illness perception questionnaire. *J Psychosom Res*
- 11 2006;60(6):631-7. doi: 10.1016/j.jpsychores.2005.10.020 [published Online First: 2006/05/30]
- 12 69. Broadbent E, Wilkes C, Koschwanez H, et al. A systematic review and meta-analysis of the Brief
- 13 Illness Perception Questionnaire. *Psychology & health* 2015;30(11):1361-85. doi:
- 14 10.1080/08870446.2015.1070851 [published Online First: 2015/07/17]
- 15 70. Wells A, Cartwright-Hatton S. A short form of the metacognitions questionnaire: properties of the
- 16 MCQ-30. *Behav Res Ther* 2004;42(4):385-96. doi: 10.1016/s0005-7967(03)00147-5 [published
- 17 Online First: 2004/03/05]
- 18 71. Amiel R, Lebigre F. [A new rapid test for the evaluation of mental health. Its use for early detections.
- 19 Its importance in health surveys]. *Ann Med Psychol (Paris)* 1970;1(4):565-80. [published Online
- 20 First: 1970/04/01]
- 21 72. Golubic R, May AM, Benjaminsen Borch K, et al. Validity of electronically administered Recent
- 22 Physical Activity Questionnaire (RPAQ) in ten European countries. *PLoS One* 2014;9(3):e92829.
- 23 doi: 10.1371/journal.pone.0092829 [published Online First: 2014/03/29]
- 24 73. Sornay-Rendu E, Boutroy S, Munoz F, et al. Cortical and trabecular architecture are altered in
- 25 postmenopausal women with fractures. *Osteoporos Int* 2009;20(8):1291-7. doi:
- 26 10.1007/s00198-009-1008-9 [published Online First: 2009/07/11]
- 27 74. Boutroy S, Bouxsein ML, Munoz F, et al. In vivo assessment of trabecular bone microarchitecture
- 28 by high-resolution peripheral quantitative computed tomography. *J Clin Endocrinol Metab*
- 29 2005;90(12):6508-15. doi: 10.1210/jc.2005-1258 [published Online First: 2005/09/29]
- 30 75. Stein EM, Liu XS, Nickolas TL, et al. Abnormal microarchitecture and reduced stiffness at the radius
- 31 and tibia in postmenopausal women with fractures. *J Bone Miner Res* 2010;25(12):2572-81.
- 32 doi: 10.1002/jbmr.152 [published Online First: 2010/06/22]
- 33 76. Kullback S. Information theory and statistics. New York: John Wiley & Sons 1959.
- 34 77. Steiger JH. Tests for comparing elements of a correlation matrix. *Psychol Bull* 1980;87:245-51.
- 35 78. Vickers AJ, Altman DG. Statistics notes: Analysing controlled trials with baseline and follow up
- 36 measurements. *BMJ* 2001;323(7321):1123-4. doi: 10.1136/bmj.323.7321.1123 [published
- 37 Online First: 2001/11/10]
- 38 79. Damilakis J, Adams JE, Guglielmi G, et al. Radiation exposure in X-ray-based imaging techniques
- 39 used in osteoporosis. *Eur Radiol* 2010;20(11):2707-14. doi: 10.1007/s00330-010-1845-0
- 40 [published Online First: 2010/06/19]
- 41 80. Fappa E, Yannakoulia M, Pitsavos C, et al. Lifestyle intervention in the management of metabolic
- 42 syndrome: could we improve adherence issues? *Nutrition* 2008;24(3):286-91. doi:
- 43 10.1016/j.nut.2007.11.008 [published Online First: 2008/01/19]
- 44 81. Eleftheriou F, Ahn JD, Takeda S, et al. Leptin regulation of bone resorption by the sympathetic
- 45 nervous system and CART. *Nature* 2005;434(7032):514-20. doi: 10.1038/nature03398
- 46 [published Online First: 2005/02/23]
- 47 82. Puissant C, Abraham P, Durand S, et al. Reproducibility of non-invasive assessment of skin
- 48 endothelial function using laser Doppler flowmetry and laser speckle contrast imaging. *PLoS*
- 49 *One* 2013;8(4):e61320. doi: 10.1371/journal.pone.0061320 [published Online First:
- 50 2013/04/27]
- 51 83. Souza EG, De Lorenzo A, Huguenin G, et al. Impairment of systemic microvascular endothelial and
- 52 smooth muscle function in individuals with early-onset coronary artery disease: studies with
- 53 laser speckle contrast imaging. *Coron Artery Dis* 2014;25(1):23-8.
- 54 84. Wu C, Gluer C, Lu Y, et al. Ultrasound characterization of bone demineralization. *Calcif Tissue Int*
- 55 1998;62(2):133-9. [published Online First: 1998/02/14]
- 56
- 57
- 58
- 59
- 60

- 1  
2  
3 85. Bussing A, Fischer J, Haller A, et al. Validation of the brief multidimensional life satisfaction scale in  
4 patients with chronic diseases. *Eur J Med Res* 2009;14(4):171-7. [published Online First:  
5 2009/04/22]  
6  
7 86. Bussing A, Edelhauser F, Weisskircher A, et al. Inner Correspondence and Peacefulness with  
8 Practices among Participants in Eurythmy Therapy and Yoga: A Validation Study. *Evid Based*  
9 *Complement Alternat Med* 2011;2011 doi: 10.1155/2011/329023 [published Online First:  
10 2010/10/19]  
11  
12  
13  
14  
15  
16  
17  
18  
19  
20  
21  
22  
23  
24  
25  
26  
27  
28  
29  
30  
31  
32  
33  
34  
35  
36  
37  
38  
39  
40  
41  
42  
43  
44  
45  
46  
47  
48  
49  
50  
51  
52  
53  
54  
55  
56  
57  
58  
59  
60

For peer review only

**Table 1.** Outcomes

| Variables                                 | Type of Measurements                                                                      | Modalities of measurement                                              | References |
|-------------------------------------------|-------------------------------------------------------------------------------------------|------------------------------------------------------------------------|------------|
| Stress and cardiovascular risk biomarkers | Heart rate variability                                                                    | Holter                                                                 | 81         |
|                                           | Skin conductance                                                                          | Wristband electrodes – Movisens                                        | 37         |
|                                           | Blood flow velocity                                                                       | Laser speckle contrast imaging (LSCI)                                  | 82-83      |
|                                           | Myocardial longitudinal strain                                                            | Speckle tracking echocardiography (STE)                                | 38-39      |
| Genetic polymorphisms                     | Polymorphism of the angiotensin converting enzyme                                         | Blood cells                                                            | 48-51      |
|                                           | Polymorphism of the serotonin                                                             | Blood cells                                                            | 52-54      |
| Demographics* (* Adjustment variables)    | Age, gender, qualification, personal work status, ethnicity, life and occupational events | Questionnaire                                                          | 10         |
| Clinical measurements                     |                                                                                           | Height, weight, blood pressure, heart rate, waist circumference        |            |
| Body composition                          | Muscle mass, fat mass, bone structure                                                     | Impedance meter                                                        | 36         |
|                                           |                                                                                           | Densitometry X-ray absorption                                          | 35         |
|                                           |                                                                                           | Peripheral quantitative computed tomography (pQCT)                     | 73-75      |
|                                           |                                                                                           | Quantitative ultrasounds (QUS)                                         | 84         |
| Psychology and quality of life            | Depression                                                                                | HAD (7 items)                                                          | 57         |
|                                           | Anxiety                                                                                   | HAD (7 items)                                                          | 57         |
|                                           |                                                                                           | Hamilton scale for anxiety (7-item)                                    |            |
|                                           |                                                                                           | State and Trait Anxiety Inventory (STAI)                               | 58-59      |
|                                           | General health                                                                            | General health questionnaire SF-36 (36 items)                          | 71         |
|                                           | Quality of life                                                                           | Brief Multidimensional Life Satisfaction Scale (11 items)              | 85         |
|                                           | Stress, fatigue, sleep                                                                    | 100 mm Visual analog scale                                             | 10         |
|                                           | Burnout                                                                                   | Maslach Burnout Inventory                                              | 56         |
|                                           | Mindfulness                                                                               | Mindfulness Fribourg Mindfulness Inventory                             | 22,23      |
|                                           | Coping                                                                                    | Brief COPE questionnaire (BCQ)                                         | 60         |
|                                           | Emotions                                                                                  | Emotion Regulation Questionnaire (ERQ)                                 | 61         |
|                                           | Perception of work                                                                        | Karasek's Job Content Questionnaire                                    | 63         |
|                                           | Self-efficacy                                                                             | Perceived self-efficacy scale                                          | 64         |
|                                           | Alexithymia                                                                               | Toronto Alexithymia Scale (TAS-20)                                     | 65-67      |
| Illness Perception                        | Brief Illness Perception Questionnaire (B-IPQ)                                            | 68-69                                                                  |            |
| Metacognition                             | MetaCognition Questionnaire (MCQ-30)                                                      | 70                                                                     |            |
| Personal resources                        | Trait perception of workplace stress                                                      | Inner Correspondence/Peaceful Harmony with practices (ICPH) (17 items) | 86         |
| Lifestyle                                 | Smoking, alcohol, coffee, food intake, etc.                                               | Questionnaires                                                         | 10         |
|                                           | Physical activity                                                                         | Recent Physical Activity Questionnaire (RPAQ)                          | 72         |
| Alloplastic load                          | HbA1c, HDLc and LDL cholesterol, TG                                                       | EDTA tube                                                              | 35         |

|  |                                                                     |                                             |       |
|--|---------------------------------------------------------------------|---------------------------------------------|-------|
|  | Cortisol                                                            | Dry tube, serum isolation and deep-freezing | 46 47 |
|  | DHEAS                                                               | Dry tube, serum isolation and deep-freezing | 46 47 |
|  | Leptin                                                              | Dry tube, serum isolation and deep-freezing | 35    |
|  | Ghrelin                                                             | Dry tube, serum isolation and deep-freezing | 7 41  |
|  | BDNF                                                                | Dry tube, serum isolation and deep-freezing | 42-44 |
|  | Pro-inflammatory Cytokines: IL-1 $\beta$ , IL-6, IL-1, TNF $\alpha$ | Dry tube, serum isolation and deep-freezing | 35    |
|  | NPY                                                                 | Dry tube, serum isolation and deep-freezing | 45    |
|  | Telomere length                                                     | Blood; analysis by southern blot or PCR     | 55    |

1  
2  
3 **Figure Title:** ObestiStress protocol  
4

5 **Figure Abbreviation:** M months, D days  
6  
7

8  
9 **Supplementary files:**  
10

11 S1 - TIDieR checklist  
12

13 S2 - patient consent form  
14  
15  
16  
17  
18  
19  
20  
21  
22  
23  
24  
25  
26  
27  
28  
29  
30  
31  
32  
33  
34  
35  
36  
37  
38  
39  
40  
41  
42  
43  
44  
45  
46  
47  
48  
49  
50  
51  
52  
53  
54  
55  
56  
57  
58  
59  
60

For peer review only

1  
2  
3  
4  
5  
6  
7  
8  
9  
10  
11  
12  
13  
14  
15  
16  
17  
18  
19  
20  
21  
22  
23  
24  
25  
26  
27  
28  
29  
30  
31  
32  
33  
34  
35  
36  
37  
38  
39  
40  
41  
42  
43  
44  
45  
46  
47  
48  
49  
50  
51  
52  
53  
54  
55  
56  
57  
58  
59  
60

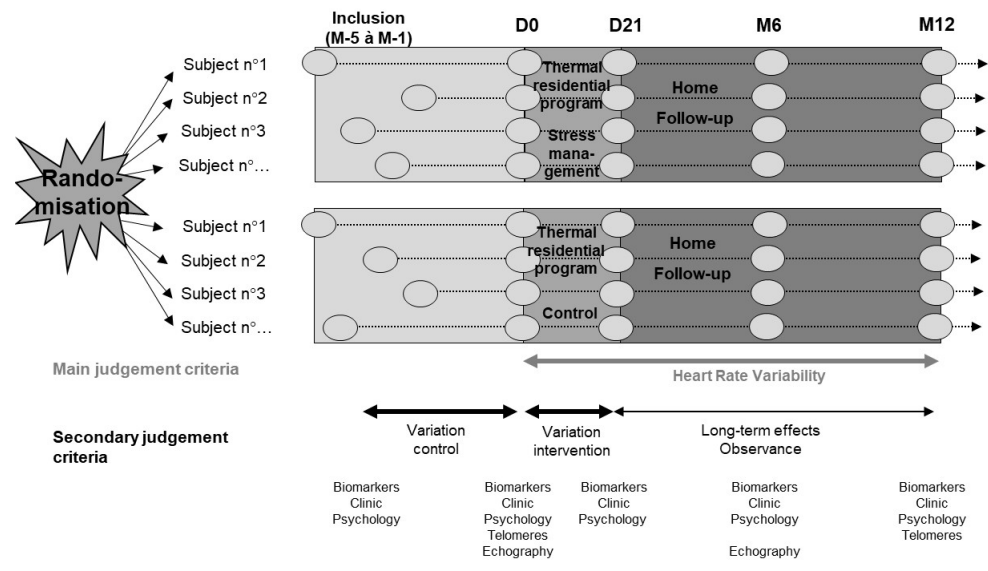

Title: The ObesiStress protocol  
M months, D day

105x59mm (300 x 300 DPI)



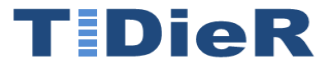

Template for Intervention  
Description and Replication

## The TIDieR (Template for Intervention Description and Replication) Checklist\*:

Information to include when describing an intervention and the location of the information

| Item<br>number | Item                                                                                                                                                                                                                                                                                                 | Where located **                              |                   |
|----------------|------------------------------------------------------------------------------------------------------------------------------------------------------------------------------------------------------------------------------------------------------------------------------------------------------|-----------------------------------------------|-------------------|
|                |                                                                                                                                                                                                                                                                                                      | Primary paper<br>(page or appendix<br>number) | Other † (details) |
|                | <b>BRIEF NAME</b>                                                                                                                                                                                                                                                                                    |                                               |                   |
| 1.             | Provide the name or a phrase that describes the intervention.                                                                                                                                                                                                                                        | ___ 1 ___                                     | _____             |
|                | <b>WHY</b>                                                                                                                                                                                                                                                                                           |                                               |                   |
| 2.             | Describe any rationale, theory, or goal of the elements essential to the intervention.                                                                                                                                                                                                               | ___ 5 ___                                     | _____             |
|                | <b>WHAT</b>                                                                                                                                                                                                                                                                                          |                                               |                   |
| 3.             | Materials: Describe any physical or informational materials used in the intervention, including those provided to participants or used in intervention delivery or in training of intervention providers.<br>Provide information on where the materials can be accessed (e.g. online appendix, URL). | ___ 6-14 ___                                  | _____             |
| 4.             | Procedures: Describe each of the procedures, activities, and/or processes used in the intervention, including any enabling or support activities.                                                                                                                                                    | ___ 6-14 ___                                  | _____             |
|                | <b>WHO PROVIDED</b>                                                                                                                                                                                                                                                                                  |                                               |                   |
| 5.             | For each category of intervention provider (e.g. psychologist, nursing assistant), describe their expertise, background and any specific training given.                                                                                                                                             | ___ N/A ___                                   | _____             |
|                | <b>HOW</b>                                                                                                                                                                                                                                                                                           |                                               |                   |
| 6.             | Describe the modes of delivery (e.g. face-to-face or by some other mechanism, such as internet or telephone) of the intervention and whether it was provided individually or in a group.                                                                                                             | ___ 8 ___                                     | _____             |
|                | <b>WHERE</b>                                                                                                                                                                                                                                                                                         |                                               |                   |
| 7.             | Describe the type(s) of location(s) where the intervention occurred, including any necessary infrastructure or relevant features.                                                                                                                                                                    | ___ 8 ___                                     | _____             |

1  
2  
3  
4  
5  
6  
7  
8  
9  
10  
11  
12  
13  
14  
15  
16  
17  
18  
19  
20  
21  
22  
23  
24  
25  
26  
27  
28  
29  
30  
31  
32  
33  
34  
35  
36  
37  
38  
39  
40  
41  
42  
43  
44  
45  
46

**WHEN and HOW MUCH**

8. Describe the number of times the intervention was delivered and over what period of time including the number of sessions, their schedule, and their duration, intensity or dose. 6/8

**TAILORING**

9. If the intervention was planned to be personalised, titrated or adapted, then describe what, why, when, and how. n/a

**MODIFICATIONS**

10.\* If the intervention was modified during the course of the study, describe the changes (what, why, when, and how). n/a

**HOW WELL**

11. Planned: If intervention adherence or fidelity was assessed, describe how and by whom, and if any strategies were used to maintain or improve fidelity, describe them. 12

12.\* Actual: If intervention adherence or fidelity was assessed, describe the extent to which the intervention was delivered as planned.

\*\* **Authors** - use N/A if an item is not applicable for the intervention being described. **Reviewers** – use ‘?’ if information about the element is not reported/not sufficiently reported.

† If the information is not provided in the primary paper, give details of where this information is available. This may include locations such as a published protocol or other published papers (provide citation details) or a website (provide the URL).

‡ If completing the TIDieR checklist for a protocol, these items are not relevant to the protocol and cannot be described until the study is complete.

\* We strongly recommend using this checklist in conjunction with the TIDieR guide (see *BMJ* 2014;348:g1687) which contains an explanation and elaboration for each item.

\* The focus of TIDieR is on reporting details of the intervention elements (and where relevant, comparison elements) of a study. Other elements and methodological features of studies are covered by other reporting statements and checklists and have not been duplicated as part of the TIDieR checklist. When a **randomised trial** is being reported, the TIDieR checklist should be used in conjunction with the CONSORT statement (see [www.consort-statement.org](http://www.consort-statement.org)) as an extension of **Item 5 of the CONSORT 2010 Statement**. When a **clinical trial protocol** is being reported, the TIDieR checklist should be used in conjunction with the SPIRIT statement as an extension of **Item 11 of the SPIRIT 2013 Statement** (see [www.spirit-statement.org](http://www.spirit-statement.org)). For alternate study designs, TIDieR can be used in conjunction with the appropriate checklist for that study design (see [www.equator-network.org](http://www.equator-network.org)).

## Formulaire de consentement

Titre de l'étude : **Obesi-Stress**

Coordinateur et Investigateur principal : Dr Frédéric Dutheil

Promoteur : **CHU Clermont-Ferrand**, 58 Rue de Montalembert, 63000 Clermont-Ferrand, France

Je soussigné(e)

M<sup>me</sup>, M. (*ayer les mentions inutiles*) (*nom, prénom*) .....

Né(e) le .....

Demeurant .....

Déclare :

- que le Docteur (nom, prénom, tel) ..... m'a proposé de participer à l'étude sus nommée,
- qu'il m'a expliqué en détail le protocole,
- qu'il m'a notamment fait connaître :
  - l'objectif, la méthode et la durée de l'étude
  - les contraintes et les risques potentiels encourus
  - mon droit de refuser de participer et en cas de désaccord de retirer mon consentement à tout moment
  - mon obligation d'inscription à un régime de sécurité sociale
  - que, si je le souhaite, à son terme, je serais informé(e) par le médecin investigateur de ses résultats globaux
  - que le Comité de Protection des Personnes Sud-Est VI a émis un avis favorable en date du 25/01/2018
  - que l'ANSM a délivré une autorisation pour cette étude
  - que dans le cadre de cette étude le promoteur, le CHU de Clermont-Ferrand a souscrit à une assurance couvrant cette recherche
- que j'ai répondu en toute bonne foi aux questions concernant mon état de santé.

Les informations relatives à l'étude recueillies par l'investigateur sont traitées confidentiellement. J'accepte que les données enregistrées à l'occasion de cette recherche puissent faire l'objet d'un traitement informatisé anonyme. J'ai bien noté que le droit d'accès prévu par la loi du 6 août 2004 relative à l'informatique, aux fichiers et aux libertés s'exerce à tout moment auprès du médecin qui me suit dans le cadre de la recherche et qui connaît mon identité. Je pourrai exercer mon droit de rectification et d'opposition auprès de ce même médecin, qui contactera le promoteur de la recherche.

**Après avoir discuté librement et obtenu réponse à toutes mes questions, j'accepte librement et volontairement de participer à cette recherche biomédicale dans les conditions précisées dans le formulaire d'information et de consentement.**

**Nom et prénom du participant :**

.....

**Date : .. / .. / 201.**

**Signature**, précédée de la mention « Lu et compris »:

**Nom de l'investigateur :**

Dr

**Date : .. / .. / 201.**

**Signature :**

*Ce document est à réaliser en 2 exemplaires originaux, dont le premier doit être gardé 15 ans par l'investigateur, un autre remis à la personne donnant son consentement.*

# Reporting checklist for protocol of a clinical trial.

Based on the SPIRIT guidelines.

## Instructions to authors

Complete this checklist by entering the page numbers from your manuscript where readers will find each of the items listed below.

Your article may not currently address all the items on the checklist. Please modify your text to include the missing information. If you are certain that an item does not apply, please write "n/a" and provide a short explanation.

Upload your completed checklist as an extra file when you submit to a journal.

In your methods section, say that you used the SPIRIT reporting guidelines, and cite them as:

Chan A-W, Tetzlaff JM, Altman DG, Laupacis A, Gøtzsche PC, Krleža-Jerić K, Hróbjartsson A, Mann H, Dickersin K, Berlin J, Doré C, Parulekar W, Summerskill W, Groves T, Schulz K, Sox H, Rockhold FW, Rennie D, Moher D. SPIRIT 2013 Statement: Defining standard protocol items for clinical trials. *Ann Intern Med.* 2013;158(3):200-207

|                                             |                     | Reporting Item                                                                                               | Page Number  |
|---------------------------------------------|---------------------|--------------------------------------------------------------------------------------------------------------|--------------|
| Title                                       | <a href="#">#1</a>  | Descriptive title identifying the study design, population, interventions, and, if applicable, trial acronym | Page 1       |
| Trial registration                          | <a href="#">#2a</a> | Trial identifier and registry name. If not yet registered, name of intended registry                         | Page 3       |
| Trial registration: data set                | <a href="#">#2b</a> | All items from the World Health Organization Trial Registration Data Set                                     |              |
| Protocol version                            | <a href="#">#3</a>  | Date and version identifier                                                                                  | Page 2       |
| Funding                                     | <a href="#">#4</a>  | Sources and types of financial, material, and other support                                                  | Page 14      |
| Roles and responsibilities: contributorship | <a href="#">#5a</a> | Names, affiliations, and roles of protocol contributors                                                      | Pages 1-2;14 |
| Roles and responsibilities:                 | <a href="#">#5b</a> | Name and contact information for the trial sponsor                                                           | Page 2       |

|    |                      |                      |                                                                   |
|----|----------------------|----------------------|-------------------------------------------------------------------|
| 1  | sponsor contact      |                      |                                                                   |
| 2  | information          |                      |                                                                   |
| 3  |                      |                      |                                                                   |
| 4  | Roles and            | <a href="#">#5c</a>  | Role of study sponsor and funders, if any, in study design;       |
| 5  | responsibilities:    |                      | collection, management, analysis, and interpretation of           |
| 6  | sponsor and funder   |                      | data; writing of the report; and the decision to submit the       |
| 7  |                      |                      | report for publication, including whether they will have          |
| 8  |                      |                      | ultimate authority over any of these activities                   |
| 9  |                      |                      |                                                                   |
| 10 |                      |                      |                                                                   |
| 11 |                      |                      |                                                                   |
| 12 | Roles and            | <a href="#">#5d</a>  | Composition, roles, and responsibilities of the coordinating      |
| 13 | responsibilities:    |                      | centre, steering committee, endpoint adjudication                 |
| 14 | committees           |                      | committee, data management team, and other individuals            |
| 15 |                      |                      | or groups overseeing the trial, if applicable (see Item 21a       |
| 16 |                      |                      | for data monitoring committee)                                    |
| 17 |                      |                      |                                                                   |
| 18 |                      |                      |                                                                   |
| 19 |                      |                      |                                                                   |
| 20 | Background and       | <a href="#">#6a</a>  | Description of research question and justification for            |
| 21 | rationale            |                      | undertaking the trial, including summary of relevant studies      |
| 22 |                      |                      | (published and unpublished) examining benefits and harms          |
| 23 |                      |                      | for each intervention                                             |
| 24 |                      |                      |                                                                   |
| 25 |                      |                      |                                                                   |
| 26 |                      |                      |                                                                   |
| 27 | Background and       | <a href="#">#6b</a>  | Explanation for choice of comparators                             |
| 28 | rationale: choice of |                      |                                                                   |
| 29 | comparators          |                      |                                                                   |
| 30 |                      |                      |                                                                   |
| 31 |                      |                      |                                                                   |
| 32 | Objectives           | <a href="#">#7</a>   | Specific objectives or hypotheses                                 |
| 33 |                      |                      |                                                                   |
| 34 |                      |                      |                                                                   |
| 35 | Trial design         | <a href="#">#8</a>   | Description of trial design including type of trial (eg, parallel |
| 36 |                      |                      | group, crossover, factorial, single group), allocation ratio,     |
| 37 |                      |                      | and framework (eg, superiority, equivalence, non-                 |
| 38 |                      |                      | inferiority, exploratory)                                         |
| 39 |                      |                      |                                                                   |
| 40 |                      |                      |                                                                   |
| 41 |                      |                      |                                                                   |
| 42 | Study setting        | <a href="#">#9</a>   | Description of study settings (eg, community clinic,              |
| 43 |                      |                      | academic hospital) and list of countries where data will be       |
| 44 |                      |                      | collected. Reference to where list of study sites can be          |
| 45 |                      |                      | obtained                                                          |
| 46 |                      |                      |                                                                   |
| 47 |                      |                      |                                                                   |
| 48 | Eligibility criteria | <a href="#">#10</a>  | Inclusion and exclusion criteria for participants. If             |
| 49 |                      |                      | applicable, eligibility criteria for study centres and            |
| 50 |                      |                      | individuals who will perform the interventions (eg,               |
| 51 |                      |                      | surgeons, psychotherapists)                                       |
| 52 |                      |                      |                                                                   |
| 53 |                      |                      |                                                                   |
| 54 |                      |                      |                                                                   |
| 55 | Interventions:       | <a href="#">#11a</a> | Interventions for each group with sufficient detail to allow      |
| 56 | description          |                      | replication, including how and when they will be                  |
| 57 |                      |                      | administered                                                      |
| 58 |                      |                      |                                                                   |
| 59 |                      |                      |                                                                   |
| 60 |                      |                      |                                                                   |

|    |                      |                      |                                                             |           |
|----|----------------------|----------------------|-------------------------------------------------------------|-----------|
| 1  | Interventions:       | <a href="#">#11b</a> | Criteria for discontinuing or modifying allocated           |           |
| 2  | modifications        |                      | interventions for a given trial participant (eg, drug dose  |           |
| 3  |                      |                      | change in response to harms, participant request, or        |           |
| 4  |                      |                      | improving / worsening disease)                              |           |
| 5  |                      |                      |                                                             |           |
| 6  |                      |                      |                                                             |           |
| 7  | Interventions:       | <a href="#">#11c</a> | Strategies to improve adherence to intervention protocols,  |           |
| 8  | adherence            |                      | and any procedures for monitoring adherence (eg, drug       |           |
| 9  |                      |                      | tablet return; laboratory tests)                            |           |
| 10 |                      |                      |                                                             |           |
| 11 |                      |                      |                                                             |           |
| 12 |                      |                      |                                                             |           |
| 13 | Interventions:       | <a href="#">#11d</a> | Relevant concomitant care and interventions that are        |           |
| 14 | concomitant care     |                      | permitted or prohibited during the trial                    |           |
| 15 |                      |                      |                                                             |           |
| 16 |                      |                      |                                                             |           |
| 17 | Outcomes             | <a href="#">#12</a>  | Primary, secondary, and other outcomes, including the       | Pages 8-  |
| 18 |                      |                      | specific measurement variable (eg, systolic blood           | 11        |
| 19 |                      |                      | pressure), analysis metric (eg, change from baseline, final |           |
| 20 |                      |                      | value, time to event), method of aggregation (eg, median,   |           |
| 21 |                      |                      | proportion), and time point for each outcome. Explanation   |           |
| 22 |                      |                      | of the clinical relevance of chosen efficacy and harm       |           |
| 23 |                      |                      | outcomes is strongly recommended                            |           |
| 24 |                      |                      |                                                             |           |
| 25 |                      |                      |                                                             |           |
| 26 |                      |                      |                                                             |           |
| 27 |                      |                      |                                                             |           |
| 28 | Participant timeline | <a href="#">#13</a>  | Time schedule of enrolment, interventions (including any    | Pages 6,  |
| 29 |                      |                      | run-ins and washouts), assessments, and visits for          | 8, Figure |
| 30 |                      |                      | participants. A schematic diagram is highly recommended     | 1         |
| 31 |                      |                      | (see Figure)                                                |           |
| 32 |                      |                      |                                                             |           |
| 33 |                      |                      |                                                             |           |
| 34 |                      |                      |                                                             |           |
| 35 | Sample size          | <a href="#">#14</a>  | Estimated number of participants needed to achieve study    | Pages 6-  |
| 36 |                      |                      | objectives and how it was determined, including clinical    | 7         |
| 37 |                      |                      | and statistical assumptions supporting any sample size      |           |
| 38 |                      |                      | calculations                                                |           |
| 39 |                      |                      |                                                             |           |
| 40 |                      |                      |                                                             |           |
| 41 |                      |                      |                                                             |           |
| 42 | Recruitment          | <a href="#">#15</a>  | Strategies for achieving adequate participant enrolment to  | Page 7    |
| 43 |                      |                      | reach target sample size                                    |           |
| 44 |                      |                      |                                                             |           |
| 45 |                      |                      |                                                             |           |
| 46 | Allocation: sequence | <a href="#">#16a</a> | Method of generating the allocation sequence (eg,           | Page 6    |
| 47 | generation           |                      | computer-generated random numbers), and list of any         |           |
| 48 |                      |                      | factors for stratification. To reduce predictability of a   |           |
| 49 |                      |                      | random sequence, details of any planned restriction (eg,    |           |
| 50 |                      |                      | blocking) should be provided in a separate document that    |           |
| 51 |                      |                      | is unavailable to those who enrol participants or assign    |           |
| 52 |                      |                      | interventions                                               |           |
| 53 |                      |                      |                                                             |           |
| 54 |                      |                      |                                                             |           |
| 55 |                      |                      |                                                             |           |
| 56 |                      |                      |                                                             |           |
| 57 | Allocation           | <a href="#">#16b</a> | Mechanism of implementing the allocation sequence (eg,      |           |
| 58 | concealment          |                      | central telephone; sequentially numbered, opaque, sealed    |           |
| 59 |                      |                      |                                                             |           |
| 60 |                      |                      |                                                             |           |

|    |                        |                      |                                                                |          |
|----|------------------------|----------------------|----------------------------------------------------------------|----------|
| 1  | mechanism              |                      | envelopes), describing any steps to conceal the sequence       |          |
| 2  |                        |                      | until interventions are assigned                               |          |
| 3  |                        |                      |                                                                |          |
| 4  | Allocation:            | <a href="#">#16c</a> | Who will generate the allocation sequence, who will enrol      |          |
| 5  | implementation         |                      | participants, and who will assign participants to              |          |
| 6  |                        |                      | interventions                                                  |          |
| 7  |                        |                      |                                                                |          |
| 8  |                        |                      |                                                                |          |
| 9  | Blinding (masking)     | <a href="#">#17a</a> | Who will be blinded after assignment to interventions (eg,     |          |
| 10 |                        |                      | trial participants, care providers, outcome assessors, data    |          |
| 11 |                        |                      | analysts), and how                                             |          |
| 12 |                        |                      |                                                                |          |
| 13 |                        |                      |                                                                |          |
| 14 | Blinding (masking):    | <a href="#">#17b</a> | If blinded, circumstances under which unblinding is            |          |
| 15 | emergency              |                      | permissible, and procedure for revealing a participant's       |          |
| 16 | unblinding             |                      | allocated intervention during the trial                        |          |
| 17 |                        |                      |                                                                |          |
| 18 |                        |                      |                                                                |          |
| 19 |                        |                      |                                                                |          |
| 20 | Data collection plan   | <a href="#">#18a</a> | Plans for assessment and collection of outcome, baseline,      | Pages 8- |
| 21 |                        |                      | and other trial data, including any related processes to       | 11       |
| 22 |                        |                      | promote data quality (eg, duplicate measurements, training     |          |
| 23 |                        |                      | of assessors) and a description of study instruments (eg,      |          |
| 24 |                        |                      | questionnaires, laboratory tests) along with their reliability |          |
| 25 |                        |                      | and validity, if known. Reference to where data collection     |          |
| 26 |                        |                      | forms can be found, if not in the protocol                     |          |
| 27 |                        |                      |                                                                |          |
| 28 |                        |                      |                                                                |          |
| 29 |                        |                      |                                                                |          |
| 30 |                        |                      |                                                                |          |
| 31 | Data collection plan:  | <a href="#">#18b</a> | Plans to promote participant retention and complete follow-    |          |
| 32 | retention              |                      | up, including list of any outcome data to be collected for     |          |
| 33 |                        |                      | participants who discontinue or deviate from intervention      |          |
| 34 |                        |                      | protocols                                                      |          |
| 35 |                        |                      |                                                                |          |
| 36 |                        |                      |                                                                |          |
| 37 |                        |                      |                                                                |          |
| 38 | Data management        | <a href="#">#19</a>  | Plans for data entry, coding, security, and storage,           |          |
| 39 |                        |                      | including any related processes to promote data quality        |          |
| 40 |                        |                      | (eg, double data entry; range checks for data values).         |          |
| 41 |                        |                      | Reference to where details of data management                  |          |
| 42 |                        |                      | procedures can be found, if not in the protocol                |          |
| 43 |                        |                      |                                                                |          |
| 44 |                        |                      |                                                                |          |
| 45 |                        |                      |                                                                |          |
| 46 | Statistics: outcomes   | <a href="#">#20a</a> | Statistical methods for analysing primary and secondary        | Pages    |
| 47 |                        |                      | outcomes. Reference to where other details of the              | 11-12    |
| 48 |                        |                      | statistical analysis plan can be found, if not in the protocol |          |
| 49 |                        |                      |                                                                |          |
| 50 |                        |                      |                                                                |          |
| 51 |                        |                      |                                                                |          |
| 52 | Statistics: additional | <a href="#">#20b</a> | Methods for any additional analyses (eg, subgroup and          | Pages    |
| 53 | analyses               |                      | adjusted analyses)                                             | 11-12    |
| 54 |                        |                      |                                                                |          |
| 55 |                        |                      |                                                                |          |
| 56 | Statistics: analysis   | <a href="#">#20c</a> | Definition of analysis population relating to protocol non-    | Pages    |
| 57 | population and         |                      | adherence (eg, as randomised analysis), and any                | 11-12    |
| 58 | missing data           |                      | statistical methods to handle missing data (eg, multiple       |          |
| 59 |                        |                      |                                                                |          |
| 60 |                        |                      |                                                                |          |

imputation)

|    |                    |                      |                                                                 |
|----|--------------------|----------------------|-----------------------------------------------------------------|
| 1  |                    |                      |                                                                 |
| 2  |                    |                      |                                                                 |
| 3  | Data monitoring:   | <a href="#">#21a</a> | Composition of data monitoring committee (DMC);                 |
| 4  | formal committee   |                      | summary of its role and reporting structure; statement of       |
| 5  |                    |                      | whether it is independent from the sponsor and competing        |
| 6  |                    |                      | interests; and reference to where further details about its     |
| 7  |                    |                      | charter can be found, if not in the protocol. Alternatively, an |
| 8  |                    |                      | explanation of why a DMC is not needed                          |
| 9  |                    |                      |                                                                 |
| 10 |                    |                      |                                                                 |
| 11 |                    |                      |                                                                 |
| 12 | Data monitoring:   | <a href="#">#21b</a> | Description of any interim analyses and stopping                |
| 13 | interim analysis   |                      | guidelines, including who will have access to these interim     |
| 14 |                    |                      | results and make the final decision to terminate the trial      |
| 15 |                    |                      |                                                                 |
| 16 |                    |                      |                                                                 |
| 17 | Harms              | <a href="#">#22</a>  | Plans for collecting, assessing, reporting, and managing        |
| 18 |                    |                      | solicited and spontaneously reported adverse events and         |
| 19 |                    |                      | other unintended effects of trial interventions or trial        |
| 20 |                    |                      | conduct                                                         |
| 21 |                    |                      |                                                                 |
| 22 |                    |                      |                                                                 |
| 23 |                    |                      |                                                                 |
| 24 | Auditing           | <a href="#">#23</a>  | Frequency and procedures for auditing trial conduct, if any,    |
| 25 |                    |                      | and whether the process will be independent from                |
| 26 |                    |                      | investigators and the sponsor                                   |
| 27 |                    |                      |                                                                 |
| 28 |                    |                      |                                                                 |
| 29 |                    |                      |                                                                 |
| 30 | Research ethics    | <a href="#">#24</a>  | Plans for seeking research ethics committee / institutional     |
| 31 | approval           |                      | review board (REC / IRB) approval                               |
| 32 |                    |                      |                                                                 |
| 33 |                    |                      |                                                                 |
| 34 | Protocol           | <a href="#">#25</a>  | Plans for communicating important protocol modifications        |
| 35 | amendments         |                      | (eg, changes to eligibility criteria, outcomes, analyses) to    |
| 36 |                    |                      | relevant parties (eg, investigators, REC / IRBs, trial          |
| 37 |                    |                      | participants, trial registries, journals, regulators)           |
| 38 |                    |                      |                                                                 |
| 39 |                    |                      |                                                                 |
| 40 | Consent or assent  | <a href="#">#26a</a> | Who will obtain informed consent or assent from potential       |
| 41 |                    |                      | trial participants or authorised surrogates, and how (see       |
| 42 |                    |                      | Item 32)                                                        |
| 43 |                    |                      |                                                                 |
| 44 |                    |                      |                                                                 |
| 45 |                    |                      |                                                                 |
| 46 | Consent or assent: | <a href="#">#26b</a> | Additional consent provisions for collection and use of         |
| 47 | ancillary studies  |                      | participant data and biological specimens in ancillary          |
| 48 |                    |                      | studies, if applicable                                          |
| 49 |                    |                      |                                                                 |
| 50 |                    |                      |                                                                 |
| 51 | Confidentiality    | <a href="#">#27</a>  | How personal information about potential and enrolled           |
| 52 |                    |                      | participants will be collected, shared, and maintained in       |
| 53 |                    |                      | order to protect confidentiality before, during, and after the  |
| 54 |                    |                      | trial                                                           |
| 55 |                    |                      |                                                                 |
| 56 |                    |                      |                                                                 |
| 57 |                    |                      |                                                                 |
| 58 | Declaration of     | <a href="#">#28</a>  | Financial and other competing interests for principal           |
| 59 |                    |                      |                                                                 |
| 60 |                    |                      |                                                                 |

Page 24

Page 13

Page 14



|    |                       |                      |                                                                 |
|----|-----------------------|----------------------|-----------------------------------------------------------------|
| 1  | interests             |                      | investigators for the overall trial and each study site         |
| 2  | Data access           | <a href="#">#29</a>  | Statement of who will have access to the final trial dataset,   |
| 3  |                       |                      | and disclosure of contractual agreements that limit such        |
| 4  |                       |                      | access for investigators                                        |
| 5  |                       |                      |                                                                 |
| 6  |                       |                      |                                                                 |
| 7  | Ancillary and post    | <a href="#">#30</a>  | Provisions, if any, for ancillary and post-trial care, and for  |
| 8  | trial care            |                      | compensation to those who suffer harm from trial                |
| 9  |                       |                      | participation                                                   |
| 10 |                       |                      |                                                                 |
| 11 |                       |                      |                                                                 |
| 12 |                       |                      |                                                                 |
| 13 | Dissemination policy: | <a href="#">#31a</a> | Plans for investigators and sponsor to communicate trial        |
| 14 | trial results         |                      | results to participants, healthcare professionals, the public,  |
| 15 |                       |                      | and other relevant groups (eg, via publication, reporting in    |
| 16 |                       |                      | results databases, or other data sharing arrangements),         |
| 17 |                       |                      | including any publication restrictions                          |
| 18 |                       |                      |                                                                 |
| 19 |                       |                      |                                                                 |
| 20 |                       |                      |                                                                 |
| 21 | Dissemination policy: | <a href="#">#31b</a> | Authorship eligibility guidelines and any intended use of       |
| 22 | authorship            |                      | professional writers                                            |
| 23 |                       |                      |                                                                 |
| 24 |                       |                      |                                                                 |
| 25 | Dissemination policy: | <a href="#">#31c</a> | Plans, if any, for granting public access to the full protocol, |
| 26 | reproducible          |                      | participant-level dataset, and statistical code                 |
| 27 | research              |                      |                                                                 |
| 28 |                       |                      |                                                                 |
| 29 |                       |                      |                                                                 |
| 30 | Informed consent      | <a href="#">#32</a>  | Model consent form and other related documentation given        |
| 31 | materials             |                      | to participants and authorised surrogates                       |
| 32 |                       |                      |                                                                 |
| 33 |                       |                      |                                                                 |
| 34 | Biological specimens  | <a href="#">#33</a>  | Plans for collection, laboratory evaluation, and storage of     |
| 35 |                       |                      | biological specimens for genetic or molecular analysis in       |
| 36 |                       |                      | the current trial and for future use in ancillary studies, if   |
| 37 |                       |                      | applicable                                                      |
| 38 |                       |                      |                                                                 |
| 39 |                       |                      |                                                                 |
| 40 |                       |                      |                                                                 |

Page 13

41 The SPIRIT checklist is distributed under the terms of the Creative Commons Attribution License CC-  
 42 BY-ND 3.0. This checklist can be completed online using <https://www.goodreports.org/>, a tool made  
 43 by the [EQUATOR Network](#) in collaboration with [Penelope.ai](#)  
 44  
 45  
 46  
 47  
 48  
 49  
 50  
 51  
 52  
 53  
 54  
 55  
 56  
 57  
 58  
 59  
 60
