# Supplementary material for: Stress management in obesity during a thermal spa residential programme (ObesiStress): protocol for a randomised controlled trial study
Source: PubMed Central journal article supplement — BMJ Open. 2019 Dec 23;9(12):e027058. doi: 10.1136/bmjopen-2018-027058 (PMC7008425; doi:10.1136/bmjopen-2018-027058), 2019-12-23
Supplement: bmjopen-2018-027058supp002.pdf [file bmjopen-2018-027058supp002.pdf]

## Formulaire de consentement

Titre de l'étude : **Obesi-Stress**

Coordinateur et Investigateur principal : Dr Frédéric Dutheil

Promoteur : **CHU Clermont-Ferrand**, 58 Rue de Montalembert, 63000 Clermont-Ferrand, France

Je soussigné(e)

M<sup>me</sup>, M. (*ayer les mentions inutiles*) (*nom, prénom*) .....

Né(e) le .....

Demeurant .....

Déclare :

- que le Docteur (nom, prénom, tel) ..... m'a proposé de participer à l'étude sus nommée,
- qu'il m'a expliqué en détail le protocole,
- qu'il m'a notamment fait connaître :
  - l'objectif, la méthode et la durée de l'étude
  - les contraintes et les risques potentiels encourus
  - mon droit de refuser de participer et en cas de désaccord de retirer mon consentement à tout moment
  - mon obligation d'inscription à un régime de sécurité sociale
  - que, si je le souhaite, à son terme, je serais informé(e) par le médecin investigateur de ses résultats globaux
  - que le Comité de Protection des Personnes Sud-Est VI a émis un avis favorable en date du 25/01/2018
  - que l'ANSM a délivré une autorisation pour cette étude
  - que dans le cadre de cette étude le promoteur, le CHU de Clermont-Ferrand a souscrit à une assurance couvrant cette recherche
- que j'ai répondu en toute bonne foi aux questions concernant mon état de santé.

Les informations relatives à l'étude recueillies par l'investigateur sont traitées confidentiellement. J'accepte que les données enregistrées à l'occasion de cette recherche puissent faire l'objet d'un traitement informatisé anonyme. J'ai bien noté que le droit d'accès prévu par la loi du 6 août 2004 relative à l'informatique, aux fichiers et aux libertés s'exerce à tout moment auprès du médecin qui me suit dans le cadre de la recherche et qui connaît mon identité. Je pourrai exercer mon droit de rectification et d'opposition auprès de ce même médecin, qui contactera le promoteur de la recherche.

**Après avoir discuté librement et obtenu réponse à toutes mes questions, j'accepte librement et volontairement de participer à cette recherche biomédicale dans les conditions précisées dans le formulaire d'information et de consentement.**

**Nom et prénom du participant :**

.....

**Date : .. / .. / 201.**

**Signature**, précédée de la mention « Lu et compris »:

**Nom de l'investigateur :**

**Dr**

**Date : .. / .. / 201.**

**Signature :**

*Ce document est à réaliser en 2 exemplaires originaux, dont le premier doit être gardé 15 ans par l'investigateur, un autre remis à la personne donnant son consentement.*
